# Supplementary material for: Evaluation of Male Fertility-Associated Loci in a European Population of Patients with Severe Spermatogenic Impairment
Source: J Pers Med. 2020 Dec 29;11(1):22. doi: 10.3390/jpm11010022 (PMC7823507; doi:10.3390/jpm11010022)
Supplement: Supplementary file 1 [file jpm-11-00022-s001.zip › Hutterites_JPM_SuppTables_R1_MOD.xlsx]

## Sheet: Table_S1
Table S1. Main clinical features of the 725 infertile men included in the study. Percentages refer to all individuals with available information for the variable.
Clinical_feature	N for Variable (%)
Age at diagnosis, years	36 (33-41)*
Smoker (ever)	73 (39.04)
SO	225 (31.03)
Biopsy performed in SO	52 (23.11)
Successful sperm retrieval in biopsy of SO	52 (100.00)
Unsuccessful sperm retrieval in biopsy of SO	0 (0.00)
NOA	500 (68.97)
Sertoli cell only syndrome	103 (46.80)
Maturation arrest	52 (22.22)
Hypospermatogenesis	48 (20.51)
Biopsy performed in NOA	277 (88.78)
Successful sperm retrieval in biopsy of NOA	94 (39.66)
Unsuccessful sperm retrieval in biopsy of NOA	143 (60.34)
*Median and interquartile range (IQR) are shown for this variable. The datum for the control population is: 42 (36-47).
NOA, non-obstructive azoospermia; SO, severe oligospermia.

## Sheet: Table_S2
Table S2. Tools for generating functional prediction scores.
Method	Predicted effect	Score range	Note
CADD	Benign to pathogenic	[1, 99]	Score above 10 is considered for potentially pathogenic variants.
fitCons	Non-functional to functional	[0, 1]	Higher scores indicating more potential for interesting genomic function.
EIGEN	Non-functional to functional	[-5, 40]	With median score of around 0, higher scores indicating more likely to be functional.
EIGEN-PC	Non-functional to functional	[-5, 100]	With median score of around 0, higher scores indicating more likely to be functional.
FATHMM	Deleterious to neutral/benign	[0, 1]	Scores above 0.5 are predicted to be deleterious. Scores close to the extremes (0 or 1) yield the highest accuracy.
GWAVA	Non-functional to functional	[0, 1]	Higher scores indicating more likely to be functional.
DeepSEA	Functional to non-functional	[0, 1]	Lower scores indicating higher likelihood of functional significance.
FunSeq2	Non-functional to functional	[0, 6]	Higher scores indicating more likely to be functional.
ReMM	Non-deleterious to deleterious	[0, 1]	Higher scores indicating higher prediction of deleteriousness.

## Sheet: Table_S3
Table S3. RegulomeDB scoring scheme. eQTL, expression quantitative trait locus; TF, transcription factor.
Score	Supporting data
1a	eQTL + TF binding + matched TF motif + matched DNase Foprint + DNase peak.
1b	eQTL + TF binding + any motif + DNase Footprint + Dnase peak.
1c	eQTL + TF binding + matched TF motif + DNase peak.
1d	eQTL + TF binding + any motif + DNase peak.
1e	eQTL + TF binding + matched TF motif.
1f	eQTL + TF binding / DNase peak.
2a	TF binding + matched TF motif + matched DNase Footprint + DNase peak.
2b	TF binding + any motif + DNase Footprint + DNase peak.
2c	TF binding + matched TF motif + DNase peak.
3a	TF binding + any motif + DNase peak.
3b	TF binding + matched TF motif.
4	TF binding + DNase peak.
5	TF binding or DNase peak.
6	Other.

## Sheet: Table_S4
Table S4. Estimation of the statistical power of our study for 725 patients and 1058 controls. SNP, single-nucleotide polymorphism; MAF, minor allele frequency.
			Expected odds ratios
SNP	Ref allele	MAF	1.1	1.2	1.3	1.4	1.5
rs7174015	A	0.4215	0.287	0.763	0.971	0.999	1	Expected power
rs10129954	T	0.438	0.289	0.766	0.972	0.999	1
rs10966811	A	0.3936	0.282	0.756	0.969	0.999	1
rs7867029	C	0.1282	0.159	0.457	0.769	0.937	0.989
rs12870438	A	0.3926	0.282	0.756	0.969	0.998	1

## Sheet: Table_S5
Table S5. Overlap of the rs7174015 variant and its proxies with eQTL annotations and epigenetic marks from GTEx, ENCODE and Roadmap Epigenomic projects.
General_information						localization_effect			GTEX data for eQTL					Overlap_with_epigenetic_mark				Haploreg_result		functional_prediction_effect		other_annotation
Lead	refsnp_id	variant_id	R2	Predicted.Function	EUR.Frequency	Coding_effect	cpg_effect	mirna_effect	tissue	gene_id	pval_nominal	slope	pval_beta	Overlap with Testis Annotation (ENCODE)	encode_result	roadmap_result	regbuild_result	protein_bound	motifs_changed	RegulomeDB	functional_prediction_effect	gad_effect	clinvar.Phenotypes	cosmic.Sample	gwas_Trait
rs7174015	rs10152326	chr15_50450051_A_G_b38	0.8169	intronic;3downstream;non-coding intronic	0.4692	polyphen_0_0:sift_0_0	0_0	mirbase_0_0:tarbase_0:mirna_0_0:targetscan__0	Artery_Tibial	ENSG00000138592.13	5.44444e-05	0.0803963	3.37856e-23	0	encode_H3K36me3_DND-41;encode_H3K36me3_MCF 7;encode_H3K36me3_Monocytes-CD14+;encode_H3K36me3_CD14 positive monocyte;encode_H3K36me3_GM12878;encode_H3K36me3_GM12878 ENCSR447YYN;encode_H3K4me1_K562;encode_H3K4me1_endothelial cell of umbilical vein;encode_H3K4me1_HUVEC;encode_H3K36me3_A673;encode_H3K36me3_bipolar neuron	roadmap_H3K36me3_Thymus;roadmap_H3K36me3_Placenta;roadmap_H3K36me3_iPS DF 19.11;roadmap_H3K36me3_IMR 90;roadmap_H3K36me3_Right Atrium;roadmap_H3K79me2_IMR 90;roadmap_H3K36me3_H1 hESC;roadmap_H3K36me3_H1-mesenchymal;roadmap_H3K36me3_Left Ventricle;roadmap_H3K36me3_endodermal cell;roadmap_H3K36me3_sigmoid colon;roadmap_H3K79me2_H1 hESC;roadmap_H3K36me3_common myeloid progenitor CD34 positive ENCSR7…	0		CHD2, NRSF, Rad21	6	cadd_2.09;2.307:deepsea_0.39934;0.37801:eigen_-0.81643:fathmm_0.03819;0.02424_AB:fitcons_0.062308:funseq2_0.580878:gwava_0.04:remm_0.018	0_0_0	0	0	0
									Brain_Cerebellar_Hemisphere	ENSG00000273674.4	4.5581e-05	0.355223	5.29283e-07
									Brain_Nucleus_accumbens_basal_ganglia	ENSG00000273674.4	1.36543e-06	0.400177	1.16695e-05
									Cells_Cultured_fibroblasts	ENSG00000092439.13	3.7709e-06	0.0846541	1.68999e-06
									Cells_Cultured_fibroblasts	ENSG00000138600.9	0.000234978	0.137262	3.33303e-60
									Esophagus_Mucosa	ENSG00000092439.13	0.000138102	0.0797351	0.00210643
									Esophagus_Muscularis	ENSG00000273674.4	9.2706e-05	0.201014	2.82624e-06
									Muscle_Skeletal	ENSG00000092439.13	2.58634e-05	-0.119271	5.27509e-09
									Muscle_Skeletal	ENSG00000138600.9	1.37386e-06	0.106098	4.71e-13
									Skin_Not_Sun_Exposed_Suprapubic	ENSG00000242737.1	0.000260063	0.176091	0.00717863
									Testis	ENSG00000081014.10	1.71658e-05	0.140421	3.23966e-12
									Testis	ENSG00000138592.13	6.83245e-08	0.158126	9.59725e-09
									Testis	ENSG00000170236.14	1.18869e-05	-0.0989008	2.14528e-11
									Testis	ENSG00000259618.1	0.000174309	0.14376	3.52374e-11
									Whole_Blood	ENSG00000138592.13	5.7503e-05	-0.0555993	7.45769e-16
	rs11070776	chr15_50443291_G_A_b38	0.9758	3downstream;intronic;non-coding intronic	0.4254	polyphen_0_0:sift_0_0	0_0	mirbase_0_0:tarbase_0:mirna_0_0:targetscan__0	Artery_Tibial	ENSG00000273674.4	0.000173456	0.184008	1.84286e-11	0	encode_H3K79me2_GM12878;encode_H4K20me1_Monocytes-CD14+;encode_H3K36me3_Monocytes-CD14+;encode_H3K36me3_CD14 positive monocyte;encode_H3K36me3_DND-41;encode_H3K36me3_HepG2;encode_H3K36me3_A549;encode_H3K36me3_A549 ENCSR797CXN;encode_H3K36me3_GM12878;encode_H3K36me3_MCF 7;encode_H3K36me3_bipolar neuron;encode_H3K36me3_Osteobl;encode_H3K79me2_HSMMtube;encode_H3K36me3_B cell ENCSR682AXR;encode_H3K4m…	roadmap_H3K36me3_Monocytes-CD14+ (PB) Roadmap;roadmap_H3K36me3_neural stem progenitor cell;roadmap_H3K36me3_common myeloid progenitor CD34 positive;roadmap_H3K36me3_endodermal cell;roadmap_H3K36me3_common myeloid progenitor CD34 positive ENCSR337XXD 1;roadmap_H3K36me3_common myeloid progenitor CD34 positive ENCSR722JRY;roadmap_H3K36me3_HUES64;roadmap_H3K36me3_Natural Killer cells (PB);roadmap_H3K…	0		Rad21, Sp4	5	cadd_0.504;0.737;0.535:deepsea_0.34519:eigen_-0.726639:fathmm_0.04853;0.04123;0.04724_AB:fitcons_0.099367:funseq2_0.580878:gwava_0.01:remm_0.01	0_0_0	0	0	0
									Brain_Cerebellar_Hemisphere	ENSG00000273674.4	5.29961e-06	0.389711	5.29283e-07
									Brain_Cerebellum	ENSG00000273674.4	0.000144612	0.328956	1.09078e-09
									Brain_Nucleus_accumbens_basal_ganglia	ENSG00000273674.4	9.31896e-06	0.361592	1.16695e-05
									Cells_Cultured_fibroblasts	ENSG00000092439.13	9.62283e-06	0.0830638	1.68999e-06
									Esophagus_Mucosa	ENSG00000092439.13	0.000191805	0.0797891	0.00210643
									Esophagus_Muscularis	ENSG00000273674.4	0.000127847	0.202282	2.82624e-06
									Muscle_Skeletal	ENSG00000092439.13	4.74849e-05	-0.118041	5.27509e-09
									Muscle_Skeletal	ENSG00000138600.9	2.34823e-05	0.0952718	4.71e-13
									Prostate	ENSG00000242737.1	9.52952e-06	0.351355	0.0136367
									Skin_Not_Sun_Exposed_Suprapubic	ENSG00000242737.1	2.13244e-05	0.211523	0.00717863
									Testis	ENSG00000081014.10	6.14497e-05	0.136148	3.23966e-12
									Testis	ENSG00000138592.13	5.7852e-10	0.186858	9.59725e-09
									Testis	ENSG00000170236.14	1.67704e-05	-0.10093	2.14528e-11
									Testis	ENSG00000259618.1	9.9852e-05	0.154504	3.52374e-11
									Whole_Blood	ENSG00000138592.13	1.60573e-06	-0.0674602	7.45769e-16
	rs11417752	0	0.8169	intronic;non-coding intronic;3downstream	0	polyphen_0_0:sift_0_0	0_0	mirbase_0_0:tarbase_0:mirna_0_0:targetscan__0	0	0	NA	NA	NA	ENCFF610XSK_H3K27ac_Testis_Adult54_ENCODE_GRCh38_Peak_99233	encode_H3K79me2_GM12878;encode_H3K36me3_Monocytes-CD14+;encode_H3K36me3_CD14 positive monocyte;encode_H3K36me3_MCF 7;encode_H3K36me3_SK N SH;encode_H3K36me3_bipolar neuron;encode_H3K79me2_HSMMtube;encode_H3K36me3_A549 ENCSR797CXN;encode_H3K36me3_A549;encode_H3K4me1_A549;encode_H3K4me1_A549 ENCSR797CXN;encode_H3K79me2_HSMM;encode_H3K36me3_Osteobl;encode_H3K4me1_B cell ENCSR682AXR	roadmap_H3K36me3_neural stem progenitor cell;roadmap_H3K36me3_neutrophil;roadmap_H3K36me3_Placenta;roadmap_H3K36me3_neuron;roadmap_H3K36me3_endodermal cell;roadmap_H3K36me3_HUES64;roadmap_H3K36me3_CD4 positive alpha beta T cell ENCSR948ZKZ;roadmap_H3K36me3_T cells (PB) Roadmap;roadmap_H3K36me3_Natural Killer cells (PB);roadmap_H3K36me3_lung ENCSR465WKM;roadmap_H3K36me3_iPS-20b;roadmap_H3K36me3_co…	0		Foxd1, HNF4, Mef2, Pitx2	7	cadd_0:deepsea_0:eigen_0:fathmm_0_0:fitcons_0.088506:funseq2_0:gwava_0:remm_0.013	0_0_0	0	0	0
	rs12593481	chr15_50426079_T_C_b38	0.8242	5upstream;non-coding intronic;intronic	0.4692	polyphen_0_0:sift_0_0	0_0	mirbase_0_0:tarbase_0:mirna_0_0:targetscan__0	Artery_Tibial	ENSG00000138592.13	3.82589e-05	0.0814979	3.37856e-23	ENCFF316MJM_H3K4me1_Testis_Adult37_ENCODE_GRCh38_Peak_39433;ENCFF286DAB_H3K4me3_Testis_Adult37_ENCODE_GRCh38_Peak_30755	encode_H3K79me2_GM12878;encode_H3K4me3_bipolar neuron;encode_H3K4me2_NHDF-AD;encode_H3K4me3_MCF 7;encode_H3K4me2_HMEC;encode_H3K4me3_GM12878;encode_CLOCK_MCF 7;encode_H3K4me3_HeLa-S3;encode_H3K4me3_K562;encode_H3K4me3_HepG2;encode_H3K79me2_HeLa-S3;encode_H3K79me2_HSMM;encode_H3K4me2_A549;encode_H3K79me2_HSMMtube;encode_H3K4me2_HeLa-S3;encode_H3K4me1_Monocytes-CD14+;encode_H3K4me1_CD14 positive mo…	roadmap_H3K4me1_T cells (PB) Roadmap;roadmap_H3K4me2_IMR90;roadmap_H3K4me2_IMR 90;roadmap_H3K79me2_IMR 90;roadmap_H3K4me1_common myeloid progenitor CD34 positive ENCSR337XXD 1;roadmap_H3K79me2_IMR90;roadmap_H3K4me1_CD4 positive alpha beta T cell ENCSR948ZKZ;roadmap_H3K4me1_Natural Killer cells (PB);roadmap_H3K4me1_common myeloid progenitor CD34 positive;roadmap_H3K4me1_neuron;roadmap_H3K4me1_CD4 …	regbuild_Promoter_INACTIVE_DND-41;regbuild_Promoter_INACTIVE_effector memory CD4 positive alpha beta T cell;regbuild_Promoter_INACTIVE_EM CD8+ ab T cell (VB);regbuild_Promoter_INACTIVE_endodermal cell;regbuild_Promoter_INACTIVE_endothelial cell of umbilical vein;regbuild_Promoter_INACTIVE_eosinophil (VB);regbuild_Promoter_INACTIVE_EPC (VB);regbuild_Promoter_INACTIVE_erythroblast (CB);regbuild_Pro…	CEBPB	CEBPA, CEBPB, CEBPD, CHOP, Pax5, Whn, YY1, p300	3b	cadd_4.956:deepsea_0.040078:eigen_-0.406658:fathmm_0.03547_ABC:fitcons_0.093295:funseq2_0.736264:gwava_0.67:remm_0.071	0_0_0	0	0	0
									Brain_Cerebellar_Hemisphere	ENSG00000273674.4	4.23929e-05	0.355461	5.29283e-07
									Brain_Nucleus_accumbens_basal_ganglia	ENSG00000273674.4	1.11514e-06	0.403639	1.16695e-05
									Cells_Cultured_fibroblasts	ENSG00000092439.13	3.89103e-06	0.0841752	1.68999e-06
									Cells_Cultured_fibroblasts	ENSG00000138600.9	9.29803e-05	0.145071	3.33303e-60
									Esophagus_Mucosa	ENSG00000092439.13	0.000164062	0.0787706	0.00210643
									Esophagus_Muscularis	ENSG00000273674.4	0.000133552	0.196739	2.82624e-06
									Muscle_Skeletal	ENSG00000092439.13	1.38579e-05	-0.122462	5.27509e-09
									Muscle_Skeletal	ENSG00000138600.9	9.61096e-07	0.107018	4.71e-13
									Muscle_Skeletal	ENSG00000241130.1	0.000204074	-0.130453	3.22303e-14
									Skin_Not_Sun_Exposed_Suprapubic	ENSG00000242737.1	0.000207451	0.178743	0.00717863
									Testis	ENSG00000081014.10	1.01226e-05	0.143622	3.23966e-12
									Testis	ENSG00000138592.13	5.01266e-08	0.159169	9.59725e-09
									Testis	ENSG00000170236.14	1.90068e-05	-0.0963488	2.14528e-11
									Testis	ENSG00000259618.1	0.000160938	0.144059	3.52374e-11
									Whole_Blood	ENSG00000138592.13	4.39318e-05	-0.0561683	7.45769e-16
	rs2289108	chr15_50490138_G_A_b38	0.9758	non-coding intronic;intronic	0.5746	polyphen_0_0:sift_0_0	0_0	mirbase_0_0:tarbase_0:mirna_0_0:targetscan__0	Artery_Tibial	ENSG00000273674.4	8.4984e-05	-0.194487	1.84286e-11	0	encode_H3K36me3_Monocytes-CD14+;encode_H3K36me3_CD14 positive monocyte;encode_H3K36me3_MCF 7;encode_H3K36me3_bipolar neuron;encode_H3K36me3_SK N SH;encode_H3K36me3_HepG2;encode_H3K36me3_HMEC;encode_H3K36me3_HCT116;encode_H3K36me3_DND-41;encode_H3K36me3_NH-A;encode_H3K36me3_HeLa S3;encode_H3K36me3_mammary epithelial cell;encode_H3K36me3_Osteobl;encode_H3K36me3_HSMM;encode_H3K36me3_skeletal muscle …	roadmap_H3K36me3_neural stem progenitor cell;roadmap_H3K36me3_Monocytes-CD14+ (PB) Roadmap;roadmap_H3K36me3_common myeloid progenitor CD34 positive;roadmap_H3K36me3_common myeloid progenitor CD34 positive ENCSR337XXD 1;roadmap_H3K36me3_T cells (PB) Roadmap;roadmap_H3K36me3_Placenta;roadmap_H3K36me3_neuron;roadmap_H3K36me3_Natural Killer cells (PB);roadmap_H3K36me3_HUES48;roadmap_H3K36me3_B cells …	0		TATA, YY1	6	cadd_2.538:deepsea_0.083479:eigen_0.058305:fathmm_0.12883_AB:fitcons_0.088506:funseq2_0.580878:gwava_0.13:remm_0.011	0_0_0	0	0	0
									Brain_Cerebellar_Hemisphere	ENSG00000273674.4	7.11687e-06	-0.384209	5.29283e-07
									Brain_Cerebellum	ENSG00000273674.4	0.000123545	-0.329025	1.09078e-09
									Brain_Nucleus_accumbens_basal_ganglia	ENSG00000273674.4	9.08476e-06	-0.360078	1.16695e-05
									Cells_Cultured_fibroblasts	ENSG00000092439.13	5.32235e-07	-0.095005	1.68999e-06
									Esophagus_Mucosa	ENSG00000092439.13	4.37724e-05	-0.0881118	0.00210643
									Esophagus_Muscularis	ENSG00000273674.4	0.000175841	-0.201298	2.82624e-06
									Muscle_Skeletal	ENSG00000092439.13	0.000146417	0.110784	5.27509e-09
									Muscle_Skeletal	ENSG00000138600.9	8.93207e-06	-0.100447	4.71e-13
									Prostate	ENSG00000242737.1	6.52818e-05	-0.32231	0.0136367
									Skin_Not_Sun_Exposed_Suprapubic	ENSG00000242737.1	1.13291e-05	-0.221396	0.00717863
									Testis	ENSG00000081014.10	0.000129438	-0.130383	3.23966e-12
									Testis	ENSG00000138592.13	1.05666e-08	-0.173661	9.59725e-09
									Testis	ENSG00000170236.14	3.09802e-05	0.0979284	2.14528e-11
									Thyroid	ENSG00000273674.4	0.000519009	-0.173573	1.3765e-07
									Whole_Blood	ENSG00000138592.13	1.10359e-06	0.0694127	7.45769e-16
	rs28582911	chr15_50437432_G_A_b38	0.9799	5upstream;non-coding intronic;intronic	0.4264	polyphen_0_0:sift_0_0	0_0	mirbase_0_0:tarbase_0:mirna_0_0:targetscan__0	Artery_Tibial	ENSG00000273674.4	0.000236294	0.179646	1.84286e-11	0	encode_H3K79me2_GM12878;encode_H3K79me2_HeLa-S3;encode_H3K79me2_HSMM;encode_H3K79me2_HSMMtube;encode_H4K20me1_Monocytes-CD14+;encode_H3K36me3_Monocytes-CD14+;encode_H3K36me3_CD14 positive monocyte;encode_H4K20me1_HSMMtube;encode_H3K36me3_SK N SH;encode_H3K36me3_A549;encode_H3K4me1_A549;encode_H3K36me3_A549 ENCSR797CXN;encode_H3K4me1_A549 ENCSR797CXN;encode_H3K36me3_DND-41	roadmap_H3K36me3_Monocytes-CD14+ (PB) Roadmap;roadmap_H3K36me3_neural stem progenitor cell;roadmap_H3K36me3_common myeloid progenitor CD34 positive ENCSR722JRY;roadmap_H3K36me3_common myeloid progenitor CD34 positive;roadmap_H3K79me1_IMR 90;roadmap_H3K36me3_endodermal cell;roadmap_H3K36me3_HUES48;roadmap_H3K4me1_lung ENCSR465WKM;roadmap_H3K4me1_B cells (PB) Roadmap;roadmap_H3K36me3_Natural Killer…	0		SIX5	5	cadd_1.849:deepsea_0.10657:eigen_-0.360355:fathmm_0.06679_AB:fitcons_0.106106:funseq2_0.580878:gwava_0.09:remm_0.012	0_0_0	0	0	0
									Brain_Cerebellar_Hemisphere	ENSG00000273674.4	6.70094e-06	0.381607	5.29283e-07
									Brain_Cerebellum	ENSG00000273674.4	0.000106084	0.334159	1.09078e-09
									Brain_Nucleus_accumbens_basal_ganglia	ENSG00000273674.4	9.31896e-06	0.361592	1.16695e-05
									Cells_Cultured_fibroblasts	ENSG00000092439.13	9.98435e-06	0.0826069	1.68999e-06
									Esophagus_Mucosa	ENSG00000092439.13	0.000210156	0.0789183	0.00210643
									Esophagus_Muscularis	ENSG00000273674.4	0.000117675	0.203682	2.82624e-06
									Muscle_Skeletal	ENSG00000092439.13	6.82995e-05	-0.11529	5.27509e-09
									Muscle_Skeletal	ENSG00000138600.9	3.63363e-05	0.0928239	4.71e-13
									Prostate	ENSG00000242737.1	9.59053e-06	0.348992	0.0136367
									Skin_Not_Sun_Exposed_Suprapubic	ENSG00000242737.1	8.79114e-06	0.220456	0.00717863
									Testis	ENSG00000081014.10	0.000123341	0.129932	3.23966e-12
									Testis	ENSG00000138592.13	6.22339e-10	0.185572	9.59725e-09
									Testis	ENSG00000170236.14	2.73893e-05	-0.0979299	2.14528e-11
									Testis	ENSG00000259618.1	0.000160282	0.149232	3.52374e-11
									Whole_Blood	ENSG00000138592.13	1.14064e-06	-0.0681345	7.45769e-16
	rs3098167	chr15_50458272_T_C_b38	0.8136	non-coding intronic;intronic;5upstream	0.4702	polyphen_0_0:sift_0_0	0_0	mirbase_0_0:tarbase_0:mirna_0_0:targetscan__0	Artery_Tibial	ENSG00000138592.13	8.23965e-05	0.0781447	3.37856e-23	ENCFF316MJM_H3K4me1_Testis_Adult37_ENCODE_GRCh38_Peak_124508	encode_H3K36me3_Monocytes-CD14+;encode_H3K36me3_CD14 positive monocyte;encode_H3K36me3_GM12878;encode_H4K20me1_Monocytes-CD14+;encode_H3K4me1_bipolar neuron;encode_H3K36me3_HMEC;encode_H3K36me3_mammary epithelial cell;encode_H3K36me3_skeletal muscle myoblast;encode_H3K36me3_HSMM;encode_H3K36me3_HeLa S3;encode_H3K36me3_A549 ENCSR797CXN;encode_H3K36me3_A549;encode_H3K36me3_NHEK;encode_H3K4me1_GM128…	roadmap_H3K36me3_neural stem progenitor cell;roadmap_H3K36me3_B cells (PB) Roadmap;roadmap_H3K36me3_Monocytes-CD14+ (PB) Roadmap;roadmap_H3K36me3_common myeloid progenitor CD34 positive;roadmap_H3K36me3_CD4 positive alpha beta T cell ENCSR948ZKZ;roadmap_H3K36me3_common myeloid progenitor CD34 positive ENCSR337XXD 1;roadmap_H3K36me3_Fetal Adrenal Gland;roadmap_H3K36me3_endodermal cell;roadmap_H3K3…	0		LUN1, Maf	5	cadd_5.003:deepsea_0.079779:eigen_-0.37746:fathmm_0.03706_AB:fitcons_0.099367:funseq2_0.580878:gwava_0.17:remm_0.032	0_0_0	0	0	0
									Brain_Cerebellar_Hemisphere	ENSG00000273674.4	4.23929e-05	0.355461	5.29283e-07
									Brain_Nucleus_accumbens_basal_ganglia	ENSG00000273674.4	7.82342e-07	0.407434	1.16695e-05
									Brain_Putamen_basal_ganglia	ENSG00000273674.4	9.89281e-05	0.378225	1.38903e-05
									Cells_Cultured_fibroblasts	ENSG00000092439.13	4.54732e-06	0.0836143	1.68999e-06
									Esophagus_Mucosa	ENSG00000092439.13	0.000129549	0.0796367	0.00210643
									Esophagus_Muscularis	ENSG00000273674.4	8.76778e-05	0.201706	2.82624e-06
									Muscle_Skeletal	ENSG00000092439.13	7.01891e-05	-0.112557	5.27509e-09
									Muscle_Skeletal	ENSG00000138600.9	1.30798e-06	0.106087	4.71e-13
									Muscle_Skeletal	ENSG00000241130.1	0.000318032	-0.126946	3.22303e-14
									Skin_Not_Sun_Exposed_Suprapubic	ENSG00000242737.1	0.000115011	0.186337	0.00717863
									Testis	ENSG00000081014.10	2.78853e-05	0.136698	3.23966e-12
									Testis	ENSG00000138592.13	1.17625e-07	0.155069	9.59725e-09
									Testis	ENSG00000170236.14	9.95515e-06	-0.0995304	2.14528e-11
									Whole_Blood	ENSG00000138592.13	4.01132e-05	-0.0566104	7.45769e-16
	rs3098169	chr15_50462142_G_A_b38	0.8202	non-coding intronic;5upstream;intronic	0.4682	polyphen_0_0:sift_0_0	0_0	mirbase_0_0:tarbase_0:mirna_0_0:targetscan__0	Artery_Tibial	ENSG00000138592.13	9.47298e-05	0.0776756	3.37856e-23	ENCFF855EVV_CTCF_Testis_Adult37_ENCODE_GRCh38_.	encode_H3K36me3_Monocytes-CD14+;encode_H3K36me3_CD14 positive monocyte;encode_H4K20me1_Monocytes-CD14+;encode_H3K36me3_DND-41;encode_H3K36me3_SK N SH;encode_H3K36me3_skeletal muscle myoblast;encode_H3K36me3_HSMM;encode_H3K4me1_Karpas 422;encode_H3K36me3_Karpas 422;encode_H3K36me3_MCF 7;encode_H3K36me3_A549;encode_H3K36me3_bipolar neuron;encode_H3K36me3_A549 ENCSR797CXN	roadmap_H3K36me3_neural stem progenitor cell;roadmap_H3K36me3_Monocytes-CD14+ (PB) Roadmap;roadmap_H3K36me3_common myeloid progenitor CD34 positive;roadmap_H3K36me3_CD4 positive alpha beta T cell ENCSR948ZKZ;roadmap_H3K36me3_common myeloid progenitor CD34 positive ENCSR337XXD 1;roadmap_H3K36me3_Fetal Adrenal Gland;roadmap_H3K36me3_neutrophil;roadmap_H3K36me3_common myeloid progenitor CD34 positiv…	0		Foxp1, Pou1f1, Pau5f1, Sox	3a	cadd_0.064;0.091:deepsea_0.10638;0.13636:eigen_-0.454919:fathmm_0.09565;0.05321_AB:fitcons_0.088506:funseq2_0.580878:gwava_0.21:remm_0.007	0_0_0	0	0	0
									Brain_Cerebellar_Hemisphere	ENSG00000273674.4	4.5581e-05	0.355223	5.29283e-07
									Brain_Nucleus_accumbens_basal_ganglia	ENSG00000273674.4	9.67631e-07	0.403772	1.16695e-05
									Brain_Putamen_basal_ganglia	ENSG00000273674.4	8.88044e-05	0.378424	1.38903e-05
									Cells_Cultured_fibroblasts	ENSG00000092439.13	3.92e-06	0.0841676	1.68999e-06
									Esophagus_Mucosa	ENSG00000092439.13	0.000106488	0.0807221	0.00210643
									Esophagus_Muscularis	ENSG00000273674.4	8.4905e-05	0.202478	2.82624e-06
									Muscle_Skeletal	ENSG00000092439.13	5.31118e-05	-0.114586	5.27509e-09
									Muscle_Skeletal	ENSG00000138600.9	2.1368e-06	0.104137	4.71e-13
									Skin_Not_Sun_Exposed_Suprapubic	ENSG00000242737.1	0.00019545	0.180006	0.00717863
									Testis	ENSG00000081014.10	2.78853e-05	0.136698	3.23966e-12
									Testis	ENSG00000138592.13	1.17625e-07	0.155069	9.59725e-09
									Testis	ENSG00000170236.14	9.95515e-06	-0.0995304	2.14528e-11
									Whole_Blood	ENSG00000138592.13	8.50657e-05	-0.0543243	7.45769e-16
	rs3098171	chr15_50479314_C_G_b38	0.9758	intronic	0.4254	polyphen_0_0:sift_0_0	0_0	mirbase_0_0:tarbase_0:mirna_0_0:targetscan__0	Artery_Tibial	ENSG00000273674.4	0.00018862	0.182948	1.84286e-11	0	encode_H3K36me3_Monocytes-CD14+;encode_H3K36me3_CD14 positive monocyte;encode_H3K36me3_bipolar neuron;encode_H3K36me3_MCF 7;encode_H3K36me3_skeletal muscle myoblast;encode_H3K36me3_HSMM;encode_H3K36me3_HeLa S3;encode_H3K36me3_A549;encode_H3K36me3_A549 ENCSR797CXN;encode_H3K36me3_Osteobl;encode_H3K36me3_DND-41;encode_H3K36me3_NHLF;encode_H3K36me3_GM12878;encode_H3K36me3_fibroblast of lung;encode_H…	roadmap_H3K36me3_neural stem progenitor cell;roadmap_H3K36me3_Monocytes-CD14+ (PB) Roadmap;roadmap_H3K36me3_Natural Killer cells (PB);roadmap_H3K36me3_B cells (PB) Roadmap;roadmap_H3K36me3_neuron;roadmap_H3K36me3_common myeloid progenitor CD34 positive;roadmap_H3K36me3_HUES64;roadmap_H3K36me3_HUES6;roadmap_H3K36me3_neutrophil;roadmap_H3K36me3_common myeloid progenitor CD34 positive ENCSR337XXD 1;…	0		CEBPB, Hsf, TEF	4	cadd_1.279:deepsea_0.27279:eigen_-0.259828:fathmm_0.05063_AB:fitcons_0.099367:funseq2_0.580878:gwava_0.03:remm_0.017	0_0_0	0	0	0
									Brain_Cerebellar_Hemisphere	ENSG00000273674.4	5.29961e-06	0.389711	5.29283e-07
									Brain_Cerebellum	ENSG00000273674.4	0.000144612	0.328956	1.09078e-09
									Brain_Nucleus_accumbens_basal_ganglia	ENSG00000273674.4	9.31896e-06	0.361592	1.16695e-05
									Cells_Cultured_fibroblasts	ENSG00000092439.13	9.92845e-06	0.0827675	1.68999e-06
									Esophagus_Mucosa	ENSG00000092439.13	0.000181072	0.0800593	0.00210643
									Esophagus_Muscularis	ENSG00000273674.4	0.000104604	0.20532	2.82624e-06
									Muscle_Skeletal	ENSG00000092439.13	9.27758e-05	-0.113479	5.27509e-09
									Muscle_Skeletal	ENSG00000138600.9	5.49018e-05	0.0909268	4.71e-13
									Prostate	ENSG00000242737.1	1.28636e-05	0.346186	0.0136367
									Skin_Not_Sun_Exposed_Suprapubic	ENSG00000242737.1	1.12827e-05	0.218792	0.00717863
									Testis	ENSG00000081014.10	9.95543e-05	0.131918	3.23966e-12
									Testis	ENSG00000138592.13	1.17835e-09	0.183103	9.59725e-09
									Testis	ENSG00000170236.14	1.42732e-05	-0.101414	2.14528e-11
									Testis	ENSG00000259618.1	0.00018444	0.148178	3.52374e-11
									Whole_Blood	ENSG00000138592.13	9.29553e-07	-0.0688839	7.45769e-16
	rs3098174	chr15_50486656_C_T_b38	0.8633	intronic	0.3986	polyphen_0_0:sift_0_0	0_0	mirbase_0_0:tarbase_0:mirna_0_0:targetscan__0	Adipose_Subcutaneous	ENSG00000138600.9	1.048e-05	0.134856	8.36314e-30	0	encode_H3K36me3_Monocytes-CD14+;encode_H3K36me3_CD14 positive monocyte;encode_H4K20me1_Monocytes-CD14+;encode_H3K36me3_NHEK;encode_H3K36me3_bipolar neuron;encode_SREBF1_MCF 7;encode_H3K36me3_MCF 7;encode_H3K36me3_A549 ENCSR797CXN;encode_H3K36me3_A549;encode_MNT_MCF 7	roadmap_H3K36me3_neural stem progenitor cell;roadmap_H3K36me3_Monocytes-CD14+ (PB) Roadmap;roadmap_H3K36me3_neuron;roadmap_H3K36me3_common myeloid progenitor CD34 positive;roadmap_H3K36me3_HUES64;roadmap_H3K36me3_common myeloid progenitor CD34 positive ENCSR337XXD 1;roadmap_H3K36me3_endodermal cell;roadmap_H3K36me3_HUES6;roadmap_H3K36me3_Natural Killer cells (PB);roadmap_H3K36me3_T cells (PB) Roa…	0		CEBPB, Cart1, Dbx1, Dbx2, Foxa, Foxj1, Foxj2, Foxp1, HNF1, Lhx3, Ncx, Pax6, Pou2f2, Pou3f4, Pou6f1, TATA	5	cadd_0.629:deepsea_0.20445:eigen_-0.644072:fathmm_0.06085_AB:fitcons_0.099367:funseq2_0.580878:gwava_0.12:remm_0.009	0_0_0	0	0	0
									Adipose_Visceral_Omentum	ENSG00000138600.9	3.203e-05	0.110603	1.2349e-17
									Artery_Tibial	ENSG00000138600.9	0.000342721	0.0970598	3.39003e-31
									Brain_Cerebellar_Hemisphere	ENSG00000273674.4	5.1426e-06	0.386311	5.29283e-07
									Brain_Cerebellum	ENSG00000273674.4	0.000126959	0.325633	1.09078e-09
									Brain_Nucleus_accumbens_basal_ganglia	ENSG00000273674.4	2.69514e-05	0.349632	1.16695e-05
									Cells_Cultured_fibroblasts	ENSG00000092439.13	2.46125e-08	0.10572	1.68999e-06
									Cells_Cultured_fibroblasts	ENSG00000138600.9	5.93132e-09	0.223436	3.33303e-60
									Esophagus_Muscularis	ENSG00000138600.9	9.16301e-05	0.104227	7.39461e-13
									Esophagus_Muscularis	ENSG00000273674.4	0.000304306	0.195163	2.82624e-06
									Lung	ENSG00000138600.9	3.36318e-05	0.109388	3.30842e-14
									Muscle_Skeletal	ENSG00000138600.9	2.30259e-07	0.117378	4.71e-13
									Skin_Not_Sun_Exposed_Suprapubic	ENSG00000242737.1	6.4791e-06	0.22828	0.00717863
									Skin_Not_Sun_Exposed_Suprapubic	ENSG00000259668.5	0.00029693	-0.166792	0.0207817
									Testis	ENSG00000081014.10	0.000231568	0.127858	3.23966e-12
									Testis	ENSG00000138592.13	2.44877e-10	0.194364	9.59725e-09
									Testis	ENSG00000170236.14	5.34409e-09	-0.137569	2.14528e-11
									Testis	ENSG00000259618.1	6.04553e-06	0.182311	3.52374e-11
									Whole_Blood	ENSG00000138592.13	2.21805e-06	-0.0673013	7.45769e-16
	rs3098176	0	0.9598	non-coding;intronic	0.4254	polyphen_0_0:sift_0_0	0_0	mirbase_0_0:tarbase_0:mirna_0_0:targetscan__0	0	0	NA	NA	NA	0	encode_H3K36me3_Monocytes-CD14+;encode_H3K36me3_CD14 positive monocyte;encode_H3K36me3_MCF 7;encode_H3K36me3_bipolar neuron;encode_H3K36me3_SK N SH;encode_H3K36me3_HepG2;encode_H3K36me3_HMEC;encode_H3K36me3_HCT116;encode_H3K36me3_DND-41;encode_H3K36me3_NHDF-AD;encode_H3K36me3_NH-A;encode_H3K36me3_HUVEC;encode_H3K36me3_HeLa S3;encode_H3K36me3_mammary epithelial cell;encode_H3K36me3_Osteobl	roadmap_H3K36me3_neural stem progenitor cell;roadmap_H3K36me3_Monocytes-CD14+ (PB) Roadmap;roadmap_H3K36me3_common myeloid progenitor CD34 positive;roadmap_H3K36me3_common myeloid progenitor CD34 positive ENCSR337XXD 1;roadmap_H3K36me3_T cells (PB) Roadmap;roadmap_H3K36me3_Placenta;roadmap_H3K36me3_endodermal cell;roadmap_H3K36me3_neuron;roadmap_H3K36me3_Natural Killer cells (PB);roadmap_H3K36me3…	0		Evi1, TATA, Zfp105	6	cadd_0.49:deepsea_0.69826:eigen_-0.864263:fathmm_0.10454_AB:fitcons_0.322412:funseq2_0.580878:gwava_0.24:remm_0.013	0_0_0	0	0	0
	rs3098177	chr15_50491580_G_A_b38	0.9758	5upstream;intronic;3downstream	0.4254	polyphen_0_0:sift_0_0	0_0	mirbase_0_0:tarbase_0:mirna_0_0:targetscan__0	Artery_Tibial	ENSG00000273674.4	0.000266476	0.179139	1.84286e-11	0	encode_H3K36me3_Monocytes-CD14+;encode_H3K36me3_CD14 positive monocyte;encode_H3K36me3_MCF 7;encode_H3K36me3_bipolar neuron;encode_H3K36me3_SK N SH;encode_H3K36me3_HepG2;encode_H3K36me3_DND-41;encode_H3K36me3_A673;encode_H3K36me3_keratinocyte;encode_H3K36me3_NHDF-AD;encode_H3K36me3_fibroblast of dermis;encode_H3K36me3_HSMM;encode_H3K36me3_skeletal muscle myoblast;encode_H3K36me3_HCT116;encode_H3K…	roadmap_H3K36me3_neural stem progenitor cell;roadmap_H3K36me3_Monocytes-CD14+ (PB) Roadmap;roadmap_H3K36me3_common myeloid progenitor CD34 positive;roadmap_H3K36me3_common myeloid progenitor CD34 positive ENCSR337XXD 1;roadmap_H3K36me3_T cells (PB) Roadmap;roadmap_H3K36me3_Placenta;roadmap_H3K36me3_neuron;roadmap_H3K36me3_Natural Killer cells (PB);roadmap_H3K36me3_HUES48;roadmap_H3K36me3_B cells …	0		Myf, Pax-5, p300	7	cadd_1.107;1.618:deepsea_0.23233;0.20551:eigen_-0.22873:fathmm_0.15004;0.059_AB:fitcons_0.106106:funseq2_0.580878:gwava_0.19:remm_0.011	0_0_0	0	0	0
									Brain_Cerebellar_Hemisphere	ENSG00000273674.4	5.29961e-06	0.389711	5.29283e-07
									Brain_Cerebellum	ENSG00000273674.4	0.000144612	0.328956	1.09078e-09
									Brain_Nucleus_accumbens_basal_ganglia	ENSG00000273674.4	9.31896e-06	0.361592	1.16695e-05
									Cells_Cultured_fibroblasts	ENSG00000092439.13	7.3169e-06	0.0840221	1.68999e-06
									Esophagus_Mucosa	ENSG00000092439.13	0.000181072	0.0800593	0.00210643
									Esophagus_Muscularis	ENSG00000273674.4	0.000104604	0.20532	2.82624e-06
									Muscle_Skeletal	ENSG00000092439.13	9.33158e-05	-0.113581	5.27509e-09
									Muscle_Skeletal	ENSG00000138600.9	6.58318e-05	0.0900859	4.71e-13
									Prostate	ENSG00000242737.1	1.28636e-05	0.346186	0.0136367
									Skin_Not_Sun_Exposed_Suprapubic	ENSG00000242737.1	1.12827e-05	0.218792	0.00717863
									Testis	ENSG00000081014.10	9.95543e-05	0.131918	3.23966e-12
									Testis	ENSG00000138592.13	1.17835e-09	0.183103	9.59725e-09
									Testis	ENSG00000170236.14	1.42732e-05	-0.101414	2.14528e-11
									Testis	ENSG00000259618.1	0.00018444	0.148178	3.52374e-11
									Whole_Blood	ENSG00000138592.13	1.31413e-06	-0.0680488	7.45769e-16
	rs3098205	chr15_50450780_G_T_b38	0.8202	intronic;3downstream;non-coding intronic	0.4682	polyphen_0_0:sift_0_0	0_0	mirbase_0_0:tarbase_0:mirna_0_0:targetscan__0	Artery_Tibial	ENSG00000138592.13	0.000244245	0.0737202	3.37856e-23	0	encode_H3K36me3_DND-41;encode_H3K36me3_Monocytes-CD14+;encode_H3K36me3_CD14 positive monocyte;encode_H3K4me1_endothelial cell of umbilical vein;encode_H3K4me1_HUVEC;encode_H3K36me3_bipolar neuron;encode_H3K36me3_A549;encode_H3K36me3_A549 ENCSR797CXN;encode_H3K4me1_GM12878;encode_H3K4me1_Osteobl;encode_H3K4me1_GM12878 ENCSR447YYN;encode_H3K36me3_GM12878;encode_H3K36me3_MCF 7;encode_Pbx3_SK N SH;en…	roadmap_H3K36me3_neural stem progenitor cell;roadmap_H3K36me3_common myeloid progenitor CD34 positive ENCSR337XXD 1;roadmap_H3K36me3_B cells (PB) Roadmap;roadmap_H3K36me3_CD4 positive alpha beta T cell ENCSR948ZKZ;roadmap_H3K36me3_Monocytes-CD14+ (PB) Roadmap;roadmap_H3K36me3_neutrophil;roadmap_H3K36me3_Fetal Adrenal Gland;roadmap_H3K36me3_Fetal Muscle Trunk;roadmap_H3K36me3_Fetal Thymus;roadmap_…	0	GATA2	BCL, Bach, Hoxd10, PLZF, RXRA, TATA	5	cadd_0.833:deepsea_0.1105:eigen_-0.474181:fathmm_0.0962_ALL:fitcons_0.048788:funseq2_0.580878:gwava_0.18:remm_0.029	0_0_0	0	0	0
									Brain_Cerebellar_Hemisphere	ENSG00000273674.4	6.23203e-05	0.347686	5.29283e-07
									Brain_Nucleus_accumbens_basal_ganglia	ENSG00000273674.4	1.38703e-06	0.397245	1.16695e-05
									Cells_Cultured_fibroblasts	ENSG00000092439.13	4.31876e-07	0.0928295	1.68999e-06
									Cells_Cultured_fibroblasts	ENSG00000138600.9	3.80683e-05	0.15426	3.33303e-60
									Esophagus_Mucosa	ENSG00000092439.13	1.4412e-05	0.0910002	0.00210643
									Esophagus_Muscularis	ENSG00000273674.4	0.000118364	0.200449	2.82624e-06
									Muscle_Skeletal	ENSG00000092439.13	2.40601e-05	-0.119556	5.27509e-09
									Muscle_Skeletal	ENSG00000138600.9	1.94459e-07	0.114023	4.71e-13
									Skin_Not_Sun_Exposed_Suprapubic	ENSG00000242737.1	0.000216196	0.18061	0.00717863
									Testis	ENSG00000081014.10	2.5545e-05	0.137743	3.23966e-12
									Testis	ENSG00000138592.13	3.95772e-07	0.149222	9.59725e-09
									Testis	ENSG00000170236.14	2.22885e-05	-0.0959589	2.14528e-11
									Whole_Blood	ENSG00000138592.13	4.39813e-05	-0.0568165	7.45769e-16
	rs3131559	chr15_50488017_C_A_b38	0.8633	5upstream;intronic	0.3986	polyphen_0_0:sift_0_0	0_0	mirbase_0_0:tarbase_0:mirna_0_0:targetscan__0	Adipose_Subcutaneous	ENSG00000138600.9	1.048e-05	0.134856	8.36314e-30	0	encode_H3K36me3_Monocytes-CD14+;encode_H3K36me3_CD14 positive monocyte;encode_H3K36me3_DND-41;encode_H3K36me3_A549;encode_H3K36me3_A549 ENCSR797CXN;encode_H3K36me3_SK N SH;encode_H3K36me3_HeLa S3;encode_H3K36me3_NHEK;encode_H3K36me3_HSMM;encode_H3K36me3_skeletal muscle myoblast;encode_H3K36me3_MCF 7;encode_H3K36me3_Osteobl;encode_H3K36me3_GM12878;encode_H3K36me3_PC 3;encode_H3K36me3_Karpas 422;en…	roadmap_H3K36me3_neural stem progenitor cell;roadmap_H3K36me3_Monocytes-CD14+ (PB) Roadmap;roadmap_H3K36me3_common myeloid progenitor CD34 positive;roadmap_H3K36me3_HUES64;roadmap_H3K36me3_common myeloid progenitor CD34 positive ENCSR337XXD 1;roadmap_H3K36me3_T cells (PB) Roadmap;roadmap_H3K4me1_B cells (PB) Roadmap;roadmap_H3K36me3_neutrophil;roadmap_H3K36me3_common myeloid progenitor CD34 posit…	0		Pou3f2, TATA	5	cadd_0.285:deepsea_0.31492:eigen_-0.726949:fathmm_0.02239_AB:fitcons_0.106106:funseq2_0.580878:gwava_0.15:remm_0.008	0_0_0	0	0	0
									Adipose_Visceral_Omentum	ENSG00000138600.9	3.203e-05	0.110603	1.2349e-17
									Artery_Tibial	ENSG00000138600.9	0.000342721	0.0970598	3.39003e-31
									Brain_Cerebellar_Hemisphere	ENSG00000273674.4	5.1426e-06	0.386311	5.29283e-07
									Brain_Cerebellum	ENSG00000273674.4	0.000126959	0.325633	1.09078e-09
									Brain_Nucleus_accumbens_basal_ganglia	ENSG00000273674.4	2.69514e-05	0.349632	1.16695e-05
									Cells_Cultured_fibroblasts	ENSG00000092439.13	2.46125e-08	0.10572	1.68999e-06
									Cells_Cultured_fibroblasts	ENSG00000138600.9	5.93132e-09	0.223436	3.33303e-60
									Esophagus_Muscularis	ENSG00000138600.9	9.16301e-05	0.104227	7.39461e-13
									Esophagus_Muscularis	ENSG00000273674.4	0.000304306	0.195163	2.82624e-06
									Lung	ENSG00000138600.9	3.36318e-05	0.109388	3.30842e-14
									Muscle_Skeletal	ENSG00000138600.9	2.30259e-07	0.117378	4.71e-13
									Skin_Not_Sun_Exposed_Suprapubic	ENSG00000242737.1	6.4791e-06	0.22828	0.00717863
									Skin_Not_Sun_Exposed_Suprapubic	ENSG00000259668.5	0.00029693	-0.166792	0.0207817
									Testis	ENSG00000081014.10	0.000231568	0.127858	3.23966e-12
									Testis	ENSG00000138592.13	2.44877e-10	0.194364	9.59725e-09
									Testis	ENSG00000170236.14	5.34409e-09	-0.137569	2.14528e-11
									Testis	ENSG00000259618.1	6.04553e-06	0.182311	3.52374e-11
									Whole_Blood	ENSG00000138592.13	2.21805e-06	-0.0673013	7.45769e-16
	rs3131560	chr15_50483365_T_C_b38	0.8136	intronic;3downstream	0.4702	polyphen_0_0:sift_0_0	0_0	mirbase_0_0:tarbase_0:mirna_0_0:targetscan__0	Artery_Tibial	ENSG00000138592.13	8.23965e-05	0.0781447	3.37856e-23	0	encode_H3K36me3_Monocytes-CD14+;encode_H3K36me3_CD14 positive monocyte;encode_H3K36me3_DND-41;encode_H3K36me3_Osteobl;encode_H3K36me3_MCF 7;encode_H3K36me3_bipolar neuron;encode_H3K36me3_SK N SH;encode_H3K36me3_HSMM;encode_H3K36me3_skeletal muscle myoblast;encode_H3K36me3_Karpas 422;encode_NFIC_K562;encode_H3K9me3_GM12878 ENCSR447YYN	roadmap_H3K36me3_neural stem progenitor cell;roadmap_H3K36me3_Monocytes-CD14+ (PB) Roadmap;roadmap_H3K36me3_B cells (PB) Roadmap;roadmap_H3K36me3_neuron;roadmap_H3K36me3_common myeloid progenitor CD34 positive;roadmap_H3K36me3_HUES64;roadmap_H3K36me3_neutrophil;roadmap_H3K36me3_common myeloid progenitor CD34 positive ENCSR337XXD 1;roadmap_H3K36me3_Placenta;roadmap_H3K36me3_endodermal cell;roadmap…	0		GR, Sox	6	cadd_5.769:deepsea_0.16677:eigen_-0.416689:fathmm_0.06598_AB:fitcons_0.088506:funseq2_0.580878:gwava_0.11:remm_0.027	0_0_0	0	0	0
									Brain_Cerebellar_Hemisphere	ENSG00000273674.4	4.23929e-05	0.355461	5.29283e-07
									Brain_Nucleus_accumbens_basal_ganglia	ENSG00000273674.4	7.82342e-07	0.407434	1.16695e-05
									Brain_Putamen_basal_ganglia	ENSG00000273674.4	9.89281e-05	0.378225	1.38903e-05
									Cells_Cultured_fibroblasts	ENSG00000092439.13	4.54732e-06	0.0836143	1.68999e-06
									Esophagus_Mucosa	ENSG00000092439.13	0.000129549	0.0796367	0.00210643
									Esophagus_Muscularis	ENSG00000273674.4	8.76778e-05	0.201706	2.82624e-06
									Muscle_Skeletal	ENSG00000092439.13	7.01891e-05	-0.112557	5.27509e-09
									Muscle_Skeletal	ENSG00000138600.9	1.30798e-06	0.106087	4.71e-13
									Muscle_Skeletal	ENSG00000241130.1	0.000318032	-0.126946	3.22303e-14
									Skin_Not_Sun_Exposed_Suprapubic	ENSG00000242737.1	0.000115011	0.186337	0.00717863
									Testis	ENSG00000081014.10	2.78853e-05	0.136698	3.23966e-12
									Testis	ENSG00000138592.13	1.17625e-07	0.155069	9.59725e-09
									Testis	ENSG00000170236.14	9.95515e-06	-0.0995304	2.14528e-11
									Whole_Blood	ENSG00000138592.13	4.01132e-05	-0.0566104	7.45769e-16
	rs3131562	chr15_50480282_C_T_b38	0.8633	intronic	0.3986	polyphen_0_0:sift_0_0	0_0	mirbase_0_0:tarbase_0:mirna_0_0:targetscan__0	Adipose_Subcutaneous	ENSG00000138600.9	1.048e-05	0.134856	8.36314e-30	0	encode_H3K36me3_Monocytes-CD14+;encode_H3K36me3_CD14 positive monocyte;encode_H3K36me3_bipolar neuron;encode_H3K36me3_A549;encode_H3K36me3_A549 ENCSR797CXN;encode_H3K36me3_MCF 7;encode_H3K36me3_DND-41;encode_H3K36me3_A673;encode_H3K36me3_NH-A;encode_H3K36me3_astrocyte;encode_H3K36me3_SK N SH;encode_H3K36me3_HSMM;encode_H3K36me3_skeletal muscle myoblast;encode_H4K20me1_Monocytes-CD14+;encode_H3K36…	roadmap_H3K36me3_neural stem progenitor cell;roadmap_H3K36me3_Monocytes-CD14+ (PB) Roadmap;roadmap_H3K36me3_B cells (PB) Roadmap;roadmap_H3K36me3_neuron;roadmap_H3K36me3_common myeloid progenitor CD34 positive;roadmap_H3K36me3_HUES64;roadmap_H3K36me3_neutrophil;roadmap_H3K36me3_common myeloid progenitor CD34 positive ENCSR337XXD 1;roadmap_H3K36me3_Placenta;roadmap_H3K36me3_endodermal cell;roadmap…	0		CEBPA, CEBPB	3a	cadd_6.805:deepsea_0.053188:eigen_0.022646:fathmm_0.04833_AB:fitcons_0.088506:funseq2_1.203713:gwava_0.09:remm_0.029	0_0_0	0	0	0
									Adipose_Visceral_Omentum	ENSG00000138600.9	3.203e-05	0.110603	1.2349e-17
									Artery_Tibial	ENSG00000138600.9	0.000325146	0.0972091	3.39003e-31
									Brain_Cerebellar_Hemisphere	ENSG00000273674.4	5.1426e-06	0.386311	5.29283e-07
									Brain_Cerebellum	ENSG00000273674.4	0.000126959	0.325633	1.09078e-09
									Brain_Nucleus_accumbens_basal_ganglia	ENSG00000273674.4	2.69514e-05	0.349632	1.16695e-05
									Cells_Cultured_fibroblasts	ENSG00000092439.13	4.50379e-08	0.103463	1.68999e-06
									Cells_Cultured_fibroblasts	ENSG00000138600.9	5.06119e-09	0.223724	3.33303e-60
									Esophagus_Muscularis	ENSG00000138600.9	9.16301e-05	0.104227	7.39461e-13
									Esophagus_Muscularis	ENSG00000273674.4	0.000304306	0.195163	2.82624e-06
									Lung	ENSG00000138600.9	3.36318e-05	0.109388	3.30842e-14
									Muscle_Skeletal	ENSG00000138600.9	2.30259e-07	0.117378	4.71e-13
									Skin_Not_Sun_Exposed_Suprapubic	ENSG00000242737.1	6.4791e-06	0.22828	0.00717863
									Skin_Not_Sun_Exposed_Suprapubic	ENSG00000259668.5	0.00029693	-0.166792	0.0207817
									Testis	ENSG00000081014.10	0.000231568	0.127858	3.23966e-12
									Testis	ENSG00000138592.13	2.44877e-10	0.194364	9.59725e-09
									Testis	ENSG00000170236.14	5.34409e-09	-0.137569	2.14528e-11
									Testis	ENSG00000259618.1	6.04553e-06	0.182311	3.52374e-11
									Whole_Blood	ENSG00000138592.13	2.03027e-06	-0.0674553	7.45769e-16
	rs3131566	chr15_50466465_T_C_b38	0.8136	intronic;5upstream;3downstream;non-coding intronic	0.4702	polyphen_0_0:sift_0_0	0_0	mirbase_0_0:tarbase_0:mirna_0_0:targetscan__0	Artery_Tibial	ENSG00000138592.13	8.23965e-05	0.0781447	3.37856e-23	0	encode_H3K36me3_Monocytes-CD14+;encode_H3K36me3_CD14 positive monocyte;encode_H3K36me3_A549;encode_H3K36me3_A549 ENCSR797CXN;encode_H3K36me3_NHDF-AD;encode_H3K36me3_bipolar neuron;encode_H3K27me3_Monocytes-CD14+;encode_H3K36me3_keratinocyte;encode_H3K36me3_NHEK;encode_H3K36me3_HCT116;encode_H3K36me3_GM12878;encode_H3K36me3_HeLa S3;encode_H3K4me1_bipolar neuron;encode_H3K36me3_endothelial cell of …	roadmap_H3K36me3_neural stem progenitor cell;roadmap_H3K36me3_Monocytes-CD14+ (PB) Roadmap;roadmap_H3K36me3_common myeloid progenitor CD34 positive;roadmap_H3K36me3_CD4 positive alpha beta T cell ENCSR948ZKZ;roadmap_H3K36me3_neutrophil;roadmap_H3K36me3_HUES64;roadmap_H3K36me3_Natural Killer cells (PB);roadmap_H3K4me1_HUES6;roadmap_H3K36me3_Placenta;roadmap_H3K4me1_HUES48;roadmap_H3K36me3_Fetal Ad…	regbuild_Enhancer_INACTIVE_Fetal Intestine Large;regbuild_Enhancer_INACTIVE_Fetal Intestine Small;regbuild_Enhancer_INACTIVE_Fetal Muscle Leg;regbuild_Enhancer_INACTIVE_Fetal Muscle Trunk;regbuild_Enhancer_INACTIVE_Fetal Stomach;regbuild_Enhancer_INACTIVE_Fetal Thymus;regbuild_Enhancer_INACTIVE_fibroblast of dermis;regbuild_Enhancer_INACTIVE_fibroblast of lung;regbuild_Enhancer_INACTIVE_Gastric;r…		E2F, Myc, ZBTB7A	6	cadd_0.055:deepsea_0.3493:eigen_-1.260296:fathmm_0.01822_AB:fitcons_0.062308:funseq2_0.736264:gwava_0.37:remm_0.011	0_0_0	0	0	0
									Brain_Cerebellar_Hemisphere	ENSG00000273674.4	4.23929e-05	0.355461	5.29283e-07
									Brain_Nucleus_accumbens_basal_ganglia	ENSG00000273674.4	7.82342e-07	0.407434	1.16695e-05
									Brain_Putamen_basal_ganglia	ENSG00000273674.4	9.89281e-05	0.378225	1.38903e-05
									Cells_Cultured_fibroblasts	ENSG00000092439.13	4.54732e-06	0.0836143	1.68999e-06
									Esophagus_Mucosa	ENSG00000092439.13	0.000129549	0.0796367	0.00210643
									Esophagus_Muscularis	ENSG00000273674.4	8.76778e-05	0.201706	2.82624e-06
									Muscle_Skeletal	ENSG00000092439.13	7.01891e-05	-0.112557	5.27509e-09
									Muscle_Skeletal	ENSG00000138600.9	1.30798e-06	0.106087	4.71e-13
									Muscle_Skeletal	ENSG00000241130.1	0.000318032	-0.126946	3.22303e-14
									Skin_Not_Sun_Exposed_Suprapubic	ENSG00000242737.1	0.000115011	0.186337	0.00717863
									Testis	ENSG00000081014.10	2.78853e-05	0.136698	3.23966e-12
									Testis	ENSG00000138592.13	1.17625e-07	0.155069	9.59725e-09
									Testis	ENSG00000170236.14	9.95515e-06	-0.0995304	2.14528e-11
									Whole_Blood	ENSG00000138592.13	4.01132e-05	-0.0566104	7.45769e-16
	rs3131568	chr15_50465524_C_T_b38	0.8169	non-coding intronic;3downstream;intronic;5upstream	0.4692	polyphen_0_0:sift_0_0	0_0	mirbase_0_0:tarbase_0:mirna_0_0:targetscan__0	Artery_Tibial	ENSG00000138592.13	9.47298e-05	0.0776756	3.37856e-23	ENCFF855EVV_CTCF_Testis_Adult37_ENCODE_GRCh38_.	encode_H3K36me3_Monocytes-CD14+;encode_H3K36me3_CD14 positive monocyte;encode_H4K20me1_Monocytes-CD14+;encode_H3K4me1_GM12878;encode_H3K36me3_DND-41;encode_H3K36me3_A549;encode_H3K36me3_A549 ENCSR797CXN;encode_H3K36me3_MCF 7;encode_H3K36me3_bipolar neuron;encode_H3K36me3_SK N SH;encode_NFKB_GM12891;encode_PU1_GM12891;encode_H3K36me3_endothelial cell of umbilical vein;encode_H3K27me3_Monocytes-CD1…	roadmap_H3K36me3_neural stem progenitor cell;roadmap_H3K36me3_Monocytes-CD14+ (PB) Roadmap;roadmap_H3K36me3_common myeloid progenitor CD34 positive;roadmap_H3K36me3_CD4 positive alpha beta T cell ENCSR948ZKZ;roadmap_H3K36me3_neutrophil;roadmap_H3K36me3_common myeloid progenitor CD34 positive ENCSR722JRY;roadmap_H3K36me3_HUES64;roadmap_H3K36me3_Natural Killer cells (PB);roadmap_H3K4me1_HUES6;roadm…	0	NFKB, PU1	Irf	4	cadd_0.784:deepsea_0.20601:eigen_-0.415523:fathmm_0.09994_ABC:fitcons_0.099367:funseq2_0.736264:gwava_0.18:remm_0.01	0_0_0	0	0	0
									Brain_Cerebellar_Hemisphere	ENSG00000273674.4	5.91472e-05	0.347173	5.29283e-07
									Brain_Nucleus_accumbens_basal_ganglia	ENSG00000273674.4	4.62788e-07	0.413868	1.16695e-05
									Cells_Cultured_fibroblasts	ENSG00000092439.13	3.3196e-06	0.0848517	1.68999e-06
									Esophagus_Mucosa	ENSG00000092439.13	0.000182714	0.0777297	0.00210643
									Esophagus_Muscularis	ENSG00000273674.4	9.91767e-05	0.199583	2.82624e-06
									Muscle_Skeletal	ENSG00000092439.13	8.92265e-05	-0.11086	5.27509e-09
									Muscle_Skeletal	ENSG00000138600.9	1.27124e-06	0.106123	4.71e-13
									Skin_Not_Sun_Exposed_Suprapubic	ENSG00000242737.1	0.000187054	0.1803	0.00717863
									Testis	ENSG00000081014.10	2.78853e-05	0.136698	3.23966e-12
									Testis	ENSG00000138592.13	1.17625e-07	0.155069	9.59725e-09
									Testis	ENSG00000170236.14	9.95515e-06	-0.0995304	2.14528e-11
									Whole_Blood	ENSG00000138592.13	5.34864e-05	-0.0557929	7.45769e-16
	rs3131574	chr15_50448742_C_A_b38	0.8202	non-coding intronic;intronic	0.4682	polyphen_0_0:sift_0_0	0_0	mirbase_0_0:tarbase_0:mirna_0_0:targetscan__0	Brain_Cerebellar_Hemisphere	ENSG00000273674.4	6.23203e-05	0.347686	5.29283e-07	0	encode_H3K79me2_GM12878;encode_H3K4me1_CD14 positive monocyte;encode_H3K4me1_Monocytes-CD14+;encode_H3K27ac_Monocytes-CD14+;encode_H3K36me3_DND-41;encode_DNase1_CD14 positive monocyte;encode_H3K36me3_GM12878;encode_H3K36me3_cardiac muscle cell;encode_H3K36me3_bipolar neuron;encode_H3K36me3_HSMM;encode_H3K36me3_Karpas 422	roadmap_H3K36me3_neural stem progenitor cell;roadmap_H3K36me3_endodermal cell;roadmap_H3K36me3_common myeloid progenitor CD34 positive;roadmap_H3K36me3_Fetal Intestine Large;roadmap_H3K4me1_Monocytes-CD14+ (PB) Roadmap;roadmap_H3K36me3_common myeloid progenitor CD34 positive ENCSR722JRY;roadmap_H3K36me3_iPS-20b;roadmap_H3K36me3_HUES64;roadmap_H3K4me1_neutrophil;roadmap_H3K36me3_common myeloid pro…	regbuild_Promoter Flanking Region_INACTIVE_A549;regbuild_Promoter Flanking Region_INACTIVE_A549 ENCSR797CXN;regbuild_Promoter Flanking Region_INACTIVE_A673;regbuild_Promoter Flanking Region_INACTIVE_Aorta;regbuild_Promoter Flanking Region_INACTIVE_astrocyte;regbuild_Promoter Flanking Region_INACTIVE_B cell ENCSR682AXR;regbuild_Promoter Flanking Region_INACTIVE_B cells (PB) Roadmap;regbuild_Promot…		GCNF, GR, Nr2f2, TCF12,VDR	5	cadd_2.387;1.684;1.788:deepsea_0.1383;0.19326;0.20054:eigen_-0.505159:fathmm_0.06013;0.06122;0.0351_ADB:fitcons_0.088506:funseq2_0.736264:gwava_0.12:remm_0.022	0_0_0	0	0	0
									Brain_Nucleus_accumbens_basal_ganglia	ENSG00000273674.4	9.90315e-07	0.400647	1.16695e-05
									Brain_Putamen_basal_ganglia	ENSG00000273674.4	8.88044e-05	0.378424	1.38903e-05
									Cells_Cultured_fibroblasts	ENSG00000092439.13	8.17233e-07	0.0903941	1.68999e-06
									Cells_Cultured_fibroblasts	ENSG00000138600.9	8.53139e-05	0.146891	3.33303e-60
									Esophagus_Mucosa	ENSG00000092439.13	1.3624e-05	0.0911518	0.00210643
									Esophagus_Muscularis	ENSG00000273674.4	0.000118364	0.200449	2.82624e-06
									Muscle_Skeletal	ENSG00000092439.13	2.73548e-05	-0.118681	5.27509e-09
									Muscle_Skeletal	ENSG00000138600.9	2.20258e-07	0.113463	4.71e-13
									Skin_Not_Sun_Exposed_Suprapubic	ENSG00000242737.1	0.000276033	0.177679	0.00717863
									Testis	ENSG00000081014.10	2.5545e-05	0.137743	3.23966e-12
									Testis	ENSG00000138592.13	3.95772e-07	0.149222	9.59725e-09
									Testis	ENSG00000170236.14	2.22885e-05	-0.0959589	2.14528e-11
									Whole_Blood	ENSG00000138592.13	6.68245e-05	-0.0554495	7.45769e-16
	rs34639682	0	0.9639	non-coding;3downstream;5upstream;3utr	0.4284	polyphen_0_0:sift_0_0	0_0	mirbase_0_0:tarbase_0:mirna_0_0:targetscan__0	0	0	NA	NA	NA	0	encode_H3K36me3_HeLa S3;encode_H3K36me3_HUVEC;encode_H3K36me3_skeletal muscle myoblast;encode_H3K36me3_HSMM;encode_H3K36me3_HCT116;encode_H3K36me3_cardiac muscle cell;encode_H3K36me3_A673;encode_H3K36me3_fibroblast of dermis;encode_H3K36me3_Monocytes-CD14+;encode_H3K36me3_CD14 positive monocyte;encode_H3K36me3_MCF 7;encode_H3K36me3_bipolar neuron;encode_H3K36me3_DND-41;encode_H3K36me3_SK N SH;enc…	roadmap_H3K36me3_neural stem progenitor cell;roadmap_H3K36me3_Monocytes-CD14+ (PB) Roadmap;roadmap_H3K36me3_common myeloid progenitor CD34 positive;roadmap_H3K36me3_common myeloid progenitor CD34 positive ENCSR337XXD 1;roadmap_H3K36me3_Natural Killer cells (PB);roadmap_H3K36me3_HUES64;roadmap_H3K36me3_iPS-20b;roadmap_H3K36me3_neutrophil;roadmap_H3K36me3_endodermal cell;roadmap_H3K36me3_CD4 positi…	0		Bcl6, Cdc5,HNF1, Ik2, Mef2, Pou5f1, STAT	5	cadd_0:deepsea_0.096543:eigen_0:fathmm_0_0:fitcons_0.322412:funseq2_0:gwava_0:remm_0.167	0_0_0	0	0	0
	rs36042420	0	0.956	3utr;non-coding;5upstream;3downstream	0.4284	polyphen_0_0:sift_0_0	0_0	mirbase_0_0:tarbase_0:mirna_0_0:targetscan__0	0	0	NA	NA	NA	0	encode_H3K36me3_Monocytes-CD14+;encode_H3K36me3_CD14 positive monocyte;encode_H3K36me3_MCF 7;encode_H3K36me3_bipolar neuron;encode_H3K36me3_DND-41;encode_H3K36me3_SK N SH;encode_H3K36me3_NH-A;encode_H3K36me3_A549;encode_H3K36me3_astrocyte;encode_H3K36me3_A549 ENCSR797CXN;encode_H3K36me3_HMEC;encode_H3K36me3_Karpas 422;encode_H3K36me3_Osteobl;encode_H3K36me3_NHEK;encode_H3K36me3_A673;encode_H3K36m…	roadmap_H3K36me3_Fetal Adrenal Gland;roadmap_H3K36me3_B cells (PB) Roadmap;roadmap_H3K36me3_neuron;roadmap_H3K36me3_T cells (PB) Roadmap;roadmap_H3K36me3_H1 hESC;roadmap_H3K36me3_IMR 90;roadmap_H3K36me3_CD4 positive alpha beta T cell;roadmap_H3K36me3_lung ENCSR465WKM;roadmap_H3K27ac_CD4 positive alpha beta T cell;roadmap_H3K36me3_CD4 positive alpha beta memory T cell;roadmap_H3K36me3_effector mem…	0		Evi1, HDAC2, Irf, Zfp105, p300	6	cadd_0:deepsea_0.12215:eigen_0:fathmm_0_0:fitcons_0.322412:funseq2_0:gwava_0:remm_0.359	0_0_0	0	0	0
	rs4318151	chr15_50437077_A_G_b38	0.871	intronic;non-coding intronic;5upstream	0.3986	polyphen_0_0:sift_0_0	0_0	mirbase_0_0:tarbase_0:mirna_0_0:targetscan__0	Adipose_Subcutaneous	ENSG00000138600.9	5.19873e-06	0.139375	8.36314e-30	0	encode_H3K79me2_GM12878;encode_H3K79me2_HeLa-S3;encode_H3K79me2_HSMM;encode_H3K79me2_HSMMtube;encode_H4K20me1_Monocytes-CD14+;encode_H3K36me3_Monocytes-CD14+;encode_H3K36me3_CD14 positive monocyte;encode_H3K36me3_DND-41;encode_H4K20me1_NH-A;encode_H3K4me1_K562;encode_H3K36me3_A673;encode_H4K20me1_HSMMtube	roadmap_H3K36me3_Monocytes-CD14+ (PB) Roadmap;roadmap_H3K36me3_neural stem progenitor cell;roadmap_H3K36me3_common myeloid progenitor CD34 positive ENCSR722JRY;roadmap_H3K36me3_common myeloid progenitor CD34 positive;roadmap_H3K36me3_Fetal Stomach;roadmap_H3K36me3_Fetal Intestine Small;roadmap_H3K36me3_IMR 90;roadmap_H3K79me2_IMR 90;roadmap_H3K79me2_IMR90;roadmap_H3K36me3_HUES6	0		Cdx	1f	cadd_0.081:deepsea_0.48584:eigen_-0.733786:fathmm_0.04902_AB:fitcons_0.088506:funseq2_0.580878:gwava_0.1:remm_0.007	0_0_0	0	0	0
									Adipose_Visceral_Omentum	ENSG00000138600.9	8.20931e-06	0.117824	1.2349e-17
									Artery_Tibial	ENSG00000138600.9	0.000274011	0.0977655	3.39003e-31
									Brain_Cerebellar_Hemisphere	ENSG00000273674.4	3.71672e-06	0.391913	5.29283e-07
									Brain_Nucleus_accumbens_basal_ganglia	ENSG00000273674.4	4.66297e-05	0.343614	1.16695e-05
									Cells_Cultured_fibroblasts	ENSG00000092439.13	5.29182e-08	0.102686	1.68999e-06
									Cells_Cultured_fibroblasts	ENSG00000138600.9	1.17104e-08	0.217989	3.33303e-60
									Esophagus_Muscularis	ENSG00000138600.9	6.93392e-05	0.106146	7.39461e-13
									Lung	ENSG00000138600.9	3.37049e-05	0.109169	3.30842e-14
									Muscle_Skeletal	ENSG00000138600.9	1.06858e-07	0.12003	4.71e-13
									Nerve_Tibial	ENSG00000138600.9	0.000314605	0.0967317	3.07578e-22
									Skin_Not_Sun_Exposed_Suprapubic	ENSG00000242737.1	3.56149e-06	0.233104	0.00717863
									Testis	ENSG00000081014.10	0.000239875	0.127288	3.23966e-12
									Testis	ENSG00000138592.13	1.80148e-10	0.195299	9.59725e-09
									Testis	ENSG00000170236.14	3.32586e-09	-0.139013	2.14528e-11
									Testis	ENSG00000259618.1	5.03769e-06	0.183418	3.52374e-11
									Whole_Blood	ENSG00000138592.13	5.9828e-06	-0.0640717	7.45769e-16
	rs56398519	chr15_50481235_A_G_b38	0.9758	intronic	0.5746	polyphen_0_0:sift_0_0	0_0	mirbase_0_0:tarbase_0:mirna_0_0:targetscan__0	Artery_Tibial	ENSG00000273674.4	5.0816e-05	-0.203527	1.84286e-11	ENCFF300WML_CTCF_Testis_Adult37_ENCODE_GRCh38_.	encode_H3K36me3_Monocytes-CD14+;encode_H3K36me3_CD14 positive monocyte;encode_H3K36me3_MCF 7;encode_H3K36me3_DND-41;encode_H3K36me3_SK N SH;encode_H3K36me3_HSMM;encode_H3K36me3_skeletal muscle myoblast;encode_H4K20me1_Monocytes-CD14+;encode_H3K36me3_GM12878;encode_H3K36me3_A549 ENCSR797CXN;encode_H3K36me3_A549;encode_H3K36me3_NHEK;encode_H3K36me3_astrocyte;encode_H3K36me3_NH-A;encode_H3K36me3_NHL…	roadmap_H3K36me3_neural stem progenitor cell;roadmap_H3K36me3_Monocytes-CD14+ (PB) Roadmap;roadmap_H3K36me3_B cells (PB) Roadmap;roadmap_H3K36me3_neuron;roadmap_H3K36me3_common myeloid progenitor CD34 positive;roadmap_H3K36me3_HUES64;roadmap_H3K36me3_neutrophil;roadmap_H3K36me3_common myeloid progenitor CD34 positive ENCSR337XXD 1;roadmap_H3K36me3_Placenta;roadmap_H3K36me3_endodermal cell;roadmap…	regbuild_Promoter Flanking Region_INACTIVE_A549;regbuild_Promoter Flanking Region_INACTIVE_A549 ENCSR797CXN;regbuild_Promoter Flanking Region_INACTIVE_A673;regbuild_Promoter Flanking Region_INACTIVE_Aorta;regbuild_Promoter Flanking Region_INACTIVE_astrocyte;regbuild_Promoter Flanking Region_ACTIVE_B cell ENCSR682AXR;regbuild_Promoter Flanking Region_INACTIVE_B cells (PB) Roadmap;regbuild_Promoter…		FAC1, Foxj1, Sox	5	cadd_0.549:deepsea_0.12811:eigen_-0.240353:fathmm_0.0742_AB:fitcons_0.099367:funseq2_0.580878:gwava_0.12:remm_0.482	0_0_0	0	0	0
									Brain_Cerebellar_Hemisphere	ENSG00000273674.4	5.83071e-06	-0.398308	5.29283e-07
									Brain_Cerebellum	ENSG00000273674.4	0.000127401	-0.332843	1.09078e-09
									Brain_Nucleus_accumbens_basal_ganglia	ENSG00000273674.4	8.21114e-06	-0.367581	1.16695e-05
									Brain_Putamen_basal_ganglia	ENSG00000273674.4	7.98972e-05	-0.385704	1.38903e-05
									Cells_Cultured_fibroblasts	ENSG00000092439.13	8.52695e-07	-0.0926842	1.68999e-06
									Cells_Cultured_fibroblasts	ENSG00000138600.9	0.000302409	-0.138935	3.33303e-60
									Esophagus_Mucosa	ENSG00000092439.13	3.79734e-05	-0.0895544	0.00210643
									Muscle_Skeletal	ENSG00000092439.13	6.4559e-05	0.117192	5.27509e-09
									Muscle_Skeletal	ENSG00000138600.9	2.10788e-06	-0.107777	4.71e-13
									Skin_Not_Sun_Exposed_Suprapubic	ENSG00000242737.1	1.08385e-05	-0.223122	0.00717863
									Skin_Sun_Exposed_Lower_leg	ENSG00000273674.4	0.000143232	-0.192257	3.30667e-07
									Testis	ENSG00000081014.10	5.60779e-05	-0.138055	3.23966e-12
									Testis	ENSG00000138592.13	2.56803e-09	-0.181701	9.59725e-09
									Testis	ENSG00000170236.14	1.04344e-05	0.104183	2.14528e-11
									Thyroid	ENSG00000081014.10	0.000322179	-0.0930518	0.0811369
									Thyroid	ENSG00000273674.4	0.000367115	-0.178538	1.3765e-07
									Whole_Blood	ENSG00000138592.13	2.53365e-07	0.0732099	7.45769e-16
	rs7174015	chr15_50424871_G_A_b38	1	non-coding intronic;intronic;5upstream	0.4215	polyphen_0_0:sift_0_0	0_0	mirbase_0_0:tarbase_0:mirna_0_0:targetscan__0	Artery_Tibial	ENSG00000273674.4	0.000216121	0.181825	1.84286e-11	ENCFF610XSK_H3K27ac_Testis_Adult54_ENCODE_GRCh38_Peak_5325;ENCFF819NRA_H3K27ac_Testis_Adult37_ENCODE_GRCh38_Peak_5115;ENCFF286DAB_H3K4me3_Testis_Adult37_ENCODE_GRCh38_Peak_1100;ENCFF855EVV_CTCF_Testis_Adult37_ENCODE_GRCh38_.;ENCFF509DBT_H3K4me3_Testis_Adult54_ENCODE_GRCh38_Peak_2292	encode_DNase1_Monocytes-CD14+;encode_Yy1_GM12878;encode_BCLAF1_GM12878;encode_DNase1_HeLa-S3;encode_SIN3A_K562;encode_Egr1_GM12878;encode_GABPA_SK N SH;encode_ESRRA_K562;encode_HDAC1_K562;encode_ZNF24_K562;encode_RFX5_SK N SH;encode_SREBF1_A549 ENCSR797CXN;encode_H3K4me3_H1ESC;encode_H3K27ac_HMEC;encode_H3K27ac_mammary epithelial cell;encode_H3K4me3_HepG2;encode_H3K79me2_HeLa-S3;encode_ELK1_GM128…	roadmap_H3K4me1_T cells (PB) Roadmap;roadmap_H2AK5ac_IMR90;roadmap_H3K4me1_Fetal Thymus;roadmap_H4K8ac_IMR 90;roadmap_H4K8ac_IMR90;roadmap_H4K8ac_H1-trophoblast;roadmap_H3K27ac_Lung;roadmap_H3K4ac_IMR90;roadmap_DNase1_T cells (PB) Roadmap;roadmap_H3K27ac_Small Intestine;roadmap_H3K27ac_Fetal Stomach;roadmap_H3K27ac_common myeloid progenitor CD34 positive;roadmap_H3K27ac_Monocytes-CD14+ (PB) Roadm…	regbuild_Promoter_INACTIVE_A549;regbuild_Promoter_INACTIVE_A549 ENCSR797CXN;regbuild_Promoter_REPRESSED_A673;regbuild_Promoter_INACTIVE_Aorta;regbuild_Promoter_INACTIVE_astrocyte;regbuild_Promoter_INACTIVE_B cell ENCSR682AXR;regbuild_Promoter_INACTIVE_B cells (PB) Roadmap;regbuild_Promoter_INACTIVE_bipolar neuron;regbuild_Promoter_INACTIVE_brain;regbuild_Promoter_INACTIVE_cardiac muscle cell;regb…	BAFF155, ELF1		4	cadd_7.888;7.305:deepsea_0.023881;0.015285:eigen_1.263628:fathmm_0.24567;0.38127_ALL:fitcons_0.085055:funseq2_1.378127:gwava_0.66:remm_0.174	0_0_0	0	0	0
									Brain_Cerebellar_Hemisphere	ENSG00000273674.4	5.29961e-06	0.389711	5.29283e-07
									Brain_Cerebellum	ENSG00000273674.4	0.000138165	0.329615	1.09078e-09
									Brain_Nucleus_accumbens_basal_ganglia	ENSG00000273674.4	9.31896e-06	0.361592	1.16695e-05
									Cells_Cultured_fibroblasts	ENSG00000092439.13	7.13283e-06	0.084219	1.68999e-06
									Esophagus_Mucosa	ENSG00000092439.13	0.000283085	0.0777435	0.00210643
									Esophagus_Muscularis	ENSG00000273674.4	7.16878e-05	0.211437	2.82624e-06
									Muscle_Skeletal	ENSG00000092439.13	5.99913e-05	-0.116457	5.27509e-09
									Muscle_Skeletal	ENSG00000138600.9	0.00016635	0.0849409	4.71e-13
									Prostate	ENSG00000242737.1	2.29885e-05	0.339085	0.0136367
									Skin_Not_Sun_Exposed_Suprapubic	ENSG00000242737.1	6.95486e-06	0.225596	0.00717863
									Testis	ENSG00000081014.10	5.05685e-05	0.138159	3.23966e-12
									Testis	ENSG00000138592.13	1.14029e-09	0.184501	9.59725e-09
									Testis	ENSG00000170236.14	3.21206e-05	-0.0979703	2.14528e-11
									Testis	ENSG00000259618.1	0.0002328	0.146896	3.52374e-11
									Whole_Blood	ENSG00000138592.13	3.46872e-06	-0.0654427	7.45769e-16
	rs8026653	0	0.9758	intronic;non-coding intronic	0.5746	polyphen_0_0:sift_0_0	0_0	mirbase_0_0:tarbase_0:mirna_0_0:targetscan__0	0	0	NA	NA	NA	0	encode_H3K79me2_GM12878;encode_H3K36me3_Monocytes-CD14+;encode_H3K36me3_CD14 positive monocyte;encode_H3K36me3_DND-41;encode_H3K36me3_A549;encode_H3K36me3_A549 ENCSR797CXN;encode_H3K4me1_GM12878;encode_H3K4me1_GM12878 ENCSR447YYN;encode_H3K27ac_B cell ENCSR682AXR;encode_H3K4me1_B cell ENCSR682AXR;encode_H3K27ac_GM12878;encode_H3K27ac_GM12878 ENCSR447YYN;encode_NFATC3_GM12878 ENCSR447YYN;encode_ZN…	roadmap_H3K36me3_Fetal Stomach;roadmap_H3K36me3_neuron;roadmap_H3K36me3_Placenta;roadmap_H3K36me3_lung ENCSR465WKM;roadmap_H3K36me3_Fetal Muscle Leg;roadmap_H3K36me3_Fetal Intestine Large;roadmap_H3K36me3_Fetal Thymus;roadmap_H3K36me3_iPS-20b;roadmap_H3K4me1_B cells (PB) Roadmap;roadmap_H3K27ac_B cells (PB) Roadmap;roadmap_H3K36me3_T cells (PB) Roadmap;roadmap_H3K4me1_Natural Killer cells (PB);ro…	regbuild_Promoter Flanking Region_INACTIVE_CD4+ ab T cell (VB);regbuild_Promoter Flanking Region_INACTIVE_CD4 positive alpha beta memory T cell;regbuild_Promoter Flanking Region_INACTIVE_CD4 positive alpha beta T cell;regbuild_Promoter Flanking Region_INACTIVE_CD4 positive alpha beta T cell ENCSR948ZKZ;regbuild_Promoter Flanking Region_INACTIVE_CD4 positive CD25 positive alpha beta regulatory T c…		CEBPG, Foxa, Foxj1, Foxj2, Foxk1, Foxp1, Hoxa10, Hoxa9, Hoxb13, Hoxb9, Hoxd10, Mef2, Nkx6-1, Pax4	5	cadd_0.971;1.01:deepsea_0.34883;0.36542:eigen_-0.147639:fathmm_0.17243;0.11311_ABC:fitcons_0.088506:funseq2_0.736264:gwava_0.25:remm_0.024	0_0_0	0	0	0

## Sheet: Table_S6
Table S6. Overlap of the rs7174015 variant and its proxies with sQTL annotations from the GTEx project.
General_information						GTEX data for sQTL
Lead	refsnp_id	variant_id	R2	Predicted.Function	EUR.Frequency	tissue	gene_id	pval_nominal	slope	pval_beta
rs7174015	rs10152326	chr15_50450051_A_G_b38	0.8169	intronic;3downstream;non-coding intronic	0.4692	Cells_Cultured_fibroblasts	chr15:50482065:50489801:clu_16122:ENSG00000138592.13	2.31353e-07	-0.275111	2.5704e-52
						Muscle_Skeletal	chr15:50482065:50489801:clu_17873:ENSG00000138592.13	2.05654e-08	-0.290039	2.75887e-53
						Muscle_Skeletal	chr15:50648885:50657781:clu_17885:ENSG00000092439.13	9.77322e-08	0.279011	6.842e-07
						Nerve_Tibial	chr15:50648885:50657781:clu_20845:ENSG00000092439.13	1.86639e-07	0.336329	3.79371e-06
						Skin_Sun_Exposed_Lower_leg	chr15:50482065:50489801:clu_20698:ENSG00000138592.13	2.25787e-06	-0.251195	8.43118e-49
						Thyroid	chr15:50648885:50657781:clu_21465:ENSG00000092439.13	1.45272e-06	0.285809	0.0018295
	rs11070776	chr15_50443291_G_A_b38	0.9758	3downstream;intronic;non-coding intronic	0.4254	Artery_Tibial	chr15:50482065:50489801:clu_18610:ENSG00000138592.13	4.15011e-06	-0.261998	1.30195e-50
						Cells_Cultured_fibroblasts	chr15:50482065:50489801:clu_16122:ENSG00000138592.13	2.60984e-08	-0.298244	2.5704e-52
						Esophagus_Muscularis	chr15:50482065:50489801:clu_18618:ENSG00000138592.13	2.99259e-06	-0.295906	1.19053e-26
						Muscle_Skeletal	chr15:50482065:50489801:clu_17873:ENSG00000138592.13	2.86128e-10	-0.334326	2.75887e-53
						Muscle_Skeletal	chr15:50648885:50657781:clu_17885:ENSG00000092439.13	6.23713e-07	0.268508	6.842e-07
						Nerve_Tibial	chr15:50482065:50489801:clu_20829:ENSG00000138592.13	6.98554e-07	-0.289667	7.64589e-52
						Nerve_Tibial	chr15:50648885:50657781:clu_20845:ENSG00000092439.13	5.58402e-06	0.302847	3.79371e-06
						Skin_Not_Sun_Exposed_Suprapubic	chr15:50482065:50489801:clu_20197:ENSG00000138592.13	4.92075e-07	-0.272475	2.90317e-34
						Skin_Sun_Exposed_Lower_leg	chr15:50482065:50489801:clu_20698:ENSG00000138592.13	2.73074e-07	-0.276685	8.43118e-49
						Thyroid	chr15:50648885:50657781:clu_21465:ENSG00000092439.13	4.49366e-06	0.278441	0.0018295
	rs11417752	0	0.8169	intronic;non-coding intronic;3downstream	0	0	0	0	0	0
	rs12593481	chr15_50426079_T_C_b38	0.8242	5upstream;non-coding intronic;intronic	0.4692	Cells_Cultured_fibroblasts	chr15:50482065:50489801:clu_16122:ENSG00000138592.13	1.82143e-07	-0.276618	2.5704e-52
						Muscle_Skeletal	chr15:50482065:50489801:clu_17873:ENSG00000138592.13	5.50381e-09	-0.300029	2.75887e-53
						Muscle_Skeletal	chr15:50648885:50657781:clu_17885:ENSG00000092439.13	9.5426e-08	0.278014	6.842e-07
						Nerve_Tibial	chr15:50482065:50489801:clu_20829:ENSG00000138592.13	2.71565e-06	-0.264569	7.64589e-52
						Nerve_Tibial	chr15:50648885:50657781:clu_20845:ENSG00000092439.13	1.44158e-07	0.337232	3.79371e-06
						Skin_Sun_Exposed_Lower_leg	chr15:50482065:50489801:clu_20698:ENSG00000138592.13	8.86638e-07	-0.259897	8.43118e-49
						Thyroid	chr15:50648885:50657781:clu_21465:ENSG00000092439.13	1.01077e-06	0.289883	0.0018295
	rs2289108	chr15_50490138_G_A_b38	0.9758	non-coding intronic;intronic	0.5746	Cells_Cultured_fibroblasts	chr15:50482065:50489801:clu_16122:ENSG00000138592.13	2.07381e-07	0.281687	2.5704e-52
						Muscle_Skeletal	chr15:50482065:50489801:clu_17873:ENSG00000138592.13	1.9738e-08	0.299544	2.75887e-53
						Muscle_Skeletal	chr15:50648885:50657781:clu_17885:ENSG00000092439.13	2.69921e-07	-0.277871	6.842e-07
						Nerve_Tibial	chr15:50482065:50489801:clu_20829:ENSG00000138592.13	2.88056e-06	0.275364	7.64589e-52
						Nerve_Tibial	chr15:50648885:50657781:clu_20845:ENSG00000092439.13	2.09639e-06	-0.318164	3.79371e-06
						Skin_Not_Sun_Exposed_Suprapubic	chr15:50482065:50489801:clu_20197:ENSG00000138592.13	9.18471e-07	0.269096	2.90317e-34
	rs28582911	chr15_50437432_G_A_b38	0.9799	5upstream;non-coding intronic;intronic	0.4264	Artery_Tibial	chr15:50482065:50489801:clu_18610:ENSG00000138592.13	3.78347e-06	-0.262212	1.30195e-50
						Cells_Cultured_fibroblasts	chr15:50482065:50489801:clu_16122:ENSG00000138592.13	1.98127e-08	-0.299198	2.5704e-52
						Muscle_Skeletal	chr15:50482065:50489801:clu_17873:ENSG00000138592.13	1.56397e-10	-0.338539	2.75887e-53
						Muscle_Skeletal	chr15:50648885:50657781:clu_17885:ENSG00000092439.13	6.28195e-07	0.267986	6.842e-07
						Nerve_Tibial	chr15:50482065:50489801:clu_20829:ENSG00000138592.13	8.29587e-07	-0.286099	7.64589e-52
						Skin_Not_Sun_Exposed_Suprapubic	chr15:50482065:50489801:clu_20197:ENSG00000138592.13	6.86445e-07	-0.268192	2.90317e-34
						Skin_Sun_Exposed_Lower_leg	chr15:50482065:50489801:clu_20698:ENSG00000138592.13	2.74629e-07	-0.275168	8.43118e-49
						Thyroid	chr15:50648885:50657781:clu_21465:ENSG00000092439.13	5.92518e-06	0.275132	0.0018295
	rs3098167	chr15_50458272_T_C_b38	0.8136	non-coding intronic;intronic;5upstream	0.4702	Cells_Cultured_fibroblasts	chr15:50482065:50489801:clu_16122:ENSG00000138592.13	9.00329e-08	-0.282856	2.5704e-52
						Cells_EBV-transformed_lymphocytes	chr15:50482065:50489801:clu_14335:ENSG00000138592.13	7.37885e-07	-0.484921	1.01339e-14
						Muscle_Skeletal	chr15:50482065:50489801:clu_17873:ENSG00000138592.13	2.24939e-09	-0.30858	2.75887e-53
						Muscle_Skeletal	chr15:50648885:50657781:clu_17885:ENSG00000092439.13	5.86689e-08	0.283544	6.842e-07
						Nerve_Tibial	chr15:50482065:50489801:clu_20829:ENSG00000138592.13	1.36998e-06	-0.27294	7.64589e-52
						Nerve_Tibial	chr15:50648885:50657781:clu_20845:ENSG00000092439.13	1.57836e-07	0.337128	3.79371e-06
						Skin_Sun_Exposed_Lower_leg	chr15:50482065:50489801:clu_20698:ENSG00000138592.13	1.01056e-06	-0.259161	8.43118e-49
						Thyroid	chr15:50648885:50657781:clu_21465:ENSG00000092439.13	2.34478e-06	0.280993	0.0018295
	rs3098169	chr15_50462142_G_A_b38	0.8202	non-coding intronic;5upstream;intronic	0.4682	Cells_Cultured_fibroblasts	chr15:50482065:50489801:clu_16122:ENSG00000138592.13	2.19357e-07	-0.274298	2.5704e-52
						Cells_EBV-transformed_lymphocytes	chr15:50482065:50489801:clu_14335:ENSG00000138592.13	1.47017e-06	-0.476722	1.01339e-14
						Muscle_Skeletal	chr15:50482065:50489801:clu_17873:ENSG00000138592.13	8.85278e-09	-0.297444	2.75887e-53
						Muscle_Skeletal	chr15:50648885:50657781:clu_17885:ENSG00000092439.13	1.21921e-07	0.277061	6.842e-07
						Nerve_Tibial	chr15:50482065:50489801:clu_20829:ENSG00000138592.13	3.60572e-06	-0.262725	7.64589e-52
						Nerve_Tibial	chr15:50648885:50657781:clu_20845:ENSG00000092439.13	1.24628e-07	0.340682	3.79371e-06
						Skin_Sun_Exposed_Lower_leg	chr15:50482065:50489801:clu_20698:ENSG00000138592.13	1.82847e-06	-0.25329	8.43118e-49
						Thyroid	chr15:50648885:50657781:clu_21465:ENSG00000092439.13	1.97331e-06	0.282992	0.0018295
	rs3098171	chr15_50479314_C_G_b38	0.9758	intronic	0.4254	Artery_Tibial	chr15:50482065:50489801:clu_18610:ENSG00000138592.13	1.8901e-06	-0.271039	1.30195e-50
						Cells_Cultured_fibroblasts	chr15:50482065:50489801:clu_16122:ENSG00000138592.13	1.55557e-08	-0.30217	2.5704e-52
						Esophagus_Muscularis	chr15:50482065:50489801:clu_18618:ENSG00000138592.13	5.48126e-06	-0.288758	1.19053e-26
						Lung	chr15:50482065:50489801:clu_21280:ENSG00000138592.13	4.1348e-06	-0.193293	3.97221e-34
						Muscle_Skeletal	chr15:50482065:50489801:clu_17873:ENSG00000138592.13	2.21066e-10	-0.336145	2.75887e-53
						Muscle_Skeletal	chr15:50648885:50657781:clu_17885:ENSG00000092439.13	1.10792e-06	0.262384	6.842e-07
						Nerve_Tibial	chr15:50482065:50489801:clu_20829:ENSG00000138592.13	6.59416e-07	-0.289729	7.64589e-52
						Nerve_Tibial	chr15:50648885:50657781:clu_20845:ENSG00000092439.13	3.98925e-06	0.306835	3.79371e-06
						Skin_Not_Sun_Exposed_Suprapubic	chr15:50482065:50489801:clu_20197:ENSG00000138592.13	3.19088e-07	-0.277362	2.90317e-34
						Skin_Sun_Exposed_Lower_leg	chr15:50482065:50489801:clu_20698:ENSG00000138592.13	3.10381e-07	-0.274878	8.43118e-49
						Thyroid	chr15:50648885:50657781:clu_21465:ENSG00000092439.13	5.40297e-06	0.276854	0.0018295
	rs3098174	chr15_50486656_C_T_b38	0.8633	intronic	0.3986	Artery_Tibial	chr15:50482065:50489801:clu_18610:ENSG00000138592.13	1.35599e-07	-0.302965	1.30195e-50
						Breast_Mammary_Tissue	chr15:50482065:50489801:clu_20345:ENSG00000138592.13	1.83243e-08	-0.380713	4.9582e-22
						Cells_Cultured_fibroblasts	chr15:50482065:50489801:clu_16122:ENSG00000138592.13	4.54641e-10	-0.339695	2.5704e-52
						Colon_Transverse	chr15:50482065:50489801:clu_19704:ENSG00000138592.13	7.3487e-07	-0.331218	1.13926e-21
						Esophagus_Mucosa	chr15:50482065:50489801:clu_18739:ENSG00000138592.13	5.34009e-06	-0.263089	2.50702e-31
						Esophagus_Muscularis	chr15:50482065:50489801:clu_18618:ENSG00000138592.13	3.15749e-07	-0.328922	1.19053e-26
						Lung	chr15:50482065:50489801:clu_21280:ENSG00000138592.13	2.92631e-08	-0.234106	3.97221e-34
						Muscle_Skeletal	chr15:50482065:50489801:clu_17873:ENSG00000138592.13	2.08114e-12	-0.375407	2.75887e-53
						Muscle_Skeletal	chr15:50725323:50726321:clu_17888:ENSG00000138600.9	9.02378e-06	0.191402	4.35622e-08
						Nerve_Tibial	chr15:50482065:50489801:clu_20829:ENSG00000138592.13	3.41252e-08	-0.3242	7.64589e-52
						Nerve_Tibial	chr15:50648885:50657781:clu_20845:ENSG00000092439.13	4.17724e-06	0.309616	3.79371e-06
						Skin_Not_Sun_Exposed_Suprapubic	chr15:50482065:50489801:clu_20197:ENSG00000138592.13	6.08771e-08	-0.29495	2.90317e-34
						Skin_Sun_Exposed_Lower_leg	chr15:50482065:50489801:clu_20698:ENSG00000138592.13	3.32992e-09	-0.319157	8.43118e-49
						Stomach	chr15:50482065:50489801:clu_18169:ENSG00000138592.13	1.34828e-06	-0.334692	9.15676e-15
						Thyroid	chr15:50482065:50489801:clu_21447:ENSG00000138592.13	7.17166e-07	-0.25816	4.3381e-30
						Thyroid	chr15:50648885:50657781:clu_21465:ENSG00000092439.13	1.44007e-06	0.299377	0.0018295
	rs3098176	0	0.9598	non-coding;intronic	0.4254	0	0	0	0	0
	rs3098177	chr15_50491580_G_A_b38	0.9758	5upstream;intronic;3downstream	0.4254	Artery_Tibial	chr15:50482065:50489801:clu_18610:ENSG00000138592.13	2.17813e-06	-0.269842	1.30195e-50
						Cells_Cultured_fibroblasts	chr15:50482065:50489801:clu_16122:ENSG00000138592.13	1.27846e-08	-0.304094	2.5704e-52
						Esophagus_Muscularis	chr15:50482065:50489801:clu_18618:ENSG00000138592.13	5.48126e-06	-0.288758	1.19053e-26
						Lung	chr15:50482065:50489801:clu_21280:ENSG00000138592.13	4.1348e-06	-0.193293	3.97221e-34
						Muscle_Skeletal	chr15:50482065:50489801:clu_17873:ENSG00000138592.13	1.85534e-10	-0.337968	2.75887e-53
						Muscle_Skeletal	chr15:50648885:50657781:clu_17885:ENSG00000092439.13	1.02487e-06	0.263539	6.842e-07
						Nerve_Tibial	chr15:50482065:50489801:clu_20829:ENSG00000138592.13	4.26922e-07	-0.294904	7.64589e-52
						Nerve_Tibial	chr15:50648885:50657781:clu_20845:ENSG00000092439.13	3.94407e-06	0.307432	3.79371e-06
						Skin_Not_Sun_Exposed_Suprapubic	chr15:50482065:50489801:clu_20197:ENSG00000138592.13	3.19088e-07	-0.277362	2.90317e-34
						Skin_Sun_Exposed_Lower_leg	chr15:50482065:50489801:clu_20698:ENSG00000138592.13	1.95458e-07	-0.279855	8.43118e-49
						Thyroid	chr15:50648885:50657781:clu_21465:ENSG00000092439.13	5.40297e-06	0.276854	0.0018295
	rs3098205	chr15_50450780_G_T_b38	0.8202	intronic;3downstream;non-coding intronic	0.4682	Cells_Cultured_fibroblasts	chr15:50482065:50489801:clu_16122:ENSG00000138592.13	9.78963e-07	-0.262595	2.5704e-52
						Muscle_Skeletal	chr15:50482065:50489801:clu_17873:ENSG00000138592.13	4.9717e-07	-0.260399	2.75887e-53
						Muscle_Skeletal	chr15:50648885:50657781:clu_17885:ENSG00000092439.13	7.06929e-08	0.281753	6.842e-07
						Nerve_Tibial	chr15:50648885:50657781:clu_20845:ENSG00000092439.13	4.05687e-08	0.353775	3.79371e-06
						Thyroid	chr15:50648885:50657781:clu_21465:ENSG00000092439.13	1.03736e-06	0.290866	0.0018295
	rs3131559	chr15_50488017_C_A_b38	0.8633	5upstream;intronic	0.3986	Artery_Tibial	chr15:50482065:50489801:clu_18610:ENSG00000138592.13	1.35599e-07	-0.302965	1.30195e-50
						Breast_Mammary_Tissue	chr15:50482065:50489801:clu_20345:ENSG00000138592.13	1.83243e-08	-0.380713	4.9582e-22
						Cells_Cultured_fibroblasts	chr15:50482065:50489801:clu_16122:ENSG00000138592.13	4.54641e-10	-0.339695	2.5704e-52
						Colon_Transverse	chr15:50482065:50489801:clu_19704:ENSG00000138592.13	7.3487e-07	-0.331218	1.13926e-21
						Esophagus_Mucosa	chr15:50482065:50489801:clu_18739:ENSG00000138592.13	5.34009e-06	-0.263089	2.50702e-31
						Esophagus_Muscularis	chr15:50482065:50489801:clu_18618:ENSG00000138592.13	3.15749e-07	-0.328922	1.19053e-26
						Lung	chr15:50482065:50489801:clu_21280:ENSG00000138592.13	2.92631e-08	-0.234106	3.97221e-34
						Muscle_Skeletal	chr15:50482065:50489801:clu_17873:ENSG00000138592.13	2.08114e-12	-0.375407	2.75887e-53
						Muscle_Skeletal	chr15:50725323:50726321:clu_17888:ENSG00000138600.9	9.02378e-06	0.191402	4.35622e-08
						Nerve_Tibial	chr15:50482065:50489801:clu_20829:ENSG00000138592.13	3.41252e-08	-0.3242	7.64589e-52
						Nerve_Tibial	chr15:50648885:50657781:clu_20845:ENSG00000092439.13	4.17724e-06	0.309616	3.79371e-06
						Skin_Not_Sun_Exposed_Suprapubic	chr15:50482065:50489801:clu_20197:ENSG00000138592.13	6.08771e-08	-0.29495	2.90317e-34
						Skin_Sun_Exposed_Lower_leg	chr15:50482065:50489801:clu_20698:ENSG00000138592.13	3.32992e-09	-0.319157	8.43118e-49
						Stomach	chr15:50482065:50489801:clu_18169:ENSG00000138592.13	1.34828e-06	-0.334692	9.15676e-15
						Thyroid	chr15:50482065:50489801:clu_21447:ENSG00000138592.13	7.17166e-07	-0.25816	4.3381e-30
						Thyroid	chr15:50648885:50657781:clu_21465:ENSG00000092439.13	1.44007e-06	0.299377	0.0018295
	rs3131560	chr15_50483365_T_C_b38	0.8136	intronic;3downstream	0.4702	Cells_Cultured_fibroblasts	chr15:50482065:50489801:clu_16122:ENSG00000138592.13	9.00329e-08	-0.282856	2.5704e-52
						Cells_EBV-transformed_lymphocytes	chr15:50482065:50489801:clu_14335:ENSG00000138592.13	7.37885e-07	-0.484921	1.01339e-14
						Muscle_Skeletal	chr15:50482065:50489801:clu_17873:ENSG00000138592.13	2.24939e-09	-0.30858	2.75887e-53
						Muscle_Skeletal	chr15:50648885:50657781:clu_17885:ENSG00000092439.13	5.86689e-08	0.283544	6.842e-07
						Nerve_Tibial	chr15:50482065:50489801:clu_20829:ENSG00000138592.13	1.36998e-06	-0.27294	7.64589e-52
						Nerve_Tibial	chr15:50648885:50657781:clu_20845:ENSG00000092439.13	1.57836e-07	0.337128	3.79371e-06
						Skin_Sun_Exposed_Lower_leg	chr15:50482065:50489801:clu_20698:ENSG00000138592.13	1.01056e-06	-0.259161	8.43118e-49
						Thyroid	chr15:50648885:50657781:clu_21465:ENSG00000092439.13	2.34478e-06	0.280993	0.0018295
	rs3131562	chr15_50480282_C_T_b38	0.8633	intronic	0.3986	Artery_Tibial	chr15:50482065:50489801:clu_18610:ENSG00000138592.13	1.99835e-07	-0.298342	1.30195e-50
						Breast_Mammary_Tissue	chr15:50482065:50489801:clu_20345:ENSG00000138592.13	1.83243e-08	-0.380713	4.9582e-22
						Cells_Cultured_fibroblasts	chr15:50482065:50489801:clu_16122:ENSG00000138592.13	5.54761e-10	-0.337384	2.5704e-52
						Colon_Transverse	chr15:50482065:50489801:clu_19704:ENSG00000138592.13	7.3487e-07	-0.331218	1.13926e-21
						Esophagus_Mucosa	chr15:50482065:50489801:clu_18739:ENSG00000138592.13	5.34009e-06	-0.263089	2.50702e-31
						Esophagus_Muscularis	chr15:50482065:50489801:clu_18618:ENSG00000138592.13	3.15749e-07	-0.328922	1.19053e-26
						Lung	chr15:50482065:50489801:clu_21280:ENSG00000138592.13	2.92631e-08	-0.234106	3.97221e-34
						Muscle_Skeletal	chr15:50482065:50489801:clu_17873:ENSG00000138592.13	2.08114e-12	-0.375407	2.75887e-53
						Muscle_Skeletal	chr15:50725323:50726321:clu_17888:ENSG00000138600.9	9.02378e-06	0.191402	4.35622e-08
						Nerve_Tibial	chr15:50482065:50489801:clu_20829:ENSG00000138592.13	3.41252e-08	-0.3242	7.64589e-52
						Nerve_Tibial	chr15:50648885:50657781:clu_20845:ENSG00000092439.13	4.17724e-06	0.309616	3.79371e-06
						Skin_Not_Sun_Exposed_Suprapubic	chr15:50482065:50489801:clu_20197:ENSG00000138592.13	6.08771e-08	-0.29495	2.90317e-34
						Skin_Sun_Exposed_Lower_leg	chr15:50482065:50489801:clu_20698:ENSG00000138592.13	3.32992e-09	-0.319157	8.43118e-49
						Stomach	chr15:50482065:50489801:clu_18169:ENSG00000138592.13	1.34828e-06	-0.334692	9.15676e-15
						Thyroid	chr15:50482065:50489801:clu_21447:ENSG00000138592.13	7.17166e-07	-0.25816	4.3381e-30
						Thyroid	chr15:50648885:50657781:clu_21465:ENSG00000092439.13	1.44007e-06	0.299377	0.0018295
	rs3131566	chr15_50466465_T_C_b38	0.8136	intronic;5upstream;3downstream;non-coding intronic	0.4702	Cells_Cultured_fibroblasts	chr15:50482065:50489801:clu_16122:ENSG00000138592.13	9.00329e-08	-0.282856	2.5704e-52
						Cells_EBV-transformed_lymphocytes	chr15:50482065:50489801:clu_14335:ENSG00000138592.13	7.37885e-07	-0.484921	1.01339e-14
						Muscle_Skeletal	chr15:50482065:50489801:clu_17873:ENSG00000138592.13	2.24939e-09	-0.30858	2.75887e-53
						Muscle_Skeletal	chr15:50648885:50657781:clu_17885:ENSG00000092439.13	5.86689e-08	0.283544	6.842e-07
						Nerve_Tibial	chr15:50482065:50489801:clu_20829:ENSG00000138592.13	1.36998e-06	-0.27294	7.64589e-52
						Nerve_Tibial	chr15:50648885:50657781:clu_20845:ENSG00000092439.13	1.57836e-07	0.337128	3.79371e-06
						Skin_Sun_Exposed_Lower_leg	chr15:50482065:50489801:clu_20698:ENSG00000138592.13	1.01056e-06	-0.259161	8.43118e-49
						Thyroid	chr15:50648885:50657781:clu_21465:ENSG00000092439.13	2.34478e-06	0.280993	0.0018295
	rs3131568	chr15_50465524_C_T_b38	0.8169	non-coding intronic;3downstream;intronic;5upstream	0.4692	Cells_Cultured_fibroblasts	chr15:50482065:50489801:clu_16122:ENSG00000138592.13	7.5058e-08	-0.284719	2.5704e-52
						Cells_EBV-transformed_lymphocytes	chr15:50482065:50489801:clu_14335:ENSG00000138592.13	1.47017e-06	-0.476722	1.01339e-14
						Muscle_Skeletal	chr15:50482065:50489801:clu_17873:ENSG00000138592.13	1.11142e-09	-0.314209	2.75887e-53
						Muscle_Skeletal	chr15:50648885:50657781:clu_17885:ENSG00000092439.13	4.45522e-08	0.285967	6.842e-07
						Nerve_Tibial	chr15:50482065:50489801:clu_20829:ENSG00000138592.13	8.26613e-07	-0.27816	7.64589e-52
						Nerve_Tibial	chr15:50648885:50657781:clu_20845:ENSG00000092439.13	1.90331e-07	0.334625	3.79371e-06
						Skin_Sun_Exposed_Lower_leg	chr15:50482065:50489801:clu_20698:ENSG00000138592.13	6.17839e-07	-0.264111	8.43118e-49
						Thyroid	chr15:50648885:50657781:clu_21465:ENSG00000092439.13	3.615e-06	0.275207	0.0018295
	rs3131574	chr15_50448742_C_A_b38	0.8202	non-coding intronic;intronic	0.4682	Cells_Cultured_fibroblasts	chr15:50482065:50489801:clu_16122:ENSG00000138592.13	1.43542e-06	-0.258189	2.5704e-52
						Muscle_Skeletal	chr15:50482065:50489801:clu_17873:ENSG00000138592.13	3.90147e-07	-0.262853	2.75887e-53
						Muscle_Skeletal	chr15:50648885:50657781:clu_17885:ENSG00000092439.13	9.43103e-08	0.279196	6.842e-07
						Nerve_Tibial	chr15:50648885:50657781:clu_20845:ENSG00000092439.13	3.3946e-08	0.355662	3.79371e-06
						Thyroid	chr15:50648885:50657781:clu_21465:ENSG00000092439.13	1.03736e-06	0.290866	0.0018295
	rs34639682	0	0.9639	non-coding;3downstream;5upstream;3utr	0.4284	0	0	0	0	0
	rs36042420	0	0.956	3utr;non-coding;5upstream;3downstream	0.4284	0	0	0	0	0
	rs4318151	chr15_50437077_A_G_b38	0.871	intronic;non-coding intronic;5upstream	0.3986	Artery_Tibial	chr15:50482065:50489801:clu_18610:ENSG00000138592.13	4.04321e-07	-0.289411	1.30195e-50
						Breast_Mammary_Tissue	chr15:50482065:50489801:clu_20345:ENSG00000138592.13	8.9079e-08	-0.358037	4.9582e-22
						Cells_Cultured_fibroblasts	chr15:50482065:50489801:clu_16122:ENSG00000138592.13	1.36674e-09	-0.328956	2.5704e-52
						Esophagus_Muscularis	chr15:50482065:50489801:clu_18618:ENSG00000138592.13	5.84981e-07	-0.321878	1.19053e-26
						Lung	chr15:50482065:50489801:clu_21280:ENSG00000138592.13	4.18394e-08	-0.230933	3.97221e-34
						Muscle_Skeletal	chr15:50482065:50489801:clu_17873:ENSG00000138592.13	7.75612e-12	-0.3652	2.75887e-53
						Nerve_Tibial	chr15:50482065:50489801:clu_20829:ENSG00000138592.13	3.35495e-07	-0.297602	7.64589e-52
						Skin_Not_Sun_Exposed_Suprapubic	chr15:50482065:50489801:clu_20197:ENSG00000138592.13	2.98616e-07	-0.277379	2.90317e-34
						Skin_Sun_Exposed_Lower_leg	chr15:50482065:50489801:clu_20698:ENSG00000138592.13	5.55145e-09	-0.312842	8.43118e-49
						Stomach	chr15:50482065:50489801:clu_18169:ENSG00000138592.13	1.172e-06	-0.334848	9.15676e-15
						Thyroid	chr15:50482065:50489801:clu_21447:ENSG00000138592.13	1.90156e-06	-0.246565	4.3381e-30
						Thyroid	chr15:50648885:50657781:clu_21465:ENSG00000092439.13	6.83813e-07	0.306104	0.0018295
	rs56398519	chr15_50481235_A_G_b38	0.9758	intronic	0.5746	Cells_Cultured_fibroblasts	chr15:50482065:50489801:clu_16122:ENSG00000138592.13	3.0042e-07	0.278159	2.5704e-52
						Muscle_Skeletal	chr15:50482065:50489801:clu_17873:ENSG00000138592.13	6.97851e-08	0.289797	2.75887e-53
						Muscle_Skeletal	chr15:50648885:50657781:clu_17885:ENSG00000092439.13	3.28799e-07	-0.277693	6.842e-07
						Nerve_Tibial	chr15:50648885:50657781:clu_20845:ENSG00000092439.13	7.12076e-06	-0.303891	3.79371e-06
	rs7174015	chr15_50424871_G_A_b38	1	non-coding intronic;intronic;5upstream	0.4215	Artery_Aorta	chr15:50482065:50489801:clu_17979:ENSG00000138592.13	4.7757e-06	-0.269685	2.39514e-18
						Artery_Tibial	chr15:50482065:50489801:clu_18610:ENSG00000138592.13	2.43922e-06	-0.268953	1.30195e-50
						Cells_Cultured_fibroblasts	chr15:50482065:50489801:clu_16122:ENSG00000138592.13	1.86449e-08	-0.301753	2.5704e-52
						Esophagus_Muscularis	chr15:50482065:50489801:clu_18618:ENSG00000138592.13	3.36231e-07	-0.325145	1.19053e-26
						Lung	chr15:50482065:50489801:clu_21280:ENSG00000138592.13	3.37107e-06	-0.195829	3.97221e-34
						Muscle_Skeletal	chr15:50482065:50489801:clu_17873:ENSG00000138592.13	2.10393e-10	-0.336486	2.75887e-53
						Muscle_Skeletal	chr15:50648885:50657781:clu_17885:ENSG00000092439.13	2.81751e-06	0.252399	6.842e-07
						Nerve_Tibial	chr15:50482065:50489801:clu_20829:ENSG00000138592.13	1.66995e-07	-0.304436	7.64589e-52
						Nerve_Tibial	chr15:50648885:50657781:clu_20845:ENSG00000092439.13	3.21778e-06	0.309695	3.79371e-06
						Skin_Not_Sun_Exposed_Suprapubic	chr15:50482065:50489801:clu_20197:ENSG00000138592.13	3.05329e-07	-0.279634	2.90317e-34
						Skin_Sun_Exposed_Lower_leg	chr15:50482065:50489801:clu_20698:ENSG00000138592.13	1.01175e-07	-0.285843	8.43118e-49
						Thyroid	chr15:50648885:50657781:clu_21465:ENSG00000092439.13	2.29358e-06	0.288034	0.0018295
	rs8026653	0	0.9758	intronic;non-coding intronic	0.5746	0	0	0	0	0

## Sheet: Table_S7
Table S7. Overlap of the rs10966811, rs12870438, and rs7867029 variants and its proxies with eQTL effects and epigenetic marks from GTEx, ENCODE and Roadmap Epigenomic projects.
General_information						localization_effect			GTEX data for eQTL and sQTL					Overlap_with_epigenetic_mark				Haploreg_result		functional_prediction_effect		other_annotation
Lead	refsnp_id	variant_id	R2	Predicted.Function	EUR.Frequency	Coding_effect	cpg_effect	mirna_effect	tissue	gene_id	pval_nominal	slope	pval_beta	Overlap with Testis Annotation (ENCODE)	encode_result	roadmap_result	regbuild_result	protein_bound	motifs_changed	RegulomeDB	Other_functional_prediction_effect	gad_effect	clinvar.Phenotypes	cosmic.Sample	gwas_Trait
rs10966811	rs10812205	0	0.9712	0	0.3986	polyphen_0_0:sift_0_0	0_0	mirbase_0_0:tarbase_0:mirna_0_0:targetscan__0	0	0	NA	NA	NA	ENCFF559LDF_CTCF_Testis_Adult54_ENCODE_GRCh38_.	encode_H3K9me3_bipolar neuron;encode_H3K9me3_HCT116;encode_H3K9me3_A673;encode_H3K9me3_H1 hESC ENCSR820QMS;encode_H3K9me3_HepG2	roadmap_H3K9me3_HUES6;roadmap_H3K9me3_common myeloid progenitor CD34 positive;roadmap_H3K9me3_Fetal Muscle Leg;roadmap_H3K9me3_iPS 20b;roadmap_H3K9me3_Fetal Intestine Large;roadmap_H3K9me3_Fetal Adrenal Gland;roadmap_H3K9me3_HUES64;roadmap_H3K9me3_heart right ventricle;roadmap_H3K9me3_B cells (PB) Roadmap	0		GATA	6	cadd_8.777:deepsea_0.15776:eigen_-0.058806:fathmm_0.21493_A:fitcons_0.061011:funseq2_0:gwava_0.02:remm_0.222	rs1360517;rs10514821;rs1185261;rs10514822;rs2274647;rs4405009_Acquired Immunodeficiency Syndrome;Respiratory Function Tests;Varicose Veins;Cholesterol, LDL;Body Mass Index;Body Height;Dehydroepiandrosterone_19754311;17903307;0;17903300;17903292	0	0	0
	rs10966798	0	0.9672	0	0.3996	polyphen_0_0:sift_0_0	0_0	mirbase_0_0:tarbase_0:mirna_0_0:targetscan__0	0	0	NA	NA	NA	0	0	0	0		Cdx, Foxl1, Foxp1, HNF1, Hoxa10, Hoxd10, Mef2, Pou2f2, TATA	6	cadd_4.695:deepsea_0.17979:eigen_0.030063:fathmm_0.16525_A:fitcons_0.053691:funseq2_0.571031:gwava_0.01:remm_0.256	rs10514822;rs4405009;rs2274647;rs1360517;rs10514821;rs1185261_Cholesterol, LDL;Dehydroepiandrosterone;Body Height;Acquired Immunodeficiency Syndrome;Body Mass Index;Varicose Veins;Respiratory Function Tests_0;17903292;19754311;17903300;17903307	0	0	0
	rs10966800	0	0.9631	0	0.3986	polyphen_0_0:sift_0_0	0_0	mirbase_0_0:tarbase_0:mirna_0_0:targetscan__0	0	0	NA	NA	NA	0	0	roadmap_H3K9me3_IMR 90	0		EWSR1-FLI1, Foxa, Foxd1, Foxk1, STAT	5	cadd_0.352:deepsea_0.3114:eigen_-0.215029:fathmm_0.10303_A:fitcons_0.053691:funseq2_0:gwava_0.02:remm_0.04	rs1360517;rs10514821;rs4405009;rs10514822;rs1185261;rs2274647_Acquired Immunodeficiency Syndrome;Body Mass Index;Dehydroepiandrosterone;Cholesterol, LDL;Respiratory Function Tests;Varicose Veins;Body Height_19754311;17903300;17903292;0;17903307	0	0	0
	rs10966811	0	1	0	0.3936	polyphen_0_0:sift_0_0	0_0	mirbase_0_0:tarbase_0:mirna_0_0:targetscan__0	0	0	NA	NA	NA	0	encode_H3K9me3_HepG2	0	0		YY1	7	cadd_0.073:deepsea_0.28057:eigen_-0.683857:fathmm_0.03359_A:fitcons_0.061011:funseq2_0:gwava_0.02:remm_0.032	rs10514822;rs1185261;rs10514821;rs1360517;rs4405009;rs2274647_Cholesterol, LDL;Varicose Veins;Respiratory Function Tests;Body Mass Index;Acquired Immunodeficiency Syndrome;Dehydroepiandrosterone;Body Height_0;17903307;17903300;19754311;17903292	0	0	Male fertility
	rs10966813	0	0.9513	0	0.4036	polyphen_0_0:sift_0_0	0_0	mirbase_0_0:tarbase_0:mirna_0_0:targetscan__0	0	0	NA	NA	NA	0	0	0	0		Bcl6b, DMRT2, Evi1, HDAC2, HNF1, PLZF, STAT, Sox	6	cadd_0.103:deepsea_0.57775:eigen_-0.428919:fathmm_0.07001_A:fitcons_0.061011:funseq2_0:gwava_0.02:remm_0.033	rs10514821;rs4405009;rs1185261;rs2274647;rs10514822;rs1360517_Respiratory Function Tests;Dehydroepiandrosterone;Varicose Veins;Body Height;Cholesterol, LDL;Acquired Immunodeficiency Syndrome;Body Mass Index_17903307;17903292;0;19754311;17903300	0	0	0
	rs10966816	0	0.811	0	0.4423	polyphen_0_0:sift_0_0	0_0	mirbase_0_0:tarbase_0:mirna_0_0:targetscan__0	0	0	NA	NA	NA	0	encode_H3K9me3_HepG2;encode_H3K9me3_bipolar neuron	0	0		HNF4, Irf, Maf, Nrf2, Pax4	7	cadd_0.316:deepsea_0.37115:eigen_-0.61797:fathmm_0.05748_A:fitcons_0.061011:funseq2_0:gwava_0:remm_0.036	rs10514821;rs2274647;rs1185261;rs10514822;rs1360517;rs4405009_Respiratory Function Tests;Body Height;Varicose Veins;Cholesterol, LDL;Body Mass Index;Acquired Immunodeficiency Syndrome;Dehydroepiandrosterone_17903307;0;17903300;19754311;17903292	0	0	0
	rs11789162	0	0.8906	0	0.4195	polyphen_0_0:sift_0_0	0_0	mirbase_0_0:tarbase_0:mirna_0_0:targetscan__0	0	0	NA	NA	NA	0	encode_H3K9me3_HepG2	roadmap_H2BK120ac_H9;roadmap_H3K9me3_H1-mesenchymal;roadmap_H3K9me3_common myeloid progenitor CD34 positive;roadmap_H3K9me3_HUES64	0		DMRT1, DMRT7, Foxa, TEF1	7	cadd_2.596:deepsea_0.051036:eigen_-0.215961:fathmm_0.07757_AB:fitcons_0.061011:funseq2_0:gwava_0.06:remm_0.551	rs1185261;rs10514821;rs2274647;rs4405009;rs1360517;rs10514822_Varicose Veins;Respiratory Function Tests;Body Mass Index;Body Height;Dehydroepiandrosterone;Acquired Immunodeficiency Syndrome;Cholesterol, LDL_0;17903307;17903300;17903292;19754311	0	0	0
	rs12376540	0	0.9473	0	0.4046	polyphen_0_0:sift_0_0	0_0	mirbase_0_0:tarbase_0:mirna_0_0:targetscan__0	0	0	NA	NA	NA	0	0	roadmap_H3K4me3_CD4 positive CD25 positive alpha beta regulatory T cell	0		Pbx1	6	cadd_1.84;1.66:deepsea_0.34302;0.32469:eigen_-0.164191:fathmm_0.08971;0.08421_A:fitcons_0.061011:funseq2_0:gwava_0.01:remm_0.238	rs2274647;rs10514821;rs1360517;rs4405009;rs1185261;rs10514822_Body Height;Respiratory Function Tests;Acquired Immunodeficiency Syndrome;Body Mass Index;Dehydroepiandrosterone;Varicose Veins;Cholesterol, LDL_0;17903307;19754311;17903300;17903292	0	0	0
	rs13300527	0	0.9712	0	0.3986	polyphen_0_0:sift_0_0	0_0	mirbase_0_0:tarbase_0:mirna_0_0:targetscan__0	0	0	NA	NA	NA	0	0	roadmap_H3K4me1_lung ENCSR465WKM;roadmap_H3K9me3_iPS 20b	0		Duxl, GAATA, RXRA	5	cadd_0.46:deepsea_0.34388:eigen_-0.250694:fathmm_0.07633_AB:fitcons_0.053691:funseq2_0:gwava_0.01:remm_0.037	rs1185261;rs2274647;rs10514822;rs10514821;rs1360517;rs4405009_Varicose Veins;Body Height;Cholesterol, LDL;Body Mass Index;Acquired Immunodeficiency Syndrome;Dehydroepiandrosterone;Respiratory Function Tests_0;17903300;19754311;17903292;17903307	0	0	0
	rs1332434	0	0.9752	0	0.3956	polyphen_0_0:sift_0_0	0_0	mirbase_0_0:tarbase_0:mirna_0_0:targetscan__0	0	0	NA	NA	NA	0	0	roadmap_H3K4me3_CD4 positive CD25 positive alpha beta regulatory T cell	0		OTX	5	cadd_2.245:deepsea_0.087239:eigen_0.043876:fathmm_0.12754_A:fitcons_0.053691:funseq2_0:gwava_0.04:remm_0.395	rs10514822;rs4405009;rs1185261;rs10514821;rs2274647;rs1360517_Cholesterol, LDL;Dehydroepiandrosterone;Varicose Veins;Respiratory Function Tests;Body Height;Body Mass Index;Acquired Immunodeficiency Syndrome_0;17903292;17903307;17903300;19754311	0	0	0
	rs145441806	0	0.9473	0	0.4046	polyphen_0_0:sift_0_0	0_0	mirbase_0_0:tarbase_0:mirna_0_0:targetscan__0	0	0	NA	NA	NA	0	0	0	0			7	cadd_0:deepsea_0:eigen_0:fathmm_0_0:fitcons_0.061011:funseq2_0:gwava_0:remm_0.652	rs10514821;rs1360517;rs4405009;rs2274647;rs1185261;rs10514822_Respiratory Function Tests;Body Mass Index;Acquired Immunodeficiency Syndrome;Dehydroepiandrosterone;Body Height;Varicose Veins;Cholesterol, LDL_17903307;17903300;19754311;17903292;0	0	0	0
	rs62534083	0	0.9432	0	0.4036	polyphen_0_0:sift_0_0	0_0	mirbase_0_0:tarbase_0:mirna_0_0:targetscan__0	0	0	NA	NA	NA	0	0	0	0			7	cadd_14.32:deepsea_0.030235:eigen_0.844829:fathmm_0.77982_A:fitcons_0.061011:funseq2_0:gwava_0.08:remm_0.652	rs2274647;rs10514822;rs1185261;rs10514821;rs4405009;rs1360517_Body Height;Cholesterol, LDL;Varicose Veins;Body Mass Index;Dehydroepiandrosterone;Acquired Immunodeficiency Syndrome;Respiratory Function Tests_0;17903300;17903292;19754311;17903307	0	0	0
	rs7871803	0	0.8168	0	0.4384	polyphen_0_0:sift_0_0	0_0	mirbase_0_0:tarbase_0:mirna_0_0:targetscan__0	0	0	NA	NA	NA	0	0	0	0		HES1, Mef2	7	cadd_0.013:deepsea_0.23046:eigen_-0.59446:fathmm_0.06688_A:fitcons_0.053691:funseq2_0:gwava_0.06:remm_0.031	rs10514821;rs4405009;rs10514822;rs2274647;rs1185261;rs1360517_Respiratory Function Tests;Dehydroepiandrosterone;Body Mass Index;Cholesterol, LDL;Body Height;Varicose Veins;Acquired Immunodeficiency Syndrome_17903307;17903292;17903300;0;19754311	0	0	0
rs12870438	rs11431398	0	0.9114	non-coding intronic;intronic	0	polyphen_0_0:sift_0_0	0_0	mirbase_0_0:tarbase_0:mirna_0_0:targetscan__0	0	0	NA	NA	NA	0	encode_H3K36me3_CD14 positive monocyte;encode_H3K36me3_Monocytes-CD14+;encode_H3K27me3_A549;encode_H3K27me3_A549 ENCSR797CXN	roadmap_H3K9me3_endodermal cell;roadmap_H3K36me3_Fetal Muscle Leg;roadmap_H3K36me3_endodermal cell;roadmap_H3K36me3_common myeloid progenitor CD34 positive ENCSR337XXD 1;roadmap_H3K36me3_common myeloid progenitor CD34 positive;roadmap_H3K36me3_Natural Killer cells (PB);roadmap_H3K36me3_Fetal Intestine Large;roadmap_H3K36me3_T cells (PB) Roadmap	0			6	cadd_0:deepsea_0:eigen_0:fathmm_0_0:fitcons_0.106106:funseq2_0:gwava_0:remm_0.52	0_0_0	0	0	0
	rs12870438	0	1	non-coding intronic;intronic	0.3926	polyphen_0_0:sift_0_0	0_0	mirbase_0_0:tarbase_0:mirna_0_0:targetscan__0	0	0	NA	NA	NA	0	encode_H3K36me3_CD14 positive monocyte;encode_H3K36me3_Monocytes-CD14+;encode_H3K36me3_GM12878;encode_H3K36me3_GM12878 ENCSR447YYN;encode_H3K36me3_DND-41;encode_H3K27me3_K562;encode_H3K4me1_MCF 7	roadmap_H3K36me3_common myeloid progenitor CD34 positive;roadmap_H3K36me3_endodermal cell;roadmap_H3K36me3_common myeloid progenitor CD34 positive ENCSR337XXD 1;roadmap_H3K36me3_CD4 positive alpha beta T cell ENCSR948ZKZ;roadmap_H3K36me3_T cells (PB) Roadmap;roadmap_H3K36me3_Fetal Intestine Large;roadmap_H3K36me3_Fetal Muscle Leg;roadmap_H3K36me3_Spleen;roadmap_H3K36me3_sigmoid colon;roadmap_H3K3…	0		SEF1	4	cadd_2.423:deepsea_0.035054:eigen_-0.056621:fathmm_0.15532_AB:fitcons_0.062308:funseq2_0.011479:gwava_0.13:remm_0.078	0_0_0	0	0	0
	rs12870885	0	0.8102	0	0.3668	polyphen_0_0:sift_0_0	0_0	mirbase_0_0:tarbase_0:mirna_0_0:targetscan__0	0	0	NA	NA	NA	0	encode_H3K4me1_bipolar neuron;encode_H3K4me1_endothelial cell of umbilical vein;encode_H3K4me1_HUVEC;encode_H3K4me1_fibroblast of dermis;encode_ZZZ3_GM12878 ENCSR447YYN;encode_H3K4me1_Monocytes-CD14+;encode_H3K4me1_CD14 positive monocyte;encode_H3K4me1_keratinocyte;encode_H3K4me1_NHEK;encode_H3K4me1_NHDF-AD;encode_H3K4me1_MCF 7;encode_H3K27me3_HCT116	roadmap_H3K4me1_common myeloid progenitor CD34 positive ENCSR337XXD 1;roadmap_H3K14ac_H1-trophoblast;roadmap_H3K4me1_common myeloid progenitor CD34 positive;roadmap_H3K4me1_iPS 20b;roadmap_H3K4me1_common myeloid progenitor CD34 positive ENCSR722JRY;roadmap_H3K23me2_H1 hESC	regbuild_Promoter Flanking Region_INACTIVE_A549;regbuild_Promoter Flanking Region_INACTIVE_A549 ENCSR797CXN;regbuild_Promoter Flanking Region_INACTIVE_A673;regbuild_Promoter Flanking Region_INACTIVE_Aorta;regbuild_Promoter Flanking Region_INACTIVE_astrocyte;regbuild_Promoter Flanking Region_INACTIVE_B cell ENCSR682AXR;regbuild_Promoter Flanking Region_INACTIVE_B cells (PB) Roadmap;regbuild_Promot…	ZZZ3		4	cadd_2.004:deepsea_0.20756:eigen_-0.18402:fathmm_0.02896_ABC:fitcons_0.074388:funseq2_0.155386:gwava_0.1:remm_0.065	0_0_0	0	0	0
	rs1535897	0	0.9875	intronic;non-coding intronic	0.3936	polyphen_0_0:sift_0_0	0_0	mirbase_0_0:tarbase_0:mirna_0_0:targetscan__0	0	0	NA	NA	NA	0	encode_H3K36me3_CD14 positive monocyte;encode_H3K36me3_Monocytes-CD14+;encode_H3K36me3_GM12878;encode_H3K4me1_bipolar neuron	roadmap_H3K36me3_common myeloid progenitor CD34 positive;roadmap_H3K36me3_Natural Killer cells (PB);roadmap_H3K36me3_endodermal cell;roadmap_H3K36me3_common myeloid progenitor CD34 positive ENCSR337XXD 1;roadmap_H3K36me3_CD4 positive alpha beta T cell ENCSR948ZKZ;roadmap_H3K36me3_B cells (PB) Roadmap;roadmap_H3K36me3_T cells (PB) Roadmap;roadmap_H3K36me3_Fetal Intestine Small;roadmap_H3K36me3_Fet…	0		AP1, E2F, STAT	5	cadd_2.322;3.183:deepsea_0.049245;0.032204:eigen_0.127086:fathmm_0.17854;0.15422_ADB:fitcons_0.106106:funseq2_0.166865:gwava_0.05:remm_0.518	0_0_0	0	0	0
	rs1535898	0	0.9875	non-coding intronic;intronic	0.3936	polyphen_0_0:sift_0_0	0_0	mirbase_0_0:tarbase_0:mirna_0_0:targetscan__0	0	0	NA	NA	NA	0	encode_H3K36me3_CD14 positive monocyte;encode_H3K36me3_Monocytes-CD14+;encode_H3K36me3_GM12878;encode_H3K4me1_bipolar neuron	roadmap_H3K36me3_common myeloid progenitor CD34 positive;roadmap_H3K36me3_Natural Killer cells (PB);roadmap_H3K36me3_endodermal cell;roadmap_H3K36me3_common myeloid progenitor CD34 positive ENCSR337XXD 1;roadmap_H3K36me3_CD4 positive alpha beta T cell ENCSR948ZKZ;roadmap_H3K36me3_B cells (PB) Roadmap;roadmap_H3K36me3_T cells (PB) Roadmap;roadmap_H3K36me3_Fetal Intestine Small;roadmap_H3K36me3_Fet…	0		Hoxa5, RXRA	5	cadd_14.72:deepsea_0.027322:eigen_0.982871:fathmm_0.67038_AB:fitcons_0.062308:funseq2_0.634313:gwava_0.18:remm_0.941	0_0_0	0	0	0
	rs1535900	0	0.9753	non-coding intronic;intronic	0.6034	polyphen_0_0:sift_0_0	0_0	mirbase_0_0:tarbase_0:mirna_0_0:targetscan__0	0	0	NA	NA	NA	0	encode_H3K36me3_CD14 positive monocyte;encode_H3K36me3_Monocytes-CD14+;encode_H3K36me3_GM12878;encode_H3K4me1_MCF 7;encode_H3K36me3_GM12878 ENCSR447YYN	roadmap_H3K36me3_common myeloid progenitor CD34 positive;roadmap_H3K36me3_endodermal cell;roadmap_H3K36me3_common myeloid progenitor CD34 positive ENCSR337XXD 1;roadmap_H3K36me3_CD4 positive alpha beta T cell ENCSR948ZKZ;roadmap_H3K36me3_B cells (PB) Roadmap;roadmap_H3K36me3_T cells (PB) Roadmap;roadmap_H3K36me3_Fetal Intestine Large;roadmap_H3K36me3_Fetal Muscle Leg;roadmap_H3K36me3_Spleen;roadm…	0		EWSR1-FLI1, Foxi1, Pou2f2	6	cadd_3.575:deepsea_0.13695:eigen_0.035426:fathmm_0.05512_AB:fitcons_0.164513:funseq2_0.011479:gwava_0.04:remm_0.052	0_0_0	0	0	0
	rs1830780	0	0.9875	non-coding intronic;intronic	0.3936	polyphen_0_0:sift_0_0	0_0	mirbase_0_0:tarbase_0:mirna_0_0:targetscan__0	0	0	NA	NA	NA	0	encode_H3K36me3_CD14 positive monocyte;encode_H3K36me3_Monocytes-CD14+;encode_H3K27me3_bipolar neuron;encode_H3K36me3_GM12878	roadmap_H3K36me3_endodermal cell;roadmap_H3K36me3_common myeloid progenitor CD34 positive ENCSR337XXD 1;roadmap_H3K36me3_common myeloid progenitor CD34 positive;roadmap_H3K36me3_Fetal Intestine Small;roadmap_H3K36me3_Fetal Intestine Large;roadmap_H3K27me3_neural stem progenitor cell	0		Crx, Nr2f2	6	cadd_0.054:deepsea_0.3964:eigen_-0.777478:fathmm_0.0378_A:fitcons_0.099367:funseq2_0.011479:gwava_0.01:remm_0.015	0_0_0	0	0	0
	rs34525682	0	0.9633	intronic;non-coding intronic	0.4016	polyphen_0_0:sift_0_0	0_0	mirbase_0_0:tarbase_0:mirna_0_0:targetscan__0	0	0	NA	NA	NA	0	encode_H3K36me3_CD14 positive monocyte;encode_H3K36me3_Monocytes-CD14+	roadmap_H3K36me3_Natural Killer cells (PB);roadmap_H3K36me3_T cells (PB) Roadmap;roadmap_H3K36me3_endodermal cell;roadmap_H3K36me3_common myeloid progenitor CD34 positive	0			7	cadd_1.442:deepsea_0.24516:eigen_-0.477165:fathmm_0.0549_A:fitcons_0.106106:funseq2_0.011479:gwava_0:remm_0.019	0_0_0	0	0	0
	rs58357177	0	0.9958	non-coding intronic;intronic	0.3936	polyphen_0_0:sift_0_0	0_0	mirbase_0_0:tarbase_0:mirna_0_0:targetscan__0	0	0	NA	NA	NA	ENCFF819NRA_H3K27ac_Testis_Adult37_ENCODE_GRCh38_Peak_83801	encode_H3K36me3_CD14 positive monocyte;encode_H3K36me3_Monocytes-CD14+;encode_H3K36me3_GM12878;encode_H3K36me3_GM12878 ENCSR447YYN;encode_H3K36me3_DND-41;encode_H3K27me3_K562;encode_H3K4me1_MCF 7	roadmap_H3K36me3_common myeloid progenitor CD34 positive;roadmap_H3K36me3_endodermal cell;roadmap_H3K36me3_common myeloid progenitor CD34 positive ENCSR337XXD 1;roadmap_H3K36me3_CD4 positive alpha beta T cell ENCSR948ZKZ;roadmap_H3K36me3_T cells (PB) Roadmap;roadmap_H3K36me3_Fetal Intestine Large;roadmap_H3K36me3_Fetal Muscle Leg;roadmap_H3K36me3_Spleen;roadmap_H3K36me3_sigmoid colon;roadmap_H3K3…	0		E2A, Myf, SEF1, ZEB1		cadd_0:deepsea_0.034408:eigen_0:fathmm_0_0:fitcons_0.164513:funseq2_0:gwava_0:remm_0.194	0_0_0	0	0	0
	rs63351261	0	0.9834	non-coding intronic;intronic	0.3946	polyphen_0_0:sift_0_0	0_0	mirbase_0_0:tarbase_0:mirna_0_0:targetscan__0	0	0	NA	NA	NA	0	encode_H3K36me3_CD14 positive monocyte;encode_H3K36me3_Monocytes-CD14+	roadmap_H3K36me3_endodermal cell;roadmap_H3K36me3_common myeloid progenitor CD34 positive ENCSR337XXD 1;roadmap_H3K36me3_common myeloid progenitor CD34 positive;roadmap_H3K36me3_Natural Killer cells (PB)	0		ATF3, Evi1, HEY1, HP1-site-factor, Irx, Pou2f2, TATA	6	cadd_0:deepsea_0.0984:eigen_0:fathmm_0_0:fitcons_0.088506:funseq2_0:gwava_0:remm_0.418	0_0_0	0	0	0
	rs71099806	0	0.883	non-coding intronic;intronic	0.3956	polyphen_0_0:sift_0_0	0_0	mirbase_0_0:tarbase_0:mirna_0_0:targetscan__0	0	0	NA	NA	NA	0	encode_H3K27me3_A549 ENCSR797CXN;encode_H3K27me3_A549	roadmap_H3K36me3_common myeloid progenitor CD34 positive;roadmap_H3K36me3_endodermal cell;roadmap_H3K36me3_Natural Killer cells (PB)	0		Evi1, HDAC2, Hoxa10, SRF, STAT, TATA, p300		cadd_0:deepsea_0.29545:eigen_0:fathmm_0_0:fitcons_0.106106:funseq2_0:gwava_0:remm_0.019	0_0_0	0	0	0
	rs9590722	0	0.8063	0	0.3678	polyphen_0_0:sift_0_0	0_0	mirbase_0_0:tarbase_0:mirna_0_0:targetscan__0	0	0	NA	NA	NA	ENCFF316MJM_H3K4me1_Testis_Adult37_ENCODE_GRCh38_Peak_47508	encode_H3K4me1_bipolar neuron;encode_H3K4me1_endothelial cell of umbilical vein;encode_H3K4me1_HUVEC;encode_H3K4me1_fibroblast of dermis;encode_H3K4me1_Monocytes-CD14+;encode_H3K4me1_CD14 positive monocyte;encode_H3K4me1_keratinocyte;encode_H3K4me1_NHEK;encode_H3K4me1_NHDF-AD;encode_H3K4me1_HeLa-S3;encode_H3K4me1_Osteobl;encode_H3K4me1_mammary epithelial cell;encode_H3K4me1_HMEC;encode_H3K4me1_HS…	roadmap_H2BK12ac_H1-trophoblast;roadmap_H3K4me1_iPS DF 19.11;roadmap_H3K4me1_Fetal Intestine Large;roadmap_H3K4me1_IMR90;roadmap_H2AK5ac_H1-trophoblast;roadmap_DNase1_heart;roadmap_H3K4me1_common myeloid progenitor CD34 positive ENCSR337XXD 1;roadmap_H3K4me1_common myeloid progenitor CD34 positive;roadmap_H3K4me1_common myeloid progenitor CD34 positive ENCSR722JRY;roadmap_H3K4me1_HUES6;roadmap_H4…	regbuild_Promoter Flanking Region_INACTIVE_GM12878 ENCSR447YYN;regbuild_Promoter Flanking Region_INACTIVE_H1 hESC;regbuild_Promoter Flanking Region_INACTIVE_H1 hESC ENCSR820QMS;regbuild_Promoter Flanking Region_INACTIVE_H1-mesenchymal;regbuild_Promoter Flanking Region_INACTIVE_H1-neuronal progenitor;regbuild_Promoter Flanking Region_INACTIVE_H1-trophoblast;regbuild_Promoter Flanking Region_INACTI…			4	cadd_4.157:deepsea_0.10992:eigen_0.127844:fathmm_0.11759_ALL:fitcons_0.119485:funseq2_0.155386:gwava_0.16:remm_0.718	0_0_0	0	0	0
	rs9594826	0	0.8063	0	0.3678	polyphen_0_0:sift_0_0	0_0	mirbase_0_0:tarbase_0:mirna_0_0:targetscan__0	0	0	NA	NA	NA	ENCFF316MJM_H3K4me1_Testis_Adult37_ENCODE_GRCh38_Peak_18432	encode_H3K27me3_NH-A;encode_H3K4me1_bipolar neuron;encode_H3K27me3_astrocyte;encode_H3K27me3_bipolar neuron	roadmap_H3K27me3_IMR 90;roadmap_H3K4me1_Fetal Muscle Leg;roadmap_H3K27me3_Fetal Intestine Large;roadmap_H3K4me1_H1-trophoblast;roadmap_H3K79me1_H1-trophoblast;roadmap_H2BK12ac_H1-trophoblast;roadmap_H4K8ac_H1-trophoblast;roadmap_H2AK5ac_H1-trophoblast;roadmap_H3K4me1_endodermal cell;roadmap_H4K91ac_H1-trophoblast;roadmap_H3K4me1_lung ENCSR465WKM	0		SIX5	5	cadd_2.896;3.007;3.284:deepsea_0.1227;0.090951;0.17377:eigen_-0.075663:fathmm_0.1242;0.13183;0.1364_AB:fitcons_0.053691:funseq2_0:gwava_0.05:remm_0.048	0_0_0	0	0	0
	rs9594827	0	0.8063	0	0.3678	polyphen_0_0:sift_0_0	0_0	mirbase_0_0:tarbase_0:mirna_0_0:targetscan__0	0	0	NA	NA	NA	ENCFF316MJM_H3K4me1_Testis_Adult37_ENCODE_GRCh38_Peak_18432	encode_H3K27me3_NH-A;encode_H3K4me1_bipolar neuron;encode_H3K27me3_astrocyte;encode_H3K27me3_bipolar neuron	roadmap_H3K27me3_IMR 90;roadmap_H3K4me1_Fetal Muscle Leg;roadmap_H3K27me3_Fetal Intestine Large;roadmap_H3K79me1_H1-trophoblast;roadmap_H3K4me1_endodermal cell;roadmap_H3K4me1_lung ENCSR465WKM;roadmap_H3K27ac_Aorta;roadmap_H3K4me1_HUES64;roadmap_H3K14ac_H1-trophoblast;roadmap_H2AK5ac_H1-trophoblast	0		Barx1, Bsx, Dlx5, Hoxb4, Nkx2, Nobox, Prrx1, SP1	6	cadd_7.045:deepsea_0.092822:eigen_0.047557:fathmm_0.14829_AB:fitcons_0.053691:funseq2_0:gwava_0.06:remm_0.736	0_0_0	0	0	0
	rs9594829	0	0.9711	intronic;non-coding intronic	0.3936	polyphen_0_0:sift_0_0	0_0	mirbase_0_0:tarbase_0:mirna_0_0:targetscan__0	0	0	NA	NA	NA	0	encode_H3K36me3_CD14 positive monocyte;encode_H3K36me3_Monocytes-CD14+;encode_H3K27me3_A673	roadmap_H3K36me3_common myeloid progenitor CD34 positive;roadmap_H3K36me3_endodermal cell;roadmap_H3K36me3_T cells (PB) Roadmap;roadmap_H3K36me3_CD4 positive alpha beta T cell ENCSR948ZKZ;roadmap_H3K36me3_Natural Killer cells (PB);roadmap_H3K36me3_B cells (PB) Roadmap;roadmap_H3K36me3_common myeloid progenitor CD34 positive ENCSR337XXD 1;roadmap_H3K36me3_Fetal Intestine Large;roadmap_H3K36me3_lun…	0		RXRA	7	cadd_10.78:deepsea_0.021424:eigen_0.450494:fathmm_0.22564_AB:fitcons_0.106106:funseq2_0.011479:gwava_0.1:remm_0.634	0_0_0	0	0	0
rs7867029	rs7867029	0	1	0	0.1282	polyphen_0_0:sift_0_0	0_0	mirbase_0_0:tarbase_0:mirna_0_0:targetscan__0	0	0	NA	NA	NA	0	encode_H3K27me3_PC 9;encode_H3K4me1_Monocytes-CD14+;encode_H3K4me1_CD14 positive monocyte;encode_H3K4me1_H9 ENCSR323FKB;encode_H3K4me1_Osteobl	roadmap_H3K27me3_Fetal Adrenal Gland;roadmap_H3K36me3_Right Atrium;roadmap_H3K4me1_H1 hESC;roadmap_H3K4me1_HUES6;roadmap_H3K4me1_iPS 20b;roadmap_H3K4me1_HUES64	0		CEBPA_1, DMRT4, E2F_disc6, NF-E2_disc2, Pou3f2_1, TFE, p300_disc2	4	cadd_2.035:deepsea_0.061662:eigen_-0.190303:fathmm_0.05038_AB:fitcons_0.074388:funseq2_0.002295:gwava_0.11:remm_0.013	0_0_0	0	0	0

## Sheet: Table_S8
Table S8. In silico transcription factor binding motif alterations concordantly predicted by HaploReg for SNP proxies of rs7174015, rs10966811, and rs12870438. All prioritized SNPs from genetic analysis were investigated and only those predicted to alter a transcription factor binding motifs are displayed.
Lead SNP	Locus	Chage	MAF	Proxies	Chage	MAF	Haplotypes with lead SNP	TF predicted to be disrupted	PWM	Ref allele	Score	Alt allele	Score	Effect of the risk allele on binding affinity
rs7174015	USP8	A<G	0.421	rs12593481	C<T	0.4692	A=C, G=T	PAX5	Pax-5_known3	T	7.7	C	-2.4	Strongly decrease
								YY1	YY1_known4		-4.2		7.8	Strongly increase
				rs2289108	A<G	0.5746	A=G, G=A	YY1	YY1_known2	G	12.6	A	10.3	Increase
				rs28582911	A<G	0.4264	A=A, G=G	SIX5	SIX5_known2	G	7.4	A	13.1	Strongly increase
				rs3098171	G<C	0.4254	A=G, G=C	HSF1	Hsf_known3	C	11.3	G	1.1	Strongly decrease
				rs3098174	T<C	0.3986	A=T, G=C	FOXJ1	Foxj1_1	C	5.7	T	7.3	Increase
				rs3098205	T<G	0.4682	A=T, G=G	PLZF	PLZF	G	18.6	T	17.1	Decrease
				rs3131574	A<C	0.4682	A=A, G=C	NR6A1	GCNF	C	8	A	8.8	Decrease
				rs56398519	G<A	0.5746	A=A, G=G	FOXJ1	Foxj1_2	A	12.2	G	11.8	Increase
rs10966811	TUSC1	A<G	0.394	rs10966798	C<T	0.3996	A=C, G=T	HOXA10	Hoxa10	T	13.4	C	10.9	Increase*
				rs10966811	A<G	0.3936	A=A, G=G	YY1	YY1_known2	G	0.1	A	12	Strongly decrease*
								YY1	YY1_known6		1.7		13.5	Strongly decrease*
				rs10966813	C<G	0.4036	A=C, G=G	DMRT2	DMRT2	G	6.8	C	4.4	Increase*
								BCL6	Bcl6b		5.9		11.1	Strongly decrease*
								PLZF	PLZF		13.8		12.9	Increase*
				rs11789162	C<T	0.4195	A=C, G=T	DMRT1	DMRT1	T	6.4	C	-5.5	Strongly increase*
								DMRT7	DMRT7		11.9		9.9	Increase*
rs12870438	EPSTI1	A<G	0.393	rs71099806	-<A	0.3956	A=-, G=A	HOXA10	Hoxa10	TA	12.3	T	7.3	Strongly increase
				rs9594826	C<T	0.3678	A=C, G=T	SIX5	SIX5_known2	T	12.8	C	7.1	Strongly decrease
MAF, minor allele frequencies of the EUR popualtion of the 1000 genomes phase III project; TF, transcription factor, Transcription factor position weight matrix (PWM) ID from the HaploReg library.
*Risk allele for unsuccessful testicular sperm extraction (TESE).

## Sheet: Table_S9
Table S9. Enrichment of gene ontology (GO) biological processes for the set of transcription factors with changed motifs overlapping with the associated variants.
GO term ID	term description	observed gene count	background gene count	false discovery rate	matching proteins in your network (IDs)	matching proteins in your network (labels)
GO:0006357	regulation of transcription by RNA polymerase II	88	2633	7.78e-61	ENSP00000162391,ENSP00000221996,ENSP00000222584,ENSP00000222726,ENSP00000231509,ENSP00000231656,ENSP00000232424,ENSP00000233638,ENSP00000239461,ENSP00000242462,ENSP00000244745,ENSP00000249501,ENSP00000253968,ENSP00000257555,ENSP00000259915,ENSP00000262238,ENSP00000262965,ENSP00000263253,ENSP00000263334,ENSP00000265354,ENSP00000266304,ENSP00000283921,ENSP00000284000,ENSP00000290295,ENSP00000290552…	ATF3,BARX1,BCL6,BCL6B,BPTF,BSX,CDC5L,CDX1,CEBPA,CEBPB,CEBPD,CEBPG,CRX,DBX1,DBX2,DMRT1,DMRT2,DMRTA2,ENSG00000173575,EP300,FOXD1,FOXI1,FOXJ1,FOXJ2,FOXK1,FOXL1,FOXP1,GABPA,GFI1,GFI1B,HDAC2,HES1,HEY1,HNF1A,HNF4A,HOXA10,HOXA5,HOXA9,HOXB13,HOXB4,HOXB9,HOXD10,IL6,IRX6,JUN,LHX3,MAF,MEF2A,MYC,NEUROG3,NKX6-1,NOBOX,NR2F2,NR3C1,NR6A1,PAX4,PAX5,PAX6,PAX8,PBX1,PITX2,POU1F1,POU2F2,POU3F2,POU3F4,POU5F1,POU6F1,PR…
GO:0006355	regulation of transcription, DNA-templated	91	3661	7.07e-54	ENSP00000162391,ENSP00000221996,ENSP00000222584,ENSP00000222726,ENSP00000231509,ENSP00000231656,ENSP00000232424,ENSP00000233638,ENSP00000239461,ENSP00000242462,ENSP00000244745,ENSP00000249501,ENSP00000253968,ENSP00000257555,ENSP00000259915,ENSP00000262238,ENSP00000262965,ENSP00000263253,ENSP00000263334,ENSP00000265354,ENSP00000265990,ENSP00000266304,ENSP00000283921,ENSP00000284000,ENSP00000290295…	ATF3,BARX1,BCL6,BCL6B,BPTF,BSX,BTAF1,CDC5L,CDX1,CEBPA,CEBPB,CEBPD,CEBPG,CRX,DBX1,DBX2,DMRT1,DMRT2,DMRTA2,ENSG00000173575,EP300,FOXD1,FOXI1,FOXJ1,FOXJ2,FOXK1,FOXL1,FOXP1,GABPA,GFI1,GFI1B,HDAC2,HES1,HEY1,HNF1A,HNF4A,HOXA10,HOXA5,HOXA9,HOXB13,HOXB4,HOXB9,HOXD10,IL6,IRX6,JUN,LHX3,MAF,MEF2A,MYC,NEUROG3,NKX6-1,NOBOX,NR2F2,NR3C1,NR6A1,PAX4,PAX5,PAX6,PAX8,PBX1,PITX2,POU1F1,POU2F2,POU3F2,POU3F4,POU5F1,POU…
GO:2000112	regulation of cellular macromolecule biosynthetic process	93	4050	7.99e-54	ENSP00000162391,ENSP00000221996,ENSP00000222584,ENSP00000222726,ENSP00000231509,ENSP00000231656,ENSP00000232424,ENSP00000233638,ENSP00000239461,ENSP00000242462,ENSP00000244745,ENSP00000246657,ENSP00000249501,ENSP00000253968,ENSP00000257555,ENSP00000259915,ENSP00000262238,ENSP00000262965,ENSP00000263253,ENSP00000263334,ENSP00000265354,ENSP00000265990,ENSP00000266304,ENSP00000283921,ENSP00000284000…	ATF3,BARX1,BCL6,BCL6B,BPTF,BSX,BTAF1,CCR7,CDC5L,CDX1,CEBPA,CEBPB,CEBPD,CEBPG,CRX,DBX1,DBX2,DMRT1,DMRT2,DMRTA2,ENSG00000173575,EP300,FOXD1,FOXI1,FOXJ1,FOXJ2,FOXK1,FOXL1,FOXP1,GABPA,GFI1,GFI1B,HDAC2,HES1,HEY1,HNF1A,HNF4A,HOXA10,HOXA5,HOXA9,HOXB13,HOXB4,HOXB9,HOXD10,IL6,IRX6,JUN,LHX3,MAF,MEF2A,MYC,NEUROG3,NKX6-1,NOBOX,NR2F2,NR3C1,NR6A1,PAX4,PAX5,PAX6,PAX8,PBX1,PITX2,POU1F1,POU2F2,POU3F2,POU3F4,POU5F…
GO:0051252	regulation of RNA metabolic process	91	3890	4.27e-52	ENSP00000162391,ENSP00000221996,ENSP00000222584,ENSP00000222726,ENSP00000231509,ENSP00000231656,ENSP00000232424,ENSP00000233638,ENSP00000239461,ENSP00000242462,ENSP00000244745,ENSP00000249501,ENSP00000253968,ENSP00000257555,ENSP00000259915,ENSP00000262238,ENSP00000262965,ENSP00000263253,ENSP00000263334,ENSP00000265354,ENSP00000265990,ENSP00000266304,ENSP00000283921,ENSP00000284000,ENSP00000290295…	ATF3,BARX1,BCL6,BCL6B,BPTF,BSX,BTAF1,CDC5L,CDX1,CEBPA,CEBPB,CEBPD,CEBPG,CRX,DBX1,DBX2,DMRT1,DMRT2,DMRTA2,ENSG00000173575,EP300,FOXD1,FOXI1,FOXJ1,FOXJ2,FOXK1,FOXL1,FOXP1,GABPA,GFI1,GFI1B,HDAC2,HES1,HEY1,HNF1A,HNF4A,HOXA10,HOXA5,HOXA9,HOXB13,HOXB4,HOXB9,HOXD10,IL6,IRX6,JUN,LHX3,MAF,MEF2A,MYC,NEUROG3,NKX6-1,NOBOX,NR2F2,NR3C1,NR6A1,PAX4,PAX5,PAX6,PAX8,PBX1,PITX2,POU1F1,POU2F2,POU3F2,POU3F4,POU5F1,POU…
GO:0006351	transcription, DNA-templated	81	2569	1.57e-51	ENSP00000162391,ENSP00000221996,ENSP00000222584,ENSP00000222726,ENSP00000231509,ENSP00000231656,ENSP00000232424,ENSP00000233638,ENSP00000242462,ENSP00000244745,ENSP00000249501,ENSP00000253968,ENSP00000257555,ENSP00000259915,ENSP00000262238,ENSP00000262965,ENSP00000263253,ENSP00000263334,ENSP00000265354,ENSP00000266304,ENSP00000283921,ENSP00000284000,ENSP00000290295,ENSP00000295886,ENSP00000297338…	ATF3,BARX1,BCL6,BPTF,BSX,CDC5L,CDX1,CEBPA,CEBPB,CEBPD,CEBPG,CRX,DMRT1,DMRT2,ENSG00000173575,EP300,FOXD1,FOXI1,FOXJ1,FOXJ2,FOXK1,FOXL1,FOXP1,GABPA,GFI1,GFI1B,HDAC2,HES1,HEY1,HNF1A,HNF4A,HOXA10,HOXA5,HOXA9,HOXB13,HOXB4,HOXB9,HOXD10,JUN,LHX3,MAF,MEF2A,MYC,NEUROG3,NKX6-1,NOBOX,NR2F2,NR3C1,NR6A1,PAX4,PAX5,PAX6,PAX8,PBX1,PITX2,POU1F1,POU2F2,POU3F2,POU3F4,POU5F1,POU6F1,RAD21,REST,RREB1,RXRA,SERTAD2,SIX5…
GO:0045893	positive regulation of transcription, DNA-templated	68	1435	9.91e-51	ENSP00000162391,ENSP00000221996,ENSP00000222726,ENSP00000231509,ENSP00000231656,ENSP00000232424,ENSP00000233638,ENSP00000239461,ENSP00000242462,ENSP00000244745,ENSP00000249501,ENSP00000253968,ENSP00000257555,ENSP00000259915,ENSP00000262238,ENSP00000262965,ENSP00000263253,ENSP00000263334,ENSP00000265354,ENSP00000266304,ENSP00000283921,ENSP00000284000,ENSP00000295886,ENSP00000297338,ENSP00000304169…	ATF3,BARX1,BPTF,BSX,CDC5L,CDX1,CEBPA,CEBPB,CEBPD,CEBPG,CRX,DMRT1,DMRT2,EP300,FOXD1,FOXI1,FOXJ1,FOXJ2,FOXK1,GABPA,HDAC2,HES1,HEY1,HNF1A,HNF4A,HOXA10,HOXA5,HOXB4,HOXB9,HOXD10,IL6,JUN,LHX3,MAF,MEF2A,MYC,NEUROG3,NKX6-1,NR2F2,NR3C1,NR6A1,PAX5,PAX6,PAX8,PBX1,PITX2,POU1F1,POU2F2,POU3F2,POU5F1,PRRX1,RAD21,REST,RREB1,RXRA,SERTAD2,SIX5,SOX4,SP1,SRF,TCF12,TCF3,TEF,TLX2,VDR,YY1,ZBTB16,ZEB1
GO:0045944	positive regulation of transcription by RNA polymerase II	63	1104	1.4e-50	ENSP00000162391,ENSP00000221996,ENSP00000222726,ENSP00000231509,ENSP00000231656,ENSP00000232424,ENSP00000233638,ENSP00000239461,ENSP00000242462,ENSP00000244745,ENSP00000249501,ENSP00000253968,ENSP00000257555,ENSP00000259915,ENSP00000262238,ENSP00000262965,ENSP00000263253,ENSP00000263334,ENSP00000265354,ENSP00000266304,ENSP00000283921,ENSP00000284000,ENSP00000295886,ENSP00000297338,ENSP00000304169…	ATF3,BARX1,BSX,CDC5L,CDX1,CEBPA,CEBPB,CEBPD,CEBPG,CRX,DMRT1,DMRT2,EP300,FOXD1,FOXI1,FOXJ1,FOXJ2,GABPA,HDAC2,HES1,HEY1,HNF1A,HNF4A,HOXA10,HOXA5,HOXB4,HOXB9,HOXD10,IL6,JUN,LHX3,MAF,MEF2A,MYC,NEUROG3,NKX6-1,NR3C1,NR6A1,PAX5,PAX6,PAX8,PBX1,PITX2,POU1F1,POU2F2,POU3F2,POU5F1,PRRX1,RAD21,REST,RREB1,RXRA,SIX5,SOX4,SP1,SRF,TCF12,TCF3,TEF,TLX2,VDR,YY1,ZEB1
GO:1903508	positive regulation of nucleic acid-templated transcription	69	1520	1.4e-50	ENSP00000162391,ENSP00000221996,ENSP00000222584,ENSP00000222726,ENSP00000231509,ENSP00000231656,ENSP00000232424,ENSP00000233638,ENSP00000239461,ENSP00000242462,ENSP00000244745,ENSP00000249501,ENSP00000253968,ENSP00000257555,ENSP00000259915,ENSP00000262238,ENSP00000262965,ENSP00000263253,ENSP00000263334,ENSP00000265354,ENSP00000266304,ENSP00000283921,ENSP00000284000,ENSP00000295886,ENSP00000297338…	ATF3,BARX1,BPTF,BSX,CDC5L,CDX1,CEBPA,CEBPB,CEBPD,CEBPG,CRX,DMRT1,DMRT2,EP300,FOXD1,FOXI1,FOXJ1,FOXJ2,FOXK1,GABPA,HDAC2,HES1,HEY1,HNF1A,HNF4A,HOXA10,HOXA5,HOXB4,HOXB9,HOXD10,IL6,JUN,LHX3,MAF,MEF2A,MYC,NEUROG3,NKX6-1,NR2F2,NR3C1,NR6A1,PAX5,PAX6,PAX8,PBX1,PITX2,POU1F1,POU2F2,POU3F2,POU5F1,PRRX1,RAD21,REST,RREB1,RXRA,SERTAD2,SIX5,SOX4,SP1,SP4,SRF,TCF12,TCF3,TEF,TLX2,VDR,YY1,ZBTB16,ZEB1
GO:0010557	positive regulation of macromolecule biosynthetic process	71	1758	2.37e-49	ENSP00000162391,ENSP00000221996,ENSP00000222584,ENSP00000222726,ENSP00000231509,ENSP00000231656,ENSP00000232424,ENSP00000233638,ENSP00000239461,ENSP00000242462,ENSP00000244745,ENSP00000246657,ENSP00000249501,ENSP00000253968,ENSP00000257555,ENSP00000259915,ENSP00000262238,ENSP00000262965,ENSP00000263253,ENSP00000263334,ENSP00000265354,ENSP00000266304,ENSP00000283921,ENSP00000284000,ENSP00000295886…	ATF3,BARX1,BPTF,BSX,CCR7,CDC5L,CDX1,CEBPA,CEBPB,CEBPD,CEBPG,CRX,DMRT1,DMRT2,EP300,FOXD1,FOXI1,FOXJ1,FOXJ2,FOXK1,GABPA,HDAC2,HES1,HEY1,HNF1A,HNF4A,HOXA10,HOXA5,HOXB4,HOXB9,HOXD10,IL6,JUN,LHX3,MAF,MEF2A,MYC,NEUROG3,NKX6-1,NR2F2,NR3C1,NR6A1,PAX5,PAX6,PAX8,PBX1,PITX2,POU1F1,POU2F2,POU3F2,POU5F1,PRRX1,RAD21,REST,RREB1,RXRA,SERTAD2,SIX5,SOAT1,SOX4,SP1,SP4,SRF,TCF12,TCF3,TEF,TLX2,VDR,YY1,ZBTB16,ZEB1
GO:0051254	positive regulation of RNA metabolic process	69	1596	2.46e-49	ENSP00000162391,ENSP00000221996,ENSP00000222584,ENSP00000222726,ENSP00000231509,ENSP00000231656,ENSP00000232424,ENSP00000233638,ENSP00000239461,ENSP00000242462,ENSP00000244745,ENSP00000249501,ENSP00000253968,ENSP00000257555,ENSP00000259915,ENSP00000262238,ENSP00000262965,ENSP00000263253,ENSP00000263334,ENSP00000265354,ENSP00000266304,ENSP00000283921,ENSP00000284000,ENSP00000295886,ENSP00000297338…	ATF3,BARX1,BPTF,BSX,CDC5L,CDX1,CEBPA,CEBPB,CEBPD,CEBPG,CRX,DMRT1,DMRT2,EP300,FOXD1,FOXI1,FOXJ1,FOXJ2,FOXK1,GABPA,HDAC2,HES1,HEY1,HNF1A,HNF4A,HOXA10,HOXA5,HOXB4,HOXB9,HOXD10,IL6,JUN,LHX3,MAF,MEF2A,MYC,NEUROG3,NKX6-1,NR2F2,NR3C1,NR6A1,PAX5,PAX6,PAX8,PBX1,PITX2,POU1F1,POU2F2,POU3F2,POU5F1,PRRX1,RAD21,REST,RREB1,RXRA,SERTAD2,SIX5,SOX4,SP1,SP4,SRF,TCF12,TCF3,TEF,TLX2,VDR,YY1,ZBTB16,ZEB1
GO:0031328	positive regulation of cellular biosynthetic process	71	1846	5.6e-48	ENSP00000162391,ENSP00000221996,ENSP00000222584,ENSP00000222726,ENSP00000231509,ENSP00000231656,ENSP00000232424,ENSP00000233638,ENSP00000239461,ENSP00000242462,ENSP00000244745,ENSP00000246657,ENSP00000249501,ENSP00000253968,ENSP00000257555,ENSP00000259915,ENSP00000262238,ENSP00000262965,ENSP00000263253,ENSP00000263334,ENSP00000265354,ENSP00000266304,ENSP00000283921,ENSP00000284000,ENSP00000295886…	ATF3,BARX1,BPTF,BSX,CCR7,CDC5L,CDX1,CEBPA,CEBPB,CEBPD,CEBPG,CRX,DMRT1,DMRT2,EP300,FOXD1,FOXI1,FOXJ1,FOXJ2,FOXK1,GABPA,HDAC2,HES1,HEY1,HNF1A,HNF4A,HOXA10,HOXA5,HOXB4,HOXB9,HOXD10,IL6,JUN,LHX3,MAF,MEF2A,MYC,NEUROG3,NKX6-1,NR2F2,NR3C1,NR6A1,PAX5,PAX6,PAX8,PBX1,PITX2,POU1F1,POU2F2,POU3F2,POU5F1,PRRX1,RAD21,REST,RREB1,RXRA,SERTAD2,SIX5,SOAT1,SOX4,SP1,SP4,SRF,TCF12,TCF3,TEF,TLX2,VDR,YY1,ZBTB16,ZEB1
GO:0045935	positive regulation of nucleobase-containing compound metabolic process	70	1770	7.87e-48	ENSP00000162391,ENSP00000221996,ENSP00000222584,ENSP00000222726,ENSP00000231509,ENSP00000231656,ENSP00000232424,ENSP00000233638,ENSP00000239461,ENSP00000242462,ENSP00000244745,ENSP00000249501,ENSP00000253968,ENSP00000257555,ENSP00000259915,ENSP00000262238,ENSP00000262965,ENSP00000263253,ENSP00000263334,ENSP00000265354,ENSP00000266304,ENSP00000283921,ENSP00000284000,ENSP00000295886,ENSP00000297338…	ATF3,BARX1,BPTF,BSX,CDC5L,CDX1,CEBPA,CEBPB,CEBPD,CEBPG,CRX,DMRT1,DMRT2,EP300,FOXD1,FOXI1,FOXJ1,FOXJ2,FOXK1,GABPA,HDAC2,HES1,HEY1,HNF1A,HNF4A,HOXA10,HOXA5,HOXB4,HOXB9,HOXD10,IL6,JUN,LHX3,MAF,MEF2A,MYC,NEUROG3,NKX6-1,NR2F2,NR3C1,NR6A1,PAX5,PAX6,PAX8,PBX1,PITX2,POU1F1,POU2F2,POU3F2,POU5F1,PRRX1,RAD21,REST,RREB1,RXRA,SERTAD2,SIX5,SOX4,SP1,SP4,SRF,TCF12,TCF3,TEF,TLX2,USP7,VDR,YY1,ZBTB16,ZEB1
GO:0034654	nucleobase-containing compound biosynthetic process	82	3031	8.54e-48	ENSP00000162391,ENSP00000221996,ENSP00000222584,ENSP00000222726,ENSP00000231509,ENSP00000231656,ENSP00000232424,ENSP00000233638,ENSP00000242462,ENSP00000244745,ENSP00000249501,ENSP00000253968,ENSP00000257555,ENSP00000259915,ENSP00000262238,ENSP00000262965,ENSP00000263253,ENSP00000263334,ENSP00000265354,ENSP00000266304,ENSP00000283921,ENSP00000284000,ENSP00000290295,ENSP00000295886,ENSP00000297338…	ACOT7,ATF3,BARX1,BCL6,BPTF,BSX,CDC5L,CDX1,CEBPA,CEBPB,CEBPD,CEBPG,CRX,DMRT1,DMRT2,ENSG00000173575,EP300,FOXD1,FOXI1,FOXJ1,FOXJ2,FOXK1,FOXL1,FOXP1,GABPA,GFI1,GFI1B,HDAC2,HES1,HEY1,HNF1A,HNF4A,HOXA10,HOXA5,HOXA9,HOXB13,HOXB4,HOXB9,HOXD10,JUN,LHX3,MAF,MEF2A,MYC,NEUROG3,NKX6-1,NOBOX,NR2F2,NR3C1,NR6A1,PAX4,PAX5,PAX6,PAX8,PBX1,PITX2,POU1F1,POU2F2,POU3F2,POU3F4,POU5F1,POU6F1,RAD21,REST,RREB1,RXRA,SERTAD…
GO:0044271	cellular nitrogen compound biosynthetic process	83	3528	3.78e-44	ENSP00000162391,ENSP00000221996,ENSP00000222584,ENSP00000222726,ENSP00000231509,ENSP00000231656,ENSP00000232424,ENSP00000233638,ENSP00000242462,ENSP00000244745,ENSP00000249501,ENSP00000253968,ENSP00000257555,ENSP00000259915,ENSP00000262238,ENSP00000262965,ENSP00000263253,ENSP00000263334,ENSP00000265354,ENSP00000266304,ENSP00000283921,ENSP00000284000,ENSP00000290295,ENSP00000295886,ENSP00000297338…	ACOT7,ATF3,BARX1,BCL6,BPTF,BSX,CDC5L,CDX1,CEBPA,CEBPB,CEBPD,CEBPG,CRX,DMRT1,DMRT2,ENSG00000173575,EP300,FOXD1,FOXI1,FOXJ1,FOXJ2,FOXK1,FOXL1,FOXP1,GABPA,GFI1,GFI1B,HDAC2,HES1,HEY1,HNF1A,HNF4A,HOXA10,HOXA5,HOXA9,HOXB13,HOXB4,HOXB9,HOXD10,JUN,LHX3,MAF,MEF2A,MYC,NEUROG3,NKX6-1,NOBOX,NR2F2,NR3C1,NR6A1,PAX4,PAX5,PAX6,PAX8,PBX1,PITX2,POU1F1,POU2F2,POU3F2,POU3F4,POU5F1,POU6F1,QRSL1,RAD21,REST,RREB1,RXRA,…
GO:0016070	RNA metabolic process	82	3430	9.5e-44	ENSP00000162391,ENSP00000221996,ENSP00000222584,ENSP00000222726,ENSP00000231509,ENSP00000231656,ENSP00000232424,ENSP00000233638,ENSP00000242462,ENSP00000244745,ENSP00000249501,ENSP00000253968,ENSP00000257555,ENSP00000259915,ENSP00000262238,ENSP00000262965,ENSP00000263253,ENSP00000263334,ENSP00000265354,ENSP00000266304,ENSP00000283921,ENSP00000284000,ENSP00000290295,ENSP00000295886,ENSP00000297338…	ATF3,BARX1,BCL6,BPTF,BSX,CDC5L,CDX1,CEBPA,CEBPB,CEBPD,CEBPG,CRX,DMRT1,DMRT2,ENSG00000173575,EP300,FOXD1,FOXI1,FOXJ1,FOXJ2,FOXK1,FOXL1,FOXP1,GABPA,GFI1,GFI1B,HDAC2,HES1,HEY1,HNF1A,HNF4A,HOXA10,HOXA5,HOXA9,HOXB13,HOXB4,HOXB9,HOXD10,JUN,LHX3,MAF,MEF2A,MYC,NEUROG3,NKX6-1,NOBOX,NR2F2,NR3C1,NR6A1,PAX4,PAX5,PAX6,PAX8,PBX1,PITX2,POU1F1,POU2F2,POU3F2,POU3F4,POU5F1,POU6F1,QRSL1,RAD21,REST,RREB1,RXRA,SERTAD…
GO:0006366	transcription by RNA polymerase II	52	784	3.39e-43	ENSP00000162391,ENSP00000221996,ENSP00000222726,ENSP00000231509,ENSP00000231656,ENSP00000233638,ENSP00000242462,ENSP00000244745,ENSP00000249501,ENSP00000253968,ENSP00000257555,ENSP00000259915,ENSP00000263253,ENSP00000263334,ENSP00000265354,ENSP00000266304,ENSP00000283921,ENSP00000284000,ENSP00000295886,ENSP00000297338,ENSP00000304169,ENSP00000304286,ENSP00000305422,ENSP00000311816,ENSP00000312987…	ATF3,BARX1,CDC5L,CDX1,CEBPA,CEBPB,CEBPD,CEBPG,CRX,DMRT1,EP300,FOXD1,FOXI1,FOXJ1,FOXJ2,GABPA,GFI1B,HNF1A,HNF4A,HOXA10,HOXA5,HOXD10,JUN,LHX3,MAF,MEF2A,MYC,NEUROG3,NKX6-1,NR3C1,NR6A1,PAX5,PAX6,PAX8,PBX1,PITX2,POU1F1,POU2F2,POU3F2,POU3F4,POU5F1,RAD21,REST,RREB1,RXRA,SOX4,SP1,SRF,TCF12,TEF,TLX2,VDR
GO:0034645	cellular macromolecule biosynthetic process	82	3518	6.37e-43	ENSP00000162391,ENSP00000221996,ENSP00000222584,ENSP00000222726,ENSP00000231509,ENSP00000231656,ENSP00000232424,ENSP00000233638,ENSP00000242462,ENSP00000244745,ENSP00000249501,ENSP00000253968,ENSP00000257555,ENSP00000259915,ENSP00000262238,ENSP00000262965,ENSP00000263253,ENSP00000263334,ENSP00000265354,ENSP00000266304,ENSP00000283921,ENSP00000284000,ENSP00000290295,ENSP00000295886,ENSP00000297338…	ATF3,BARX1,BCL6,BPTF,BSX,CDC5L,CDX1,CEBPA,CEBPB,CEBPD,CEBPG,CRX,DMRT1,DMRT2,ENSG00000173575,EP300,FOXD1,FOXI1,FOXJ1,FOXJ2,FOXK1,FOXL1,FOXP1,GABPA,GFI1,GFI1B,HDAC2,HES1,HEY1,HNF1A,HNF4A,HOXA10,HOXA5,HOXA9,HOXB13,HOXB4,HOXB9,HOXD10,JUN,LHX3,MAF,MEF2A,MYC,NEUROG3,NKX6-1,NOBOX,NR2F2,NR3C1,NR6A1,PAX4,PAX5,PAX6,PAX8,PBX1,PITX2,POU1F1,POU2F2,POU3F2,POU3F4,POU5F1,POU6F1,QRSL1,RAD21,REST,RREB1,RXRA,SERTAD…
GO:0010467	gene expression	83	3733	2.75e-42	ENSP00000162391,ENSP00000221996,ENSP00000222584,ENSP00000222726,ENSP00000231509,ENSP00000231656,ENSP00000232424,ENSP00000233638,ENSP00000242462,ENSP00000244745,ENSP00000249501,ENSP00000253968,ENSP00000257555,ENSP00000259915,ENSP00000262238,ENSP00000262965,ENSP00000263253,ENSP00000263334,ENSP00000265354,ENSP00000266304,ENSP00000283921,ENSP00000284000,ENSP00000290295,ENSP00000295886,ENSP00000297338…	ATF3,BAD,BARX1,BCL6,BPTF,BSX,CDC5L,CDX1,CEBPA,CEBPB,CEBPD,CEBPG,CRX,DMRT1,DMRT2,ENSG00000173575,EP300,FOXD1,FOXI1,FOXJ1,FOXJ2,FOXK1,FOXL1,FOXP1,GABPA,GFI1,GFI1B,HDAC2,HES1,HEY1,HNF1A,HNF4A,HOXA10,HOXA5,HOXA9,HOXB13,HOXB4,HOXB9,HOXD10,JUN,LHX3,MAF,MEF2A,MYC,NEUROG3,NKX6-1,NOBOX,NR2F2,NR3C1,NR6A1,PAX4,PAX5,PAX6,PAX8,PBX1,PITX2,POU1F1,POU2F2,POU3F2,POU3F4,POU5F1,POU6F1,QRSL1,RAD21,REST,RREB1,RXRA,SE…
GO:0051171	regulation of nitrogen compound metabolic process	94	5827	4.64e-42	ENSP00000162391,ENSP00000221996,ENSP00000222584,ENSP00000222726,ENSP00000231509,ENSP00000231656,ENSP00000232424,ENSP00000233638,ENSP00000239461,ENSP00000242462,ENSP00000244745,ENSP00000246657,ENSP00000249501,ENSP00000253968,ENSP00000257555,ENSP00000259915,ENSP00000262238,ENSP00000262965,ENSP00000263253,ENSP00000263334,ENSP00000265354,ENSP00000265990,ENSP00000266304,ENSP00000283921,ENSP00000284000…	ATF3,BAD,BARX1,BCL6,BCL6B,BPTF,BSX,BTAF1,CCR7,CDC5L,CDX1,CEBPA,CEBPB,CEBPD,CEBPG,CRX,DBX1,DBX2,DMRT1,DMRT2,DMRTA2,ENSG00000173575,EP300,FOXD1,FOXI1,FOXJ1,FOXJ2,FOXK1,FOXL1,FOXP1,GABPA,GFI1,GFI1B,HDAC2,HES1,HEY1,HNF1A,HNF4A,HOXA10,HOXA5,HOXA9,HOXB13,HOXB4,HOXB9,HOXD10,IL6,IRX6,JUN,LHX3,MAF,MEF2A,MYC,NEUROG3,NKX6-1,NOBOX,NR2F2,NR3C1,NR6A1,PAX4,PAX5,PAX6,PAX8,PBX1,PITX2,POU1F1,POU2F2,POU3F2,POU3F4,P…
GO:0080090	regulation of primary metabolic process	94	5982	4.99e-41	ENSP00000162391,ENSP00000221996,ENSP00000222584,ENSP00000222726,ENSP00000231509,ENSP00000231656,ENSP00000232424,ENSP00000233638,ENSP00000239461,ENSP00000242462,ENSP00000244745,ENSP00000246657,ENSP00000249501,ENSP00000253968,ENSP00000257555,ENSP00000259915,ENSP00000262238,ENSP00000262965,ENSP00000263253,ENSP00000263334,ENSP00000265354,ENSP00000265990,ENSP00000266304,ENSP00000283921,ENSP00000284000…	ATF3,BAD,BARX1,BCL6,BCL6B,BPTF,BSX,BTAF1,CCR7,CDC5L,CDX1,CEBPA,CEBPB,CEBPD,CEBPG,CRX,DBX1,DBX2,DMRT1,DMRT2,DMRTA2,ENSG00000173575,EP300,FOXD1,FOXI1,FOXJ1,FOXJ2,FOXK1,FOXL1,FOXP1,GABPA,GFI1,GFI1B,HDAC2,HES1,HEY1,HNF1A,HNF4A,HOXA10,HOXA5,HOXA9,HOXB13,HOXB4,HOXB9,HOXD10,IL6,IRX6,JUN,LHX3,MAF,MEF2A,MYC,NEUROG3,NKX6-1,NOBOX,NR2F2,NR3C1,NR6A1,PAX4,PAX5,PAX6,PAX8,PBX1,PITX2,POU1F1,POU2F2,POU3F2,POU3F4,P…
GO:0090304	nucleic acid metabolic process	83	3941	1.78e-40	ENSP00000162391,ENSP00000221996,ENSP00000222584,ENSP00000222726,ENSP00000231509,ENSP00000231656,ENSP00000232424,ENSP00000233638,ENSP00000242462,ENSP00000244745,ENSP00000249501,ENSP00000253968,ENSP00000257555,ENSP00000259915,ENSP00000262238,ENSP00000262965,ENSP00000263253,ENSP00000263334,ENSP00000265354,ENSP00000266304,ENSP00000283921,ENSP00000284000,ENSP00000290295,ENSP00000295886,ENSP00000297338…	ATF3,BARX1,BCL6,BPTF,BSX,CDC5L,CDX1,CEBPA,CEBPB,CEBPD,CEBPG,CRX,DMRT1,DMRT2,ENSG00000173575,EP300,FOXD1,FOXI1,FOXJ1,FOXJ2,FOXK1,FOXL1,FOXP1,GABPA,GFI1,GFI1B,HDAC2,HES1,HEY1,HNF1A,HNF4A,HOXA10,HOXA5,HOXA9,HOXB13,HOXB4,HOXB9,HOXD10,JUN,LHX3,MAF,MEF2A,MYC,NEUROG3,NKX6-1,NOBOX,NR2F2,NR3C1,NR6A1,PAX4,PAX5,PAX6,PAX8,PBX1,PITX2,POU1F1,POU2F2,POU3F2,POU3F4,POU5F1,POU6F1,QRSL1,RAD21,REST,RREB1,RXRA,SERTAD…
GO:0060255	regulation of macromolecule metabolic process	94	6072	1.85e-40	ENSP00000162391,ENSP00000221996,ENSP00000222584,ENSP00000222726,ENSP00000231509,ENSP00000231656,ENSP00000232424,ENSP00000233638,ENSP00000239461,ENSP00000242462,ENSP00000244745,ENSP00000246657,ENSP00000249501,ENSP00000253968,ENSP00000257555,ENSP00000259915,ENSP00000262238,ENSP00000262965,ENSP00000263253,ENSP00000263334,ENSP00000265354,ENSP00000265990,ENSP00000266304,ENSP00000283921,ENSP00000284000…	ATF3,BAD,BARX1,BCL6,BCL6B,BPTF,BSX,BTAF1,CCR7,CDC5L,CDX1,CEBPA,CEBPB,CEBPD,CEBPG,CRX,DBX1,DBX2,DMRT1,DMRT2,DMRTA2,ENSG00000173575,EP300,FOXD1,FOXI1,FOXJ1,FOXJ2,FOXK1,FOXL1,FOXP1,GABPA,GFI1,GFI1B,HDAC2,HES1,HEY1,HNF1A,HNF4A,HOXA10,HOXA5,HOXA9,HOXB13,HOXB4,HOXB9,HOXD10,IL6,IRX6,JUN,LHX3,MAF,MEF2A,MYC,NEUROG3,NKX6-1,NOBOX,NR2F2,NR3C1,NR6A1,PAX4,PAX5,PAX6,PAX8,PBX1,PITX2,POU1F1,POU2F2,POU3F2,POU3F4,P…
GO:0031323	regulation of cellular metabolic process	94	6082	2.1e-40	ENSP00000162391,ENSP00000221996,ENSP00000222584,ENSP00000222726,ENSP00000231509,ENSP00000231656,ENSP00000232424,ENSP00000233638,ENSP00000239461,ENSP00000242462,ENSP00000244745,ENSP00000246657,ENSP00000249501,ENSP00000253968,ENSP00000257555,ENSP00000259915,ENSP00000262238,ENSP00000262965,ENSP00000263253,ENSP00000263334,ENSP00000265354,ENSP00000265990,ENSP00000266304,ENSP00000283921,ENSP00000284000…	ATF3,BAD,BARX1,BCL6,BCL6B,BPTF,BSX,BTAF1,CCR7,CDC5L,CDX1,CEBPA,CEBPB,CEBPD,CEBPG,CRX,DBX1,DBX2,DMRT1,DMRT2,DMRTA2,ENSG00000173575,EP300,FOXD1,FOXI1,FOXJ1,FOXJ2,FOXK1,FOXL1,FOXP1,GABPA,GFI1,GFI1B,HDAC2,HES1,HEY1,HNF1A,HNF4A,HOXA10,HOXA5,HOXA9,HOXB13,HOXB4,HOXB9,HOXD10,IL6,IRX6,JUN,LHX3,MAF,MEF2A,MYC,NEUROG3,NKX6-1,NOBOX,NR2F2,NR3C1,NR6A1,PAX4,PAX5,PAX6,PAX8,PBX1,PITX2,POU1F1,POU2F2,POU3F2,POU3F4,P…
GO:0051173	positive regulation of nitrogen compound metabolic process	74	2946	2.12e-38	ENSP00000162391,ENSP00000221996,ENSP00000222584,ENSP00000222726,ENSP00000231509,ENSP00000231656,ENSP00000232424,ENSP00000233638,ENSP00000239461,ENSP00000242462,ENSP00000244745,ENSP00000246657,ENSP00000249501,ENSP00000253968,ENSP00000257555,ENSP00000259915,ENSP00000262238,ENSP00000262965,ENSP00000263253,ENSP00000263334,ENSP00000265354,ENSP00000266304,ENSP00000283921,ENSP00000284000,ENSP00000295886…	ATF3,BAD,BARX1,BCL6,BPTF,BSX,CCR7,CDC5L,CDX1,CEBPA,CEBPB,CEBPD,CEBPG,CRX,DMRT1,DMRT2,EP300,FOXD1,FOXI1,FOXJ1,FOXJ2,FOXK1,GABPA,HDAC2,HES1,HEY1,HNF1A,HNF4A,HOXA10,HOXA5,HOXB4,HOXB9,HOXD10,IL6,JUN,LHX3,MAF,MEF2A,MYC,NEUROG3,NKX6-1,NR2F2,NR3C1,NR6A1,PAX5,PAX6,PAX8,PBX1,PITX2,POU1F1,POU2F2,POU3F2,POU5F1,PRRX1,RAD21,REST,RREB1,RXRA,SERTAD2,SIX5,SOAT1,SOX4,SP1,SP4,SRF,TCF12,TCF3,TEF,TLX2,USP7,VDR,YY1,Z…
GO:0006139	nucleobase-containing compound metabolic process	85	4551	3.4e-38	ENSP00000162391,ENSP00000221996,ENSP00000222584,ENSP00000222726,ENSP00000231509,ENSP00000231656,ENSP00000232424,ENSP00000233638,ENSP00000242462,ENSP00000244745,ENSP00000249501,ENSP00000253968,ENSP00000257555,ENSP00000259915,ENSP00000262238,ENSP00000262965,ENSP00000263253,ENSP00000263334,ENSP00000265354,ENSP00000266304,ENSP00000283921,ENSP00000284000,ENSP00000290295,ENSP00000295886,ENSP00000297338…	ACOT7,ATF3,BAD,BARX1,BCL6,BPTF,BSX,CDC5L,CDX1,CEBPA,CEBPB,CEBPD,CEBPG,CRX,DMRT1,DMRT2,ENSG00000173575,EP300,FOXD1,FOXI1,FOXJ1,FOXJ2,FOXK1,FOXL1,FOXP1,GABPA,GFI1,GFI1B,HDAC2,HES1,HEY1,HNF1A,HNF4A,HOXA10,HOXA5,HOXA9,HOXB13,HOXB4,HOXB9,HOXD10,JUN,LHX3,MAF,MEF2A,MYC,NEUROG3,NKX6-1,NOBOX,NR2F2,NR3C1,NR6A1,PAX4,PAX5,PAX6,PAX8,PBX1,PITX2,POU1F1,POU2F2,POU3F2,POU3F4,POU5F1,POU6F1,QRSL1,RAD21,REST,RREB1,R…
GO:0031325	positive regulation of cellular metabolic process	74	3060	2.69e-37	ENSP00000162391,ENSP00000221996,ENSP00000222584,ENSP00000222726,ENSP00000231509,ENSP00000231656,ENSP00000232424,ENSP00000233638,ENSP00000239461,ENSP00000242462,ENSP00000244745,ENSP00000246657,ENSP00000249501,ENSP00000253968,ENSP00000257555,ENSP00000259915,ENSP00000262238,ENSP00000262965,ENSP00000263253,ENSP00000263334,ENSP00000265354,ENSP00000266304,ENSP00000283921,ENSP00000284000,ENSP00000295886…	ATF3,BAD,BARX1,BCL6,BPTF,BSX,CCR7,CDC5L,CDX1,CEBPA,CEBPB,CEBPD,CEBPG,CRX,DMRT1,DMRT2,EP300,FOXD1,FOXI1,FOXJ1,FOXJ2,FOXK1,GABPA,HDAC2,HES1,HEY1,HNF1A,HNF4A,HOXA10,HOXA5,HOXB4,HOXB9,HOXD10,IL6,JUN,LHX3,MAF,MEF2A,MYC,NEUROG3,NKX6-1,NR2F2,NR3C1,NR6A1,PAX5,PAX6,PAX8,PBX1,PITX2,POU1F1,POU2F2,POU3F2,POU5F1,PRRX1,RAD21,REST,RREB1,RXRA,SERTAD2,SIX5,SOAT1,SOX4,SP1,SP4,SRF,TCF12,TCF3,TEF,TLX2,USP7,VDR,YY1,Z…
GO:0010604	positive regulation of macromolecule metabolic process	74	3081	4.21e-37	ENSP00000162391,ENSP00000221996,ENSP00000222584,ENSP00000222726,ENSP00000231509,ENSP00000231656,ENSP00000232424,ENSP00000233638,ENSP00000239461,ENSP00000242462,ENSP00000244745,ENSP00000246657,ENSP00000249501,ENSP00000253968,ENSP00000257555,ENSP00000259915,ENSP00000262238,ENSP00000262965,ENSP00000263253,ENSP00000263334,ENSP00000265354,ENSP00000266304,ENSP00000283921,ENSP00000284000,ENSP00000295886…	ATF3,BAD,BARX1,BCL6,BPTF,BSX,CCR7,CDC5L,CDX1,CEBPA,CEBPB,CEBPD,CEBPG,CRX,DMRT1,DMRT2,EP300,FOXD1,FOXI1,FOXJ1,FOXJ2,FOXK1,GABPA,HDAC2,HES1,HEY1,HNF1A,HNF4A,HOXA10,HOXA5,HOXB4,HOXB9,HOXD10,IL6,JUN,LHX3,MAF,MEF2A,MYC,NEUROG3,NKX6-1,NR2F2,NR3C1,NR6A1,PAX5,PAX6,PAX8,PBX1,PITX2,POU1F1,POU2F2,POU3F2,POU5F1,PRRX1,RAD21,REST,RREB1,RXRA,SERTAD2,SIX5,SOAT1,SOX4,SP1,SP4,SRF,TCF12,TCF3,TEF,TLX2,USP7,VDR,YY1,Z…
GO:1901360	organic cyclic compound metabolic process	86	4963	1.6e-36	ENSP00000162391,ENSP00000221996,ENSP00000222584,ENSP00000222726,ENSP00000231509,ENSP00000231656,ENSP00000232424,ENSP00000233638,ENSP00000242462,ENSP00000244745,ENSP00000249501,ENSP00000253968,ENSP00000257555,ENSP00000259915,ENSP00000262238,ENSP00000262965,ENSP00000263253,ENSP00000263334,ENSP00000265354,ENSP00000266304,ENSP00000283921,ENSP00000284000,ENSP00000290295,ENSP00000295886,ENSP00000297338…	ACOT7,ATF3,BAD,BARX1,BCL6,BPTF,BSX,CDC5L,CDX1,CEBPA,CEBPB,CEBPD,CEBPG,CRX,DMRT1,DMRT2,ENSG00000173575,EP300,FOXD1,FOXI1,FOXJ1,FOXJ2,FOXK1,FOXL1,FOXP1,GABPA,GFI1,GFI1B,HDAC2,HES1,HEY1,HNF1A,HNF4A,HOXA10,HOXA5,HOXA9,HOXB13,HOXB4,HOXB9,HOXD10,JUN,LHX3,MAF,MEF2A,MYC,NEUROG3,NKX6-1,NOBOX,NR2F2,NR3C1,NR6A1,PAX4,PAX5,PAX6,PAX8,PBX1,PITX2,POU1F1,POU2F2,POU3F2,POU3F4,POU5F1,POU6F1,QRSL1,RAD21,REST,RREB1,R…
GO:1901576	organic substance biosynthetic process	83	4656	5.91e-35	ENSP00000162391,ENSP00000221996,ENSP00000222584,ENSP00000222726,ENSP00000231509,ENSP00000231656,ENSP00000232424,ENSP00000233638,ENSP00000242462,ENSP00000244745,ENSP00000249501,ENSP00000253968,ENSP00000257555,ENSP00000259915,ENSP00000262238,ENSP00000262965,ENSP00000263253,ENSP00000263334,ENSP00000265354,ENSP00000266304,ENSP00000283921,ENSP00000284000,ENSP00000290295,ENSP00000295886,ENSP00000297338…	ACOT7,ATF3,BARX1,BCL6,BPTF,BSX,CDC5L,CDX1,CEBPA,CEBPB,CEBPD,CEBPG,CRX,DMRT1,DMRT2,ENSG00000173575,EP300,FOXD1,FOXI1,FOXJ1,FOXJ2,FOXK1,FOXL1,FOXP1,GABPA,GFI1,GFI1B,HDAC2,HES1,HEY1,HNF1A,HNF4A,HOXA10,HOXA5,HOXA9,HOXB13,HOXB4,HOXB9,HOXD10,JUN,LHX3,MAF,MEF2A,MYC,NEUROG3,NKX6-1,NOBOX,NR2F2,NR3C1,NR6A1,PAX4,PAX5,PAX6,PAX8,PBX1,PITX2,POU1F1,POU2F2,POU3F2,POU3F4,POU5F1,POU6F1,QRSL1,RAD21,REST,RREB1,RXRA,…
GO:0000122	negative regulation of transcription by RNA polymerase II	44	809	3.57e-32	ENSP00000231509,ENSP00000232424,ENSP00000239461,ENSP00000242462,ENSP00000259915,ENSP00000262238,ENSP00000262965,ENSP00000263253,ENSP00000265354,ENSP00000290295,ENSP00000293805,ENSP00000295886,ENSP00000304169,ENSP00000305422,ENSP00000307208,ENSP00000311816,ENSP00000323670,ENSP00000323880,ENSP00000327048,ENSP00000328928,ENSP00000338157,ENSP00000338272,ENSP00000339906,ENSP00000342931,ENSP00000344352…	ATF3,BCL6,BCL6B,BPTF,CEBPA,CEBPB,DMRT1,EP300,FOXJ1,GABPA,GFI1,GFI1B,HDAC2,HES1,HEY1,HOXB13,HOXB4,JUN,MAF,MEF2A,MYC,NEUROG3,NKX6-1,NR2F2,NR3C1,NR6A1,PAX4,PAX5,PAX6,PITX2,POU1F1,POU5F1,POU6F1,PRRX1,REST,RREB1,RXRA,SRF,TCF3,VDR,YY1,ZBTB16,ZBTB7A,ZEB1
GO:0045892	negative regulation of transcription, DNA-templated	49	1169	1.93e-31	ENSP00000231509,ENSP00000232424,ENSP00000239461,ENSP00000242462,ENSP00000259915,ENSP00000262238,ENSP00000262965,ENSP00000263253,ENSP00000265354,ENSP00000265990,ENSP00000290295,ENSP00000293805,ENSP00000295886,ENSP00000304169,ENSP00000305422,ENSP00000307208,ENSP00000311816,ENSP00000316842,ENSP00000323670,ENSP00000323880,ENSP00000327048,ENSP00000328720,ENSP00000328928,ENSP00000338157,ENSP00000338272…	ATF3,BCL6,BCL6B,BPTF,BTAF1,CEBPA,CEBPB,DMRT1,EP300,FOXD1,FOXJ1,FOXK1,FOXP1,GABPA,GFI1,GFI1B,HDAC2,HES1,HEY1,HOXB13,HOXB4,JUN,MAF,MEF2A,MYC,NEUROG3,NKX6-1,NR2F2,NR3C1,NR6A1,PAX4,PAX5,PAX6,PITX2,POU1F1,POU5F1,POU6F1,PRRX1,REST,RREB1,RXRA,SIX5,SRF,TCF3,VDR,YY1,ZBTB16,ZBTB7A,ZEB1
GO:0048513	animal organ development	67	2926	1.12e-30	ENSP00000221996,ENSP00000222726,ENSP00000231656,ENSP00000232424,ENSP00000239461,ENSP00000242462,ENSP00000244745,ENSP00000246657,ENSP00000249501,ENSP00000253968,ENSP00000257555,ENSP00000259915,ENSP00000262238,ENSP00000262965,ENSP00000263253,ENSP00000263334,ENSP00000265354,ENSP00000283921,ENSP00000284000,ENSP00000290295,ENSP00000295886,ENSP00000304169,ENSP00000304286,ENSP00000305422,ENSP00000307208…	ATF3,BAD,BARX1,BCL6,BPTF,BSX,CCR7,CDX1,CEBPA,CEBPB,CEBPG,CRX,DBX1,DMRT1,DMRTA2,ENSG00000173575,EP300,FOXD1,FOXI1,FOXJ1,FOXK1,FOXL1,FOXP1,GFI1,HDAC2,HES1,HEY1,HNF1A,HOXA10,HOXA5,HOXB13,HOXB4,HOXB9,HOXD10,IL6,JUN,LHX3,MAF,MEF2A,MYC,NEUROG3,NKX6-1,NR2F2,PAX4,PAX5,PAX6,PAX8,PBX1,PITX2,POU1F1,POU2F2,POU3F2,POU3F4,POU5F1,POU6F1,PRRX1,REST,RXRA,SIX5,SOX4,SRF,TCF12,TCF3,VDR,YY1,ZBTB16,ZEB1
GO:0051253	negative regulation of RNA metabolic process	49	1303	2.32e-29	ENSP00000231509,ENSP00000232424,ENSP00000239461,ENSP00000242462,ENSP00000259915,ENSP00000262238,ENSP00000262965,ENSP00000263253,ENSP00000265354,ENSP00000265990,ENSP00000290295,ENSP00000293805,ENSP00000295886,ENSP00000304169,ENSP00000305422,ENSP00000307208,ENSP00000311816,ENSP00000316842,ENSP00000323670,ENSP00000323880,ENSP00000327048,ENSP00000328720,ENSP00000328928,ENSP00000338157,ENSP00000338272…	ATF3,BCL6,BCL6B,BPTF,BTAF1,CEBPA,CEBPB,DMRT1,EP300,FOXD1,FOXJ1,FOXK1,FOXP1,GABPA,GFI1,GFI1B,HDAC2,HES1,HEY1,HOXB13,HOXB4,JUN,MAF,MEF2A,MYC,NEUROG3,NKX6-1,NR2F2,NR3C1,NR6A1,PAX4,PAX5,PAX6,PITX2,POU1F1,POU5F1,POU6F1,PRRX1,REST,RREB1,RXRA,SIX5,SRF,TCF3,VDR,YY1,ZBTB16,ZBTB7A,ZEB1
GO:0032502	developmental process	82	5401	6.42e-29	ENSP00000162391,ENSP00000221996,ENSP00000222726,ENSP00000231656,ENSP00000232424,ENSP00000233638,ENSP00000239461,ENSP00000242462,ENSP00000244745,ENSP00000246657,ENSP00000249501,ENSP00000253968,ENSP00000257555,ENSP00000259915,ENSP00000262238,ENSP00000262965,ENSP00000263253,ENSP00000263334,ENSP00000265354,ENSP00000266304,ENSP00000283921,ENSP00000284000,ENSP00000290295,ENSP00000295886,ENSP00000304169…	ATF3,BAD,BARX1,BCL6,BPTF,BSX,CCR7,CDC5L,CDX1,CEBPA,CEBPB,CEBPG,CRX,DBX1,DMRT1,DMRT2,DMRTA2,ENSG00000173575,EP300,FOXD1,FOXI1,FOXJ1,FOXJ2,FOXK1,FOXL1,FOXP1,GABPA,GFI1,GFI1B,HDAC2,HES1,HEY1,HNF1A,HNF4A,HOXA10,HOXA5,HOXA9,HOXB13,HOXB4,HOXB9,HOXD10,IL6,JUN,LHX3,MAF,MEF2A,MYC,NEUROG3,NKX6-1,NOBOX,NR2F2,PAX4,PAX5,PAX6,PAX8,PBX1,PITX2,POU1F1,POU2F2,POU3F2,POU3F4,POU5F1,POU6F1,PRRX1,PRRX2,REST,RREB1,RXRA…
GO:0007275	multicellular organism development	78	4726	8.5e-29	ENSP00000221996,ENSP00000222726,ENSP00000231656,ENSP00000232424,ENSP00000233638,ENSP00000239461,ENSP00000242462,ENSP00000244745,ENSP00000246657,ENSP00000249501,ENSP00000253968,ENSP00000257555,ENSP00000259915,ENSP00000262238,ENSP00000262965,ENSP00000263253,ENSP00000263334,ENSP00000265354,ENSP00000266304,ENSP00000283921,ENSP00000284000,ENSP00000290295,ENSP00000295886,ENSP00000304169,ENSP00000304286…	ATF3,BAD,BARX1,BCL6,BPTF,BSX,CCR7,CDX1,CEBPA,CEBPB,CEBPG,CRX,DBX1,DMRT1,DMRT2,DMRTA2,ENSG00000173575,EP300,FOXD1,FOXI1,FOXJ1,FOXK1,FOXL1,FOXP1,GABPA,GFI1,GFI1B,HDAC2,HES1,HEY1,HNF1A,HOXA10,HOXA5,HOXA9,HOXB13,HOXB4,HOXB9,HOXD10,IL6,JUN,LHX3,MAF,MEF2A,MYC,NEUROG3,NKX6-1,NOBOX,NR2F2,PAX4,PAX5,PAX6,PAX8,PBX1,PITX2,POU1F1,POU2F2,POU3F2,POU3F4,POU5F1,POU6F1,PRRX1,PRRX2,REST,RREB1,RXRA,SIX5,SOX4,SRF,TCF…
GO:0010558	negative regulation of macromolecule biosynthetic process	50	1425	9.42e-29	ENSP00000231509,ENSP00000232424,ENSP00000239461,ENSP00000242462,ENSP00000259915,ENSP00000262238,ENSP00000262965,ENSP00000263253,ENSP00000265354,ENSP00000265990,ENSP00000290295,ENSP00000293805,ENSP00000295886,ENSP00000304169,ENSP00000305422,ENSP00000307208,ENSP00000311816,ENSP00000316842,ENSP00000323670,ENSP00000323880,ENSP00000327048,ENSP00000328720,ENSP00000328928,ENSP00000338157,ENSP00000338272…	ATF3,BCL6,BCL6B,BPTF,BTAF1,CEBPA,CEBPB,DMRT1,EP300,FOXD1,FOXJ1,FOXK1,FOXP1,GABPA,GFI1,GFI1B,HDAC2,HES1,HEY1,HOXB13,HOXB4,IL6,JUN,MAF,MEF2A,MYC,NEUROG3,NKX6-1,NR2F2,NR3C1,NR6A1,PAX4,PAX5,PAX6,PITX2,POU1F1,POU5F1,POU6F1,PRRX1,REST,RREB1,RXRA,SIX5,SRF,TCF3,VDR,YY1,ZBTB16,ZBTB7A,ZEB1
GO:0031327	negative regulation of cellular biosynthetic process	50	1479	4.93e-28	ENSP00000231509,ENSP00000232424,ENSP00000239461,ENSP00000242462,ENSP00000259915,ENSP00000262238,ENSP00000262965,ENSP00000263253,ENSP00000265354,ENSP00000265990,ENSP00000290295,ENSP00000293805,ENSP00000295886,ENSP00000304169,ENSP00000305422,ENSP00000307208,ENSP00000311816,ENSP00000316842,ENSP00000323670,ENSP00000323880,ENSP00000327048,ENSP00000328720,ENSP00000328928,ENSP00000338157,ENSP00000338272…	ATF3,BCL6,BCL6B,BPTF,BTAF1,CEBPA,CEBPB,DMRT1,EP300,FOXD1,FOXJ1,FOXK1,FOXP1,GABPA,GFI1,GFI1B,HDAC2,HES1,HEY1,HOXB13,HOXB4,IL6,JUN,MAF,MEF2A,MYC,NEUROG3,NKX6-1,NR2F2,NR3C1,NR6A1,PAX4,PAX5,PAX6,PITX2,POU1F1,POU5F1,POU6F1,PRRX1,REST,RREB1,RXRA,SIX5,SRF,TCF3,VDR,YY1,ZBTB16,ZBTB7A,ZEB1
GO:0048522	positive regulation of cellular process	78	4898	9.92e-28	ENSP00000162391,ENSP00000221996,ENSP00000222584,ENSP00000222726,ENSP00000231509,ENSP00000231656,ENSP00000232424,ENSP00000233638,ENSP00000239461,ENSP00000242462,ENSP00000244745,ENSP00000246657,ENSP00000249501,ENSP00000253968,ENSP00000257555,ENSP00000259915,ENSP00000262238,ENSP00000262965,ENSP00000263253,ENSP00000263334,ENSP00000265354,ENSP00000266304,ENSP00000283921,ENSP00000284000,ENSP00000295886…	ATF3,BAD,BARX1,BCL6,BPTF,BSX,CCR7,CDC5L,CDX1,CEBPA,CEBPB,CEBPD,CEBPG,CRX,DMRT1,DMRT2,DMRTA2,EP300,FOXD1,FOXI1,FOXJ1,FOXJ2,FOXK1,FOXP1,GABPA,GFI1,HDAC2,HES1,HEY1,HNF1A,HNF4A,HOXA10,HOXA5,HOXB4,HOXB9,HOXD10,IL6,JUN,LHX3,MAF,MEF2A,MYC,NEUROG3,NKX6-1,NR2F2,NR3C1,NR6A1,PAX4,PAX5,PAX6,PAX8,PBX1,PITX2,POU1F1,POU2F2,POU3F2,POU5F1,PRRX1,RAD21,REST,RREB1,RXRA,SERTAD2,SIX5,SOAT1,SOX4,SP1,SP4,SRF,TCF12,TCF3,…
GO:0048856	anatomical structure development	79	5085	1.22e-27	ENSP00000162391,ENSP00000221996,ENSP00000222726,ENSP00000231656,ENSP00000232424,ENSP00000233638,ENSP00000239461,ENSP00000242462,ENSP00000244745,ENSP00000246657,ENSP00000249501,ENSP00000253968,ENSP00000257555,ENSP00000259915,ENSP00000262238,ENSP00000262965,ENSP00000263253,ENSP00000263334,ENSP00000265354,ENSP00000266304,ENSP00000283921,ENSP00000284000,ENSP00000290295,ENSP00000295886,ENSP00000304169…	ATF3,BAD,BARX1,BCL6,BPTF,BSX,CCR7,CDX1,CEBPA,CEBPB,CEBPG,CRX,DBX1,DMRT1,DMRT2,DMRTA2,ENSG00000173575,EP300,FOXD1,FOXI1,FOXJ1,FOXJ2,FOXK1,FOXL1,FOXP1,GABPA,GFI1,GFI1B,HDAC2,HES1,HEY1,HNF1A,HOXA10,HOXA5,HOXA9,HOXB13,HOXB4,HOXB9,HOXD10,IL6,JUN,LHX3,MAF,MEF2A,MYC,NEUROG3,NKX6-1,NOBOX,NR2F2,PAX4,PAX5,PAX6,PAX8,PBX1,PITX2,POU1F1,POU2F2,POU3F2,POU3F4,POU5F1,POU6F1,PRRX1,PRRX2,REST,RREB1,RXRA,SIX5,SOX4,S…
GO:0044260	cellular macromolecule metabolic process	85	6413	1.37e-26	ENSP00000162391,ENSP00000221996,ENSP00000222584,ENSP00000222726,ENSP00000231509,ENSP00000231656,ENSP00000232424,ENSP00000233638,ENSP00000242462,ENSP00000244745,ENSP00000249501,ENSP00000253968,ENSP00000257555,ENSP00000259915,ENSP00000262238,ENSP00000262965,ENSP00000263253,ENSP00000263334,ENSP00000265354,ENSP00000266304,ENSP00000283921,ENSP00000284000,ENSP00000290295,ENSP00000295886,ENSP00000297338…	ATF3,BARX1,BCL6,BPTF,BSX,CDC5L,CDX1,CEBPA,CEBPB,CEBPD,CEBPG,CRX,DMRT1,DMRT2,ENSG00000173575,EP300,FOXD1,FOXI1,FOXJ1,FOXJ2,FOXK1,FOXL1,FOXP1,GABPA,GFI1,GFI1B,HDAC2,HES1,HEY1,HNF1A,HNF4A,HOXA10,HOXA5,HOXA9,HOXB13,HOXB4,HOXB9,HOXD10,IL6,JUN,LHX3,MAF,MEF2A,MYC,NEUROG3,NKX6-1,NOBOX,NR2F2,NR3C1,NR6A1,PAX4,PAX5,PAX6,PAX8,PBX1,PITX2,POU1F1,POU2F2,POU3F2,POU3F4,POU5F1,POU6F1,QRSL1,RAD21,REST,RREB1,RXRA,SE…
GO:0048869	cellular developmental process	67	3533	7.71e-26	ENSP00000162391,ENSP00000221996,ENSP00000222726,ENSP00000231656,ENSP00000232424,ENSP00000233638,ENSP00000239461,ENSP00000242462,ENSP00000244745,ENSP00000246657,ENSP00000249501,ENSP00000253968,ENSP00000257555,ENSP00000259915,ENSP00000262238,ENSP00000262965,ENSP00000263253,ENSP00000263334,ENSP00000265354,ENSP00000284000,ENSP00000290295,ENSP00000295886,ENSP00000304169,ENSP00000304286,ENSP00000305422…	ATF3,BARX1,BCL6,CCR7,CDC5L,CDX1,CEBPA,CEBPB,CEBPG,CRX,DBX1,DMRT1,DMRTA2,ENSG00000173575,EP300,FOXD1,FOXI1,FOXJ1,FOXJ2,FOXK1,FOXL1,FOXP1,GABPA,GFI1,HDAC2,HES1,HEY1,HNF1A,HOXA5,HOXB13,HOXB4,HOXD10,IL6,JUN,LHX3,MAF,MEF2A,NEUROG3,NKX6-1,NOBOX,NR2F2,PAX4,PAX5,PAX6,PAX8,PBX1,PITX2,POU1F1,POU2F2,POU3F2,POU3F4,POU5F1,PRRX1,REST,RXRA,SIX5,SOAT1,SOX4,SRF,TCF12,TCF3,TLX2,VDR,YY1,ZBTB16,ZBTB7A,ZEB1
GO:0010629	negative regulation of gene expression	50	1670	1.06e-25	ENSP00000231509,ENSP00000232424,ENSP00000239461,ENSP00000242462,ENSP00000259915,ENSP00000262238,ENSP00000262965,ENSP00000263253,ENSP00000265354,ENSP00000265990,ENSP00000290295,ENSP00000293805,ENSP00000295886,ENSP00000304169,ENSP00000305422,ENSP00000307208,ENSP00000311816,ENSP00000316842,ENSP00000323670,ENSP00000323880,ENSP00000327048,ENSP00000328720,ENSP00000328928,ENSP00000329170,ENSP00000338157…	ATF3,BCL6,BCL6B,BPTF,BTAF1,CEBPA,CEBPB,DMRT1,EP300,FOXD1,FOXJ1,FOXK1,FOXP1,GABPA,GFI1,GFI1B,HDAC2,HES1,HEY1,HOXB13,HOXB4,JUN,MAF,MEF2A,MYC,NEUROG3,NKX6-1,NR2F2,NR3C1,NR6A1,PAX4,PAX5,PAX6,PITX2,POU1F1,POU3F2,POU5F1,POU6F1,PRRX1,REST,RREB1,RXRA,SIX5,SRF,TCF3,VDR,YY1,ZBTB16,ZBTB7A,ZEB1
GO:0030154	cell differentiation	66	3457	1.97e-25	ENSP00000162391,ENSP00000221996,ENSP00000222726,ENSP00000231656,ENSP00000232424,ENSP00000233638,ENSP00000239461,ENSP00000242462,ENSP00000244745,ENSP00000246657,ENSP00000249501,ENSP00000253968,ENSP00000257555,ENSP00000259915,ENSP00000262238,ENSP00000262965,ENSP00000263253,ENSP00000263334,ENSP00000265354,ENSP00000284000,ENSP00000290295,ENSP00000295886,ENSP00000304169,ENSP00000304286,ENSP00000305422…	ATF3,BARX1,BCL6,CCR7,CDC5L,CDX1,CEBPA,CEBPB,CEBPG,CRX,DBX1,DMRT1,DMRTA2,ENSG00000173575,EP300,FOXD1,FOXI1,FOXJ1,FOXJ2,FOXK1,FOXL1,FOXP1,GABPA,GFI1,HDAC2,HES1,HEY1,HNF1A,HOXA5,HOXB13,HOXB4,HOXD10,IL6,JUN,LHX3,MAF,MEF2A,NEUROG3,NKX6-1,NOBOX,NR2F2,PAX4,PAX5,PAX6,PAX8,PBX1,PITX2,POU1F1,POU2F2,POU3F2,POU3F4,POU5F1,PRRX1,REST,RXRA,SIX5,SOAT1,SOX4,SRF,TCF12,TCF3,TLX2,YY1,ZBTB16,ZBTB7A,ZEB1
GO:0032501	multicellular organismal process	83	6507	5.41e-24	ENSP00000221996,ENSP00000222726,ENSP00000231656,ENSP00000232424,ENSP00000233638,ENSP00000239461,ENSP00000242462,ENSP00000244745,ENSP00000246657,ENSP00000249501,ENSP00000253968,ENSP00000257555,ENSP00000259915,ENSP00000262238,ENSP00000262965,ENSP00000263253,ENSP00000263334,ENSP00000265354,ENSP00000266304,ENSP00000283921,ENSP00000284000,ENSP00000290295,ENSP00000295886,ENSP00000304169,ENSP00000304286…	ATF3,BAD,BARX1,BCL6,BPTF,BSX,CCR7,CDX1,CEBPA,CEBPB,CEBPG,CRX,DBX1,DMRT1,DMRT2,DMRTA2,ENSG00000173575,EP300,FOXD1,FOXI1,FOXJ1,FOXK1,FOXL1,FOXP1,GABPA,GFI1,GFI1B,HDAC2,HES1,HEY1,HNF1A,HNF4A,HOXA10,HOXA5,HOXA9,HOXB13,HOXB4,HOXB9,HOXD10,IL6,JUN,LHX3,MAF,MEF2A,MYC,NEUROG3,NKX6-1,NOBOX,NR2F2,NR6A1,PAX4,PAX5,PAX6,PAX8,PBX1,PITX2,POU1F1,POU2F2,POU3F2,POU3F4,POU5F1,POU6F1,PRRX1,PRRX2,REST,RREB1,RXRA,SIX5,…
GO:0048731	system development	69	4144	1.28e-23	ENSP00000221996,ENSP00000222726,ENSP00000231656,ENSP00000232424,ENSP00000233638,ENSP00000239461,ENSP00000242462,ENSP00000244745,ENSP00000246657,ENSP00000249501,ENSP00000253968,ENSP00000257555,ENSP00000259915,ENSP00000262238,ENSP00000262965,ENSP00000263253,ENSP00000263334,ENSP00000265354,ENSP00000283921,ENSP00000284000,ENSP00000290295,ENSP00000295886,ENSP00000304169,ENSP00000304286,ENSP00000305422…	ATF3,BAD,BARX1,BCL6,BPTF,BSX,CCR7,CDX1,CEBPA,CEBPB,CEBPG,CRX,DBX1,DMRT1,DMRT2,DMRTA2,ENSG00000173575,EP300,FOXD1,FOXI1,FOXJ1,FOXK1,FOXL1,FOXP1,GFI1,HDAC2,HES1,HEY1,HNF1A,HOXA10,HOXA5,HOXB13,HOXB4,HOXB9,HOXD10,IL6,JUN,LHX3,MAF,MEF2A,MYC,NEUROG3,NKX6-1,NR2F2,PAX4,PAX5,PAX6,PAX8,PBX1,PITX2,POU1F1,POU2F2,POU3F2,POU3F4,POU5F1,POU6F1,PRRX1,REST,RXRA,SIX5,SOX4,SRF,TCF12,TCF3,TLX2,VDR,YY1,ZBTB16,ZEB1
GO:0043170	macromolecule metabolic process	86	7453	1.33e-22	ENSP00000162391,ENSP00000221996,ENSP00000222584,ENSP00000222726,ENSP00000231509,ENSP00000231656,ENSP00000232424,ENSP00000233638,ENSP00000242462,ENSP00000244745,ENSP00000249501,ENSP00000253968,ENSP00000257555,ENSP00000259915,ENSP00000262238,ENSP00000262965,ENSP00000263253,ENSP00000263334,ENSP00000265354,ENSP00000266304,ENSP00000283921,ENSP00000284000,ENSP00000290295,ENSP00000295886,ENSP00000297338…	ATF3,BAD,BARX1,BCL6,BPTF,BSX,CDC5L,CDX1,CEBPA,CEBPB,CEBPD,CEBPG,CRX,DMRT1,DMRT2,ENSG00000173575,EP300,FOXD1,FOXI1,FOXJ1,FOXJ2,FOXK1,FOXL1,FOXP1,GABPA,GFI1,GFI1B,HDAC2,HES1,HEY1,HNF1A,HNF4A,HOXA10,HOXA5,HOXA9,HOXB13,HOXB4,HOXB9,HOXD10,IL6,JUN,LHX3,MAF,MEF2A,MYC,NEUROG3,NKX6-1,NOBOX,NR2F2,NR3C1,NR6A1,PAX4,PAX5,PAX6,PAX8,PBX1,PITX2,POU1F1,POU2F2,POU3F2,POU3F4,POU5F1,POU6F1,QRSL1,RAD21,REST,RREB1,RXR…
GO:0050794	regulation of cellular process	96	10484	4.96e-22	ENSP00000162391,ENSP00000221996,ENSP00000222584,ENSP00000222726,ENSP00000231509,ENSP00000231656,ENSP00000232424,ENSP00000233638,ENSP00000239461,ENSP00000242462,ENSP00000244745,ENSP00000246657,ENSP00000249501,ENSP00000253968,ENSP00000257555,ENSP00000259915,ENSP00000262238,ENSP00000262305,ENSP00000262965,ENSP00000263253,ENSP00000263334,ENSP00000265354,ENSP00000265990,ENSP00000266304,ENSP00000283921…	ATF3,BAD,BARX1,BCL6,BCL6B,BPTF,BSX,BTAF1,CCR7,CDC5L,CDX1,CEBPA,CEBPB,CEBPD,CEBPG,CRX,DBX1,DBX2,DMRT1,DMRT2,DMRTA2,ENSG00000173575,EP300,FOXD1,FOXI1,FOXJ1,FOXJ2,FOXK1,FOXL1,FOXP1,GABPA,GFI1,GFI1B,HDAC2,HES1,HEY1,HNF1A,HNF4A,HOXA10,HOXA5,HOXA9,HOXB13,HOXB4,HOXB9,HOXD10,IL6,IRX6,JUN,LHX3,MAF,MEF2A,MYC,NEUROG3,NKX6-1,NOBOX,NR2F2,NR3C1,NR6A1,PAX4,PAX5,PAX6,PAX8,PBX1,PITX2,POU1F1,POU2F2,POU3F2,POU3F4,P…
GO:0051172	negative regulation of nitrogen compound metabolic process	52	2307	2.34e-21	ENSP00000231509,ENSP00000232424,ENSP00000239461,ENSP00000242462,ENSP00000244745,ENSP00000259915,ENSP00000262238,ENSP00000262965,ENSP00000263253,ENSP00000265354,ENSP00000265990,ENSP00000290295,ENSP00000293805,ENSP00000295886,ENSP00000304169,ENSP00000305422,ENSP00000307208,ENSP00000311816,ENSP00000316842,ENSP00000323670,ENSP00000323880,ENSP00000327048,ENSP00000328720,ENSP00000328928,ENSP00000338157…	ATF3,BCL6,BCL6B,BPTF,BTAF1,CEBPA,CEBPB,DMRT1,EP300,FOXD1,FOXJ1,FOXK1,FOXP1,GABPA,GFI1,GFI1B,HDAC2,HES1,HEY1,HOXB13,HOXB4,IL6,JUN,MAF,MEF2A,MYC,NEUROG3,NKX6-1,NR2F2,NR3C1,NR6A1,PAX4,PAX5,PAX6,PITX2,POU1F1,POU5F1,POU6F1,PRRX1,REST,RREB1,RXRA,SIX5,SOX4,SRF,TCF3,USP7,VDR,YY1,ZBTB16,ZBTB7A,ZEB1
GO:0048523	negative regulation of cellular process	68	4454	7.39e-21	ENSP00000162391,ENSP00000222726,ENSP00000231509,ENSP00000232424,ENSP00000233638,ENSP00000239461,ENSP00000242462,ENSP00000244745,ENSP00000246657,ENSP00000253968,ENSP00000259915,ENSP00000262238,ENSP00000262305,ENSP00000262965,ENSP00000263253,ENSP00000263334,ENSP00000265354,ENSP00000265990,ENSP00000290295,ENSP00000293805,ENSP00000295886,ENSP00000297338,ENSP00000304169,ENSP00000305422,ENSP00000307208…	ATF3,BAD,BARX1,BCL6,BCL6B,BPTF,BTAF1,CCR7,CDC5L,CEBPA,CEBPB,DMRT1,EP300,FOXD1,FOXJ1,FOXJ2,FOXK1,FOXP1,GABPA,GFI1,GFI1B,HDAC2,HES1,HEY1,HNF4A,HOXA5,HOXA9,HOXB13,HOXB4,IL6,JUN,LHX3,MAF,MEF2A,MYC,NEUROG3,NKX6-1,NR2F2,NR3C1,NR6A1,PAX4,PAX5,PAX6,PAX8,PBX1,PITX2,POU1F1,POU3F4,POU5F1,POU6F1,PRRX1,RAB11FIP3,RAD21,REST,RREB1,RXRA,SERTAD2,SIX5,SOX4,SRF,TCF3,TLX2,USP7,VDR,YY1,ZBTB16,ZBTB7A,ZEB1
GO:0048519	negative regulation of biological process	71	4953	9.92e-21	ENSP00000162391,ENSP00000222726,ENSP00000231509,ENSP00000232424,ENSP00000233638,ENSP00000239461,ENSP00000242462,ENSP00000244745,ENSP00000246657,ENSP00000253968,ENSP00000259915,ENSP00000262238,ENSP00000262305,ENSP00000262965,ENSP00000263253,ENSP00000263334,ENSP00000265354,ENSP00000265990,ENSP00000284000,ENSP00000290295,ENSP00000293805,ENSP00000295886,ENSP00000297338,ENSP00000304169,ENSP00000305422…	ATF3,BAD,BARX1,BCL6,BCL6B,BPTF,BTAF1,CCR7,CDC5L,CEBPA,CEBPB,CEBPG,DMRT1,EP300,FOXD1,FOXJ1,FOXJ2,FOXK1,FOXP1,GABPA,GFI1,GFI1B,HDAC2,HES1,HEY1,HNF4A,HOXA5,HOXA9,HOXB13,HOXB4,IL6,JUN,LHX3,MAF,MEF2A,MYC,NEUROG3,NKX6-1,NR2F2,NR3C1,NR6A1,PAX4,PAX5,PAX6,PAX8,PBX1,PITX2,POU1F1,POU3F2,POU3F4,POU5F1,POU6F1,PRRX1,RAB11FIP3,RAD21,REST,RREB1,RXRA,SERTAD2,SIX5,SOX4,SRF,TCF3,TLX2,TRIM63,USP7,VDR,YY1,ZBTB16,ZBTB…
GO:0010605	negative regulation of macromolecule metabolic process	53	2558	3.13e-20	ENSP00000231509,ENSP00000232424,ENSP00000239461,ENSP00000242462,ENSP00000244745,ENSP00000259915,ENSP00000262238,ENSP00000262965,ENSP00000263253,ENSP00000265354,ENSP00000265990,ENSP00000290295,ENSP00000293805,ENSP00000295886,ENSP00000304169,ENSP00000305422,ENSP00000307208,ENSP00000311816,ENSP00000316842,ENSP00000323670,ENSP00000323880,ENSP00000327048,ENSP00000328720,ENSP00000328928,ENSP00000329170…	ATF3,BCL6,BCL6B,BPTF,BTAF1,CEBPA,CEBPB,DMRT1,EP300,FOXD1,FOXJ1,FOXK1,FOXP1,GABPA,GFI1,GFI1B,HDAC2,HES1,HEY1,HOXB13,HOXB4,IL6,JUN,MAF,MEF2A,MYC,NEUROG3,NKX6-1,NR2F2,NR3C1,NR6A1,PAX4,PAX5,PAX6,PITX2,POU1F1,POU3F2,POU5F1,POU6F1,PRRX1,REST,RREB1,RXRA,SIX5,SOX4,SRF,TCF3,USP7,VDR,YY1,ZBTB16,ZBTB7A,ZEB1
GO:0031324	negative regulation of cellular metabolic process	52	2463	4.29e-20	ENSP00000231509,ENSP00000232424,ENSP00000239461,ENSP00000242462,ENSP00000244745,ENSP00000259915,ENSP00000262238,ENSP00000262965,ENSP00000263253,ENSP00000265354,ENSP00000265990,ENSP00000290295,ENSP00000293805,ENSP00000295886,ENSP00000304169,ENSP00000305422,ENSP00000307208,ENSP00000311816,ENSP00000316842,ENSP00000323670,ENSP00000323880,ENSP00000327048,ENSP00000328720,ENSP00000328928,ENSP00000338157…	ATF3,BCL6,BCL6B,BPTF,BTAF1,CEBPA,CEBPB,DMRT1,EP300,FOXD1,FOXJ1,FOXK1,FOXP1,GABPA,GFI1,GFI1B,HDAC2,HES1,HEY1,HOXB13,HOXB4,IL6,JUN,MAF,MEF2A,MYC,NEUROG3,NKX6-1,NR2F2,NR3C1,NR6A1,PAX4,PAX5,PAX6,PITX2,POU1F1,POU5F1,POU6F1,PRRX1,REST,RREB1,RXRA,SIX5,SOX4,SRF,TCF3,USP7,VDR,YY1,ZBTB16,ZBTB7A,ZEB1
GO:0006807	nitrogen compound metabolic process	87	8349	8.31e-20	ENSP00000162391,ENSP00000221996,ENSP00000222584,ENSP00000222726,ENSP00000231509,ENSP00000231656,ENSP00000232424,ENSP00000233638,ENSP00000242462,ENSP00000244745,ENSP00000249501,ENSP00000253968,ENSP00000257555,ENSP00000259915,ENSP00000262238,ENSP00000262965,ENSP00000263253,ENSP00000263334,ENSP00000265354,ENSP00000266304,ENSP00000283921,ENSP00000284000,ENSP00000290295,ENSP00000295886,ENSP00000297338…	ACOT7,ATF3,BAD,BARX1,BCL6,BPTF,BSX,CDC5L,CDX1,CEBPA,CEBPB,CEBPD,CEBPG,CRX,DMRT1,DMRT2,ENSG00000173575,EP300,FOXD1,FOXI1,FOXJ1,FOXJ2,FOXK1,FOXL1,FOXP1,GABPA,GFI1,GFI1B,HDAC2,HES1,HEY1,HNF1A,HNF4A,HOXA10,HOXA5,HOXA9,HOXB13,HOXB4,HOXB9,HOXD10,IL6,JUN,LHX3,MAF,MEF2A,MYC,NEUROG3,NKX6-1,NOBOX,NR2F2,NR3C1,NR6A1,PAX4,PAX5,PAX6,PAX8,PBX1,PITX2,POU1F1,POU2F2,POU3F2,POU3F4,POU5F1,POU6F1,QRSL1,RAD21,REST,RRE…
GO:0003002	regionalization	24	313	9.74e-20	ENSP00000222726,ENSP00000231656,ENSP00000232424,ENSP00000249501,ENSP00000253968,ENSP00000262238,ENSP00000263253,ENSP00000263334,ENSP00000265354,ENSP00000283921,ENSP00000295886,ENSP00000304169,ENSP00000307208,ENSP00000309439,ENSP00000323880,ENSP00000328928,ENSP00000338157,ENSP00000360811,ENSP00000377721,ENSP00000383909,ENSP00000404100,ENSP00000405890,ENSP00000436881,ENSP00000481581	BARX1,BPTF,CDX1,DBX1,DMRTA2,EP300,FOXD1,FOXJ1,HES1,HOXA10,HOXA5,HOXB4,HOXB9,HOXD10,LHX3,NKX6-1,NR2F2,PAX6,PAX8,PBX1,PITX2,SRF,YY1,ZBTB16
GO:0044237	cellular metabolic process	88	8797	4.86e-19	ENSP00000162391,ENSP00000221996,ENSP00000222584,ENSP00000222726,ENSP00000231509,ENSP00000231656,ENSP00000232424,ENSP00000233638,ENSP00000242462,ENSP00000244745,ENSP00000249501,ENSP00000253968,ENSP00000257555,ENSP00000259915,ENSP00000262238,ENSP00000262965,ENSP00000263253,ENSP00000263334,ENSP00000265354,ENSP00000266304,ENSP00000283921,ENSP00000284000,ENSP00000290295,ENSP00000295886,ENSP00000297338…	ACOT7,ATF3,BAD,BARX1,BCL6,BPTF,BSX,CDC5L,CDX1,CEBPA,CEBPB,CEBPD,CEBPG,CRX,DMRT1,DMRT2,ENSG00000173575,EP300,FOXD1,FOXI1,FOXJ1,FOXJ2,FOXK1,FOXL1,FOXP1,GABPA,GFI1,GFI1B,HDAC2,HES1,HEY1,HNF1A,HNF4A,HOXA10,HOXA5,HOXA9,HOXB13,HOXB4,HOXB9,HOXD10,IL6,JUN,LHX3,MAF,MEF2A,MYC,NEUROG3,NKX6-1,NOBOX,NR2F2,NR3C1,NR6A1,PAX4,PAX5,PAX6,PAX8,PBX1,PITX2,POU1F1,POU2F2,POU3F2,POU3F4,POU5F1,POU6F1,QRSL1,RAD21,REST,RRE…
GO:0065007	biological regulation	97	11740	5.01e-19	ENSP00000162391,ENSP00000221996,ENSP00000222584,ENSP00000222726,ENSP00000231509,ENSP00000231656,ENSP00000232424,ENSP00000233638,ENSP00000239461,ENSP00000242462,ENSP00000244745,ENSP00000246657,ENSP00000249501,ENSP00000253968,ENSP00000257555,ENSP00000259915,ENSP00000262238,ENSP00000262305,ENSP00000262965,ENSP00000263253,ENSP00000263334,ENSP00000265354,ENSP00000265990,ENSP00000266304,ENSP00000283921…	ATF3,BAD,BARX1,BCL6,BCL6B,BPTF,BSX,BTAF1,CCR7,CDC5L,CDX1,CEBPA,CEBPB,CEBPD,CEBPG,CRX,DBX1,DBX2,DMRT1,DMRT2,DMRTA2,ENSG00000173575,EP300,FOXD1,FOXI1,FOXJ1,FOXJ2,FOXK1,FOXL1,FOXP1,GABPA,GFI1,GFI1B,HDAC2,HES1,HEY1,HNF1A,HNF4A,HOXA10,HOXA5,HOXA9,HOXB13,HOXB4,HOXB9,HOXD10,IL6,IRX6,JUN,LHX3,MAF,MEF2A,MYC,NEUROG3,NKX6-1,NOBOX,NR2F2,NR3C1,NR6A1,PAX4,PAX5,PAX6,PAX8,PBX1,PITX2,POU1F1,POU2F2,POU3F2,POU3F4,P…
GO:0044238	primary metabolic process	88	8808	5.24e-19	ENSP00000162391,ENSP00000221996,ENSP00000222584,ENSP00000222726,ENSP00000231509,ENSP00000231656,ENSP00000232424,ENSP00000233638,ENSP00000242462,ENSP00000244745,ENSP00000249501,ENSP00000253968,ENSP00000257555,ENSP00000259915,ENSP00000262238,ENSP00000262965,ENSP00000263253,ENSP00000263334,ENSP00000265354,ENSP00000266304,ENSP00000283921,ENSP00000284000,ENSP00000290295,ENSP00000295886,ENSP00000297338…	ACOT7,ATF3,BAD,BARX1,BCL6,BPTF,BSX,CDC5L,CDX1,CEBPA,CEBPB,CEBPD,CEBPG,CRX,DMRT1,DMRT2,ENSG00000173575,EP300,FOXD1,FOXI1,FOXJ1,FOXJ2,FOXK1,FOXL1,FOXP1,GABPA,GFI1,GFI1B,HDAC2,HES1,HEY1,HNF1A,HNF4A,HOXA10,HOXA5,HOXA9,HOXB13,HOXB4,HOXB9,HOXD10,IL6,JUN,LHX3,MAF,MEF2A,MYC,NEUROG3,NKX6-1,NOBOX,NR2F2,NR3C1,NR6A1,PAX4,PAX5,PAX6,PAX8,PBX1,PITX2,POU1F1,POU2F2,POU3F2,POU3F4,POU5F1,POU6F1,QRSL1,RAD21,REST,RRE…
GO:0009887	animal organ morphogenesis	33	865	8.82e-19	ENSP00000221996,ENSP00000222726,ENSP00000231656,ENSP00000232424,ENSP00000239461,ENSP00000244745,ENSP00000249501,ENSP00000262238,ENSP00000263253,ENSP00000263334,ENSP00000265354,ENSP00000290295,ENSP00000295886,ENSP00000304169,ENSP00000304286,ENSP00000305422,ENSP00000323880,ENSP00000328928,ENSP00000338272,ENSP00000339906,ENSP00000344285,ENSP00000350844,ENSP00000354487,ENSP00000360266,ENSP00000360811…	BSX,CDX1,CEBPB,CRX,EP300,FOXD1,FOXI1,FOXJ1,HDAC2,HES1,HEY1,HOXA5,HOXB13,HOXB4,HOXD10,JUN,LHX3,MYC,NKX6-1,PAX4,PAX5,PAX6,PAX8,PBX1,PITX2,POU3F4,PRRX1,RXRA,SOX4,SRF,VDR,YY1,ZEB1
GO:0050793	regulation of developmental process	50	2416	9.36e-19	ENSP00000162391,ENSP00000221996,ENSP00000222726,ENSP00000231656,ENSP00000232424,ENSP00000233638,ENSP00000239461,ENSP00000242462,ENSP00000259915,ENSP00000262965,ENSP00000263253,ENSP00000263334,ENSP00000265354,ENSP00000293805,ENSP00000295886,ENSP00000305422,ENSP00000311816,ENSP00000312987,ENSP00000323880,ENSP00000327048,ENSP00000328928,ENSP00000329170,ENSP00000329357,ENSP00000338157,ENSP00000338272…	BAD,BCL6,BCL6B,CDX1,CEBPA,CEBPB,CRX,DMRT1,DMRT2,DMRTA2,EP300,FOXD1,FOXJ1,FOXJ2,FOXP1,GABPA,GFI1,HDAC2,HES1,HEY1,HNF4A,HOXA5,HOXA9,HOXB4,IL6,JUN,MAF,MEF2A,MYC,NEUROG3,NKX6-1,PAX4,PAX6,PAX8,PBX1,POU1F1,POU3F2,POU5F1,PRRX1,REST,RREB1,RXRA,SP1,SRF,TCF12,TCF3,TLX2,VDR,ZBTB16,ZEB1
GO:0051239	regulation of multicellular organismal process	53	2788	1.39e-18	ENSP00000162391,ENSP00000221996,ENSP00000222726,ENSP00000231656,ENSP00000232424,ENSP00000233638,ENSP00000239461,ENSP00000242462,ENSP00000246657,ENSP00000259915,ENSP00000262238,ENSP00000262305,ENSP00000262965,ENSP00000263253,ENSP00000263334,ENSP00000265354,ENSP00000284000,ENSP00000295886,ENSP00000305422,ENSP00000311816,ENSP00000312987,ENSP00000323880,ENSP00000327048,ENSP00000329170,ENSP00000329357…	BAD,BCL6,CCR7,CDX1,CEBPA,CEBPB,CEBPG,CRX,DMRT1,DMRT2,DMRTA2,EP300,FOXD1,FOXJ1,FOXJ2,FOXP1,GABPA,GFI1,HDAC2,HES1,HEY1,HNF4A,HOXA5,HOXA9,IL6,JUN,MAF,MEF2A,MYC,NEUROG3,NKX6-1,NR2F2,PAX6,PAX8,PBX1,POU1F1,POU3F2,POU5F1,PRRX1,RAB11FIP3,REST,RREB1,RXRA,SP1,SRF,TCF12,TCF3,TLX2,TRIM63,VDR,YY1,ZBTB16,ZEB1
GO:0007389	pattern specification process	25	409	2.04e-18	ENSP00000222726,ENSP00000231656,ENSP00000232424,ENSP00000249501,ENSP00000253968,ENSP00000262238,ENSP00000263253,ENSP00000263334,ENSP00000265354,ENSP00000283921,ENSP00000295886,ENSP00000304169,ENSP00000307208,ENSP00000309439,ENSP00000323880,ENSP00000328928,ENSP00000338157,ENSP00000354487,ENSP00000360811,ENSP00000377721,ENSP00000383909,ENSP00000404100,ENSP00000405890,ENSP00000436881,ENSP00000481581	BARX1,BPTF,CDX1,DBX1,DMRTA2,EP300,FOXD1,FOXJ1,HES1,HOXA10,HOXA5,HOXB4,HOXB9,HOXD10,LHX3,NKX6-1,NR2F2,PAX6,PAX8,PBX1,PITX2,SRF,YY1,ZBTB16,ZEB1
GO:2000026	regulation of multicellular organismal development	44	1876	5.62e-18	ENSP00000162391,ENSP00000221996,ENSP00000222726,ENSP00000231656,ENSP00000232424,ENSP00000233638,ENSP00000239461,ENSP00000242462,ENSP00000259915,ENSP00000262965,ENSP00000263253,ENSP00000263334,ENSP00000265354,ENSP00000295886,ENSP00000305422,ENSP00000311816,ENSP00000312987,ENSP00000323880,ENSP00000327048,ENSP00000329170,ENSP00000329357,ENSP00000338157,ENSP00000338272,ENSP00000343619,ENSP00000346886…	BAD,BCL6,CDX1,CEBPB,CRX,DMRT1,DMRT2,DMRTA2,EP300,FOXD1,FOXJ1,FOXJ2,FOXP1,GABPA,GFI1,HDAC2,HES1,HEY1,HNF4A,HOXA5,HOXA9,IL6,JUN,MAF,MYC,NEUROG3,NKX6-1,PAX6,PAX8,PBX1,POU3F2,POU5F1,PRRX1,REST,RREB1,RXRA,SP1,SRF,TCF12,TCF3,TLX2,VDR,ZBTB16,ZEB1
GO:0045595	regulation of cell differentiation	42	1695	7.63e-18	ENSP00000162391,ENSP00000221996,ENSP00000222726,ENSP00000232424,ENSP00000233638,ENSP00000239461,ENSP00000242462,ENSP00000259915,ENSP00000262965,ENSP00000263253,ENSP00000263334,ENSP00000265354,ENSP00000293805,ENSP00000295886,ENSP00000305422,ENSP00000311816,ENSP00000323880,ENSP00000327048,ENSP00000328928,ENSP00000329170,ENSP00000338157,ENSP00000338272,ENSP00000339906,ENSP00000343619,ENSP00000346389…	BAD,BCL6,BCL6B,CEBPA,CEBPB,CRX,DMRTA2,EP300,FOXJ1,FOXJ2,FOXP1,GABPA,GFI1,HDAC2,HES1,HEY1,HOXA5,HOXA9,HOXB4,IL6,JUN,MAF,MEF2A,MYC,NEUROG3,NKX6-1,PAX4,PAX6,PAX8,PBX1,POU3F2,POU5F1,PRRX1,REST,RREB1,SRF,TCF12,TCF3,TLX2,VDR,ZBTB16,ZEB1
GO:0071704	organic substance metabolic process	88	9135	8.64e-18	ENSP00000162391,ENSP00000221996,ENSP00000222584,ENSP00000222726,ENSP00000231509,ENSP00000231656,ENSP00000232424,ENSP00000233638,ENSP00000242462,ENSP00000244745,ENSP00000249501,ENSP00000253968,ENSP00000257555,ENSP00000259915,ENSP00000262238,ENSP00000262965,ENSP00000263253,ENSP00000263334,ENSP00000265354,ENSP00000266304,ENSP00000283921,ENSP00000284000,ENSP00000290295,ENSP00000295886,ENSP00000297338…	ACOT7,ATF3,BAD,BARX1,BCL6,BPTF,BSX,CDC5L,CDX1,CEBPA,CEBPB,CEBPD,CEBPG,CRX,DMRT1,DMRT2,ENSG00000173575,EP300,FOXD1,FOXI1,FOXJ1,FOXJ2,FOXK1,FOXL1,FOXP1,GABPA,GFI1,GFI1B,HDAC2,HES1,HEY1,HNF1A,HNF4A,HOXA10,HOXA5,HOXA9,HOXB13,HOXB4,HOXB9,HOXD10,IL6,JUN,LHX3,MAF,MEF2A,MYC,NEUROG3,NKX6-1,NOBOX,NR2F2,NR3C1,NR6A1,PAX4,PAX5,PAX6,PAX8,PBX1,PITX2,POU1F1,POU2F2,POU3F2,POU3F4,POU5F1,POU6F1,QRSL1,RAD21,REST,RRE…
GO:0009653	anatomical structure morphogenesis	44	1992	5.25e-17	ENSP00000162391,ENSP00000221996,ENSP00000222726,ENSP00000231656,ENSP00000232424,ENSP00000233638,ENSP00000239461,ENSP00000244745,ENSP00000249501,ENSP00000259915,ENSP00000262238,ENSP00000263253,ENSP00000263334,ENSP00000265354,ENSP00000283921,ENSP00000290295,ENSP00000295886,ENSP00000304169,ENSP00000304286,ENSP00000305422,ENSP00000323880,ENSP00000326272,ENSP00000328720,ENSP00000328928,ENSP00000338157…	BCL6,BSX,CDX1,CEBPB,CRX,DMRT1,EP300,FOXD1,FOXI1,FOXJ1,FOXJ2,FOXK1,FOXL1,HDAC2,HES1,HEY1,HOXA10,HOXA5,HOXB13,HOXB4,HOXD10,JUN,LHX3,MEF2A,MYC,NKX6-1,NR2F2,PAX4,PAX5,PAX6,PAX8,PBX1,PITX2,POU3F4,POU5F1,PRRX1,RXRA,SOX4,SRF,TLX2,VDR,YY1,ZBTB16,ZEB1
GO:0009888	tissue development	39	1626	7.28e-16	ENSP00000222726,ENSP00000232424,ENSP00000233638,ENSP00000239461,ENSP00000242462,ENSP00000244745,ENSP00000249501,ENSP00000253968,ENSP00000259915,ENSP00000263253,ENSP00000263334,ENSP00000265354,ENSP00000290295,ENSP00000295886,ENSP00000304169,ENSP00000305422,ENSP00000307208,ENSP00000323880,ENSP00000326272,ENSP00000327048,ENSP00000328928,ENSP00000329170,ENSP00000338157,ENSP00000338272,ENSP00000344352…	ATF3,BARX1,BPTF,CEBPB,DMRT1,DMRTA2,EP300,FOXD1,FOXJ1,FOXL1,HDAC2,HES1,HEY1,HOXA5,HOXB13,HOXB4,HOXD10,JUN,MAF,MEF2A,MYC,NEUROG3,NKX6-1,NR2F2,PAX5,PAX6,PAX8,PBX1,PITX2,POU3F2,POU5F1,PRRX1,RXRA,SOX4,SRF,TLX2,VDR,ZBTB16,ZEB1
GO:0009790	embryo development	30	890	1.68e-15	ENSP00000222726,ENSP00000232424,ENSP00000233638,ENSP00000239461,ENSP00000244745,ENSP00000249501,ENSP00000259915,ENSP00000263253,ENSP00000263334,ENSP00000265354,ENSP00000283921,ENSP00000304169,ENSP00000304286,ENSP00000305422,ENSP00000307208,ENSP00000309439,ENSP00000328928,ENSP00000338157,ENSP00000338272,ENSP00000346886,ENSP00000350844,ENSP00000354487,ENSP00000362296,ENSP00000371686,ENSP00000377721…	BPTF,CEBPA,CEBPB,DMRT2,EP300,FOXI1,GABPA,HDAC2,HES1,HEY1,HOXA10,HOXA5,HOXB4,HOXB9,HOXD10,NR2F2,PAX5,PAX6,PAX8,PBX1,PITX2,POU3F4,POU5F1,PRRX1,RXRA,SOX4,SRF,TLX2,ZBTB16,ZEB1
GO:0035270	endocrine system development	15	120	5.51e-15	ENSP00000222726,ENSP00000232424,ENSP00000242462,ENSP00000244745,ENSP00000263334,ENSP00000265354,ENSP00000295886,ENSP00000304169,ENSP00000329170,ENSP00000339906,ENSP00000342931,ENSP00000360811,ENSP00000385675,ENSP00000404100,ENSP00000405890	HES1,HOXA5,IL6,LHX3,NEUROG3,NKX6-1,PAX4,PAX6,PAX8,PBX1,PITX2,POU1F1,POU3F2,SOX4,SRF
GO:0051094	positive regulation of developmental process	34	1286	9.89e-15	ENSP00000221996,ENSP00000222726,ENSP00000232424,ENSP00000242462,ENSP00000259915,ENSP00000262965,ENSP00000263334,ENSP00000265354,ENSP00000295886,ENSP00000305422,ENSP00000323880,ENSP00000328928,ENSP00000329170,ENSP00000329357,ENSP00000338157,ENSP00000339906,ENSP00000342931,ENSP00000346389,ENSP00000354487,ENSP00000360266,ENSP00000369270,ENSP00000371686,ENSP00000371711,ENSP00000378040,ENSP00000383909…	BAD,BCL6,CEBPA,CEBPB,CRX,DMRT1,DMRT2,DMRTA2,FOXD1,FOXJ1,HDAC2,HES1,HOXA5,HOXB4,IL6,JUN,MEF2A,MYC,NEUROG3,NKX6-1,PAX4,PAX6,PAX8,POU1F1,POU3F2,POU5F1,RREB1,SP1,SRF,TCF12,TCF3,VDR,ZBTB16,ZEB1
GO:0002520	immune system development	25	601	1.07e-14	ENSP00000232424,ENSP00000244745,ENSP00000246657,ENSP00000253968,ENSP00000257555,ENSP00000262965,ENSP00000263253,ENSP00000265354,ENSP00000284000,ENSP00000304169,ENSP00000311816,ENSP00000323880,ENSP00000326272,ENSP00000328928,ENSP00000338157,ENSP00000342931,ENSP00000359357,ENSP00000360266,ENSP00000377747,ENSP00000384371,ENSP00000385675,ENSP00000405890,ENSP00000427514,ENSP00000431603,ENSP00000484803	BARX1,BCL6,CCR7,CEBPA,CEBPG,ENSG00000173575,EP300,FOXJ1,FOXL1,FOXP1,GFI1,HES1,HNF1A,HOXB4,IL6,JUN,PBX1,PITX2,POU1F1,POU2F2,REST,SOX4,SRF,TCF3,ZBTB16
GO:0009792	embryo development ending in birth or egg hatching	24	568	3.29e-14	ENSP00000222726,ENSP00000232424,ENSP00000239461,ENSP00000244745,ENSP00000249501,ENSP00000259915,ENSP00000263253,ENSP00000265354,ENSP00000304169,ENSP00000304286,ENSP00000305422,ENSP00000307208,ENSP00000309439,ENSP00000328928,ENSP00000338272,ENSP00000346886,ENSP00000350844,ENSP00000354487,ENSP00000371686,ENSP00000377721,ENSP00000404100,ENSP00000405890,ENSP00000419692,ENSP00000427514	BPTF,CEBPA,CEBPB,DMRT2,EP300,FOXI1,GABPA,HES1,HEY1,HOXA5,HOXB4,HOXB9,HOXD10,NR2F2,PAX5,PAX6,PBX1,PITX2,POU5F1,PRRX1,RXRA,SOX4,SRF,ZEB1
GO:0048534	hematopoietic or lymphoid organ development	24	573	3.93e-14	ENSP00000232424,ENSP00000244745,ENSP00000246657,ENSP00000253968,ENSP00000257555,ENSP00000262965,ENSP00000263253,ENSP00000265354,ENSP00000284000,ENSP00000304169,ENSP00000311816,ENSP00000326272,ENSP00000328928,ENSP00000338157,ENSP00000342931,ENSP00000359357,ENSP00000360266,ENSP00000377747,ENSP00000384371,ENSP00000385675,ENSP00000405890,ENSP00000427514,ENSP00000431603,ENSP00000484803	BARX1,BCL6,CCR7,CEBPA,CEBPG,ENSG00000173575,EP300,FOXL1,FOXP1,GFI1,HES1,HNF1A,HOXB4,IL6,JUN,PBX1,PITX2,POU1F1,POU2F2,REST,SOX4,SRF,TCF3,ZBTB16
GO:0051240	positive regulation of multicellular organismal process	36	1551	5.07e-14	ENSP00000221996,ENSP00000222726,ENSP00000232424,ENSP00000242462,ENSP00000246657,ENSP00000259915,ENSP00000262965,ENSP00000263253,ENSP00000263334,ENSP00000265354,ENSP00000284000,ENSP00000295886,ENSP00000305422,ENSP00000323880,ENSP00000329170,ENSP00000329357,ENSP00000338157,ENSP00000342931,ENSP00000346389,ENSP00000354487,ENSP00000360266,ENSP00000369270,ENSP00000371686,ENSP00000371711,ENSP00000378040…	BAD,BCL6,CCR7,CEBPA,CEBPB,CEBPG,CRX,DMRT1,DMRT2,DMRTA2,EP300,FOXD1,FOXJ1,FOXP1,HDAC2,HES1,HOXA5,IL6,JUN,MEF2A,MYC,NEUROG3,NKX6-1,PAX6,PAX8,POU1F1,POU3F2,POU5F1,RREB1,SP1,SRF,TCF12,TCF3,VDR,ZBTB16,ZEB1
GO:0043009	chordate embryonic development	23	550	1.72e-13	ENSP00000222726,ENSP00000232424,ENSP00000239461,ENSP00000244745,ENSP00000249501,ENSP00000259915,ENSP00000263253,ENSP00000265354,ENSP00000304169,ENSP00000305422,ENSP00000307208,ENSP00000309439,ENSP00000328928,ENSP00000338272,ENSP00000346886,ENSP00000350844,ENSP00000354487,ENSP00000371686,ENSP00000377721,ENSP00000404100,ENSP00000405890,ENSP00000419692,ENSP00000427514	BPTF,CEBPA,CEBPB,DMRT2,EP300,GABPA,HES1,HEY1,HOXA5,HOXB4,HOXB9,HOXD10,NR2F2,PAX5,PAX6,PBX1,PITX2,POU5F1,PRRX1,RXRA,SOX4,SRF,ZEB1
GO:0009952	anterior/posterior pattern specification	16	197	2.52e-13	ENSP00000222726,ENSP00000231656,ENSP00000232424,ENSP00000249501,ENSP00000253968,ENSP00000262238,ENSP00000263253,ENSP00000265354,ENSP00000283921,ENSP00000307208,ENSP00000309439,ENSP00000328928,ENSP00000338157,ENSP00000377721,ENSP00000404100,ENSP00000405890	BARX1,BPTF,CDX1,EP300,HES1,HOXA10,HOXA5,HOXB4,HOXB9,HOXD10,NR2F2,PAX6,PBX1,SRF,YY1,ZBTB16
GO:0042127	regulation of cell population proliferation	34	1594	4.4e-12	ENSP00000162391,ENSP00000222726,ENSP00000232424,ENSP00000239461,ENSP00000244745,ENSP00000262965,ENSP00000265354,ENSP00000293805,ENSP00000304169,ENSP00000305422,ENSP00000311816,ENSP00000312987,ENSP00000316842,ENSP00000323880,ENSP00000329170,ENSP00000329357,ENSP00000338157,ENSP00000342931,ENSP00000344352,ENSP00000354487,ENSP00000360266,ENSP00000369270,ENSP00000377721,ENSP00000378040,ENSP00000383909…	ATF3,BAD,BCL6,BCL6B,CEBPA,CEBPB,DMRTA2,FOXJ1,FOXJ2,FOXP1,HDAC2,HES1,HNF4A,HOXA5,IL6,JUN,MYC,NR2F2,PAX6,PBX1,PITX2,POU1F1,POU3F2,PRRX1,REST,RREB1,SIX5,SOX4,SP1,SRF,TCF3,VDR,ZBTB16,ZEB1
GO:0048732	gland development	19	395	4.88e-12	ENSP00000222726,ENSP00000232424,ENSP00000263334,ENSP00000265354,ENSP00000284000,ENSP00000290295,ENSP00000304169,ENSP00000305422,ENSP00000309439,ENSP00000329170,ENSP00000342931,ENSP00000344285,ENSP00000360266,ENSP00000360811,ENSP00000404100,ENSP00000405890,ENSP00000419692,ENSP00000427514,ENSP00000447173	BSX,CEBPA,CEBPB,CEBPG,HES1,HOXA5,HOXB13,HOXB9,JUN,LHX3,PAX6,PAX8,PBX1,PITX2,POU1F1,POU3F2,RXRA,SRF,VDR
GO:0045597	positive regulation of cell differentiation	26	908	1.12e-11	ENSP00000221996,ENSP00000222726,ENSP00000232424,ENSP00000242462,ENSP00000262965,ENSP00000263334,ENSP00000265354,ENSP00000295886,ENSP00000305422,ENSP00000323880,ENSP00000328928,ENSP00000338157,ENSP00000339906,ENSP00000346389,ENSP00000354487,ENSP00000360266,ENSP00000369270,ENSP00000378040,ENSP00000383909,ENSP00000384371,ENSP00000385675,ENSP00000388940,ENSP00000404100,ENSP00000427514,ENSP00000430432…	BAD,BCL6,CEBPA,CEBPB,CRX,DMRTA2,FOXJ1,HDAC2,HES1,HOXA5,HOXB4,IL6,JUN,MEF2A,NEUROG3,NKX6-1,PAX4,PAX6,PAX8,RREB1,SRF,TCF12,TCF3,VDR,ZBTB16,ZEB1
GO:0048568	embryonic organ development	19	417	1.2e-11	ENSP00000222726,ENSP00000232424,ENSP00000239461,ENSP00000249501,ENSP00000263334,ENSP00000265354,ENSP00000304169,ENSP00000304286,ENSP00000305422,ENSP00000307208,ENSP00000328928,ENSP00000338272,ENSP00000350844,ENSP00000354487,ENSP00000362296,ENSP00000377721,ENSP00000404100,ENSP00000405890,ENSP00000427514	BPTF,CEBPA,CEBPB,FOXI1,HES1,HEY1,HOXA5,HOXB4,HOXD10,NR2F2,PAX5,PAX6,PAX8,PBX1,PITX2,POU3F4,PRRX1,SRF,ZEB1
GO:0007399	nervous system development	39	2206	1.27e-11	ENSP00000221996,ENSP00000232424,ENSP00000233638,ENSP00000239461,ENSP00000242462,ENSP00000244745,ENSP00000249501,ENSP00000262965,ENSP00000263253,ENSP00000263334,ENSP00000265354,ENSP00000295886,ENSP00000304169,ENSP00000305422,ENSP00000307208,ENSP00000311816,ENSP00000323880,ENSP00000329170,ENSP00000338157,ENSP00000342931,ENSP00000346389,ENSP00000350844,ENSP00000354487,ENSP00000359357,ENSP00000360266…	BAD,BCL6,BPTF,CEBPB,CRX,DBX1,DMRTA2,EP300,FOXD1,FOXJ1,GFI1,HDAC2,HES1,HOXD10,IL6,JUN,LHX3,MEF2A,NEUROG3,NKX6-1,NR2F2,PAX5,PAX6,PAX8,PBX1,PITX2,POU1F1,POU3F2,POU3F4,POU6F1,PRRX1,REST,SOX4,SRF,TCF12,TCF3,TLX2,ZBTB16,ZEB1
GO:0045165	cell fate commitment	15	230	3.47e-11	ENSP00000232424,ENSP00000239461,ENSP00000249501,ENSP00000259915,ENSP00000262965,ENSP00000295886,ENSP00000305422,ENSP00000329170,ENSP00000342931,ENSP00000360811,ENSP00000377721,ENSP00000383909,ENSP00000385675,ENSP00000404100,ENSP00000436881	CEBPB,DBX1,DMRTA2,HES1,HOXD10,IL6,LHX3,NKX6-1,NR2F2,PAX6,POU1F1,POU3F2,POU5F1,PRRX1,TCF3
GO:0030097	hemopoiesis	20	526	6.44e-11	ENSP00000244745,ENSP00000246657,ENSP00000257555,ENSP00000262965,ENSP00000263253,ENSP00000265354,ENSP00000284000,ENSP00000311816,ENSP00000328928,ENSP00000338157,ENSP00000342931,ENSP00000359357,ENSP00000360266,ENSP00000377747,ENSP00000384371,ENSP00000385675,ENSP00000405890,ENSP00000427514,ENSP00000431603,ENSP00000484803	BCL6,CCR7,CEBPA,CEBPG,ENSG00000173575,EP300,FOXP1,GFI1,HNF1A,HOXB4,IL6,JUN,PBX1,POU1F1,POU2F2,REST,SOX4,SRF,TCF3,ZBTB16
GO:0048598	embryonic morphogenesis	20	545	1.19e-10	ENSP00000222726,ENSP00000232424,ENSP00000233638,ENSP00000239461,ENSP00000244745,ENSP00000249501,ENSP00000259915,ENSP00000263334,ENSP00000265354,ENSP00000283921,ENSP00000304169,ENSP00000304286,ENSP00000328928,ENSP00000338157,ENSP00000350844,ENSP00000354487,ENSP00000362296,ENSP00000404100,ENSP00000405890,ENSP00000430432	FOXI1,HDAC2,HES1,HOXA10,HOXA5,HOXB4,HOXD10,PAX5,PAX6,PAX8,PBX1,PITX2,POU3F4,POU5F1,PRRX1,SOX4,SRF,TLX2,ZBTB16,ZEB1
GO:0048699	generation of neurons	30	1422	2.3e-10	ENSP00000221996,ENSP00000232424,ENSP00000233638,ENSP00000239461,ENSP00000242462,ENSP00000244745,ENSP00000249501,ENSP00000262965,ENSP00000265354,ENSP00000295886,ENSP00000304169,ENSP00000305422,ENSP00000311816,ENSP00000329170,ENSP00000346389,ENSP00000354487,ENSP00000359357,ENSP00000360266,ENSP00000360811,ENSP00000362296,ENSP00000377721,ENSP00000383909,ENSP00000384371,ENSP00000385675,ENSP00000388940…	BCL6,CEBPB,CRX,DBX1,DMRTA2,FOXD1,GFI1,HDAC2,HES1,HOXD10,IL6,JUN,LHX3,MEF2A,NEUROG3,NKX6-1,NR2F2,PAX6,PBX1,PITX2,POU3F2,POU3F4,PRRX1,REST,SOX4,SRF,TCF12,TCF3,TLX2,ZEB1
GO:0060429	epithelium development	26	1055	2.88e-10	ENSP00000222726,ENSP00000232424,ENSP00000242462,ENSP00000244745,ENSP00000253968,ENSP00000263253,ENSP00000263334,ENSP00000265354,ENSP00000290295,ENSP00000295886,ENSP00000304169,ENSP00000305422,ENSP00000323880,ENSP00000327048,ENSP00000328928,ENSP00000338272,ENSP00000360266,ENSP00000371711,ENSP00000377721,ENSP00000404100,ENSP00000405890,ENSP00000419692,ENSP00000430432,ENSP00000447173,ENSP00000479618…	BARX1,CEBPB,DMRT1,EP300,FOXD1,FOXJ1,HDAC2,HES1,HEY1,HOXA5,HOXB13,HOXB4,JUN,MAF,MYC,NEUROG3,NKX6-1,NR2F2,PAX6,PAX8,PBX1,PITX2,RXRA,SOX4,SRF,VDR
GO:0001501	skeletal system development	18	457	5.11e-10	ENSP00000222726,ENSP00000231656,ENSP00000239461,ENSP00000244745,ENSP00000249501,ENSP00000263253,ENSP00000265354,ENSP00000283921,ENSP00000304169,ENSP00000309439,ENSP00000328928,ENSP00000338157,ENSP00000350844,ENSP00000354487,ENSP00000371686,ENSP00000405890,ENSP00000447173,ENSP00000484803	CDX1,DMRT2,EP300,FOXP1,HOXA10,HOXA5,HOXB4,HOXB9,HOXD10,PAX5,PBX1,PITX2,PRRX1,SOX4,SRF,VDR,ZBTB16,ZEB1
GO:0007417	central nervous system development	23	861	1.18e-09	ENSP00000232424,ENSP00000242462,ENSP00000244745,ENSP00000249501,ENSP00000263334,ENSP00000265354,ENSP00000295886,ENSP00000304169,ENSP00000307208,ENSP00000323880,ENSP00000329170,ENSP00000338157,ENSP00000342931,ENSP00000350844,ENSP00000354487,ENSP00000360811,ENSP00000362296,ENSP00000373895,ENSP00000377721,ENSP00000378040,ENSP00000383909,ENSP00000404100,ENSP00000436881	BAD,BPTF,DBX1,DMRTA2,FOXJ1,HES1,HOXD10,LHX3,NEUROG3,NKX6-1,NR2F2,PAX5,PAX6,PAX8,PITX2,POU1F1,POU3F2,POU3F4,POU6F1,SOX4,SRF,ZBTB16,ZEB1
GO:0035295	tube development	22	793	1.65e-09	ENSP00000222726,ENSP00000232424,ENSP00000239461,ENSP00000244745,ENSP00000263253,ENSP00000263334,ENSP00000265354,ENSP00000290295,ENSP00000304169,ENSP00000323880,ENSP00000326272,ENSP00000338272,ENSP00000354487,ENSP00000360266,ENSP00000360811,ENSP00000377721,ENSP00000404100,ENSP00000405890,ENSP00000427514,ENSP00000447173,ENSP00000479618,ENSP00000481581	CEBPA,EP300,FOXD1,FOXJ1,FOXL1,HES1,HEY1,HOXA5,HOXB13,JUN,LHX3,MYC,NR2F2,PAX6,PAX8,PBX1,PITX2,PRRX1,SOX4,SRF,VDR,ZEB1
GO:0007423	sensory organ development	18	515	3.25e-09	ENSP00000232424,ENSP00000239461,ENSP00000262238,ENSP00000263334,ENSP00000265354,ENSP00000304169,ENSP00000304286,ENSP00000316842,ENSP00000327048,ENSP00000339906,ENSP00000354487,ENSP00000360266,ENSP00000360811,ENSP00000362296,ENSP00000404100,ENSP00000419692,ENSP00000427514,ENSP00000430432	CEBPA,FOXI1,HDAC2,HES1,JUN,LHX3,MAF,PAX4,PAX6,PAX8,PITX2,POU3F4,PRRX1,RXRA,SIX5,SRF,YY1,ZEB1
GO:0048663	neuron fate commitment	9	68	3.95e-09	ENSP00000232424,ENSP00000239461,ENSP00000249501,ENSP00000295886,ENSP00000329170,ENSP00000360811,ENSP00000383909,ENSP00000404100,ENSP00000436881	DBX1,DMRTA2,HES1,HOXD10,LHX3,NKX6-1,PAX6,POU3F2,PRRX1
GO:0061061	muscle structure development	17	457	4.4e-09	ENSP00000232424,ENSP00000249501,ENSP00000263253,ENSP00000265354,ENSP00000304169,ENSP00000311816,ENSP00000328720,ENSP00000338272,ENSP00000344352,ENSP00000346389,ENSP00000350844,ENSP00000373895,ENSP00000377721,ENSP00000377747,ENSP00000383909,ENSP00000388940,ENSP00000419692	ATF3,DMRTA2,ENSG00000173575,EP300,FOXK1,HES1,HEY1,HOXD10,MEF2A,NR2F2,PAX5,PITX2,POU6F1,REST,RXRA,SRF,TCF12
GO:0001708	cell fate specification	9	72	6.18e-09	ENSP00000249501,ENSP00000259915,ENSP00000295886,ENSP00000329170,ENSP00000342931,ENSP00000360811,ENSP00000383909,ENSP00000404100,ENSP00000436881	DBX1,DMRTA2,HOXD10,LHX3,NKX6-1,PAX6,POU1F1,POU3F2,POU5F1
GO:1903706	regulation of hemopoiesis	16	412	8.62e-09	ENSP00000222726,ENSP00000232424,ENSP00000262965,ENSP00000263253,ENSP00000305422,ENSP00000323880,ENSP00000338157,ENSP00000343619,ENSP00000346886,ENSP00000354487,ENSP00000360266,ENSP00000378040,ENSP00000384371,ENSP00000388940,ENSP00000479618,ENSP00000484803	BAD,BCL6,CEBPB,EP300,FOXJ1,FOXP1,GABPA,HES1,HOXA5,HOXA9,JUN,MYC,TCF12,TCF3,ZBTB16,ZEB1
GO:0022603	regulation of anatomical structure morphogenesis	23	961	9.21e-09	ENSP00000162391,ENSP00000222726,ENSP00000231656,ENSP00000232424,ENSP00000233638,ENSP00000242462,ENSP00000259915,ENSP00000263334,ENSP00000265354,ENSP00000295886,ENSP00000312987,ENSP00000323880,ENSP00000329170,ENSP00000329357,ENSP00000338272,ENSP00000369270,ENSP00000371686,ENSP00000384371,ENSP00000385675,ENSP00000419692,ENSP00000447173,ENSP00000479618,ENSP00000484803	BCL6,CDX1,DMRT2,FOXJ1,FOXJ2,FOXP1,HES1,HEY1,HNF4A,HOXA5,IL6,MYC,NEUROG3,NKX6-1,PAX8,POU3F2,POU5F1,RREB1,RXRA,SP1,SRF,TLX2,VDR
GO:0022414	reproductive process	27	1350	9.83e-09	ENSP00000232424,ENSP00000249501,ENSP00000262238,ENSP00000283921,ENSP00000290295,ENSP00000297338,ENSP00000304169,ENSP00000305422,ENSP00000307208,ENSP00000312987,ENSP00000316842,ENSP00000323880,ENSP00000338157,ENSP00000338272,ENSP00000350844,ENSP00000360811,ENSP00000371711,ENSP00000377721,ENSP00000378040,ENSP00000379368,ENSP00000384371,ENSP00000405890,ENSP00000419457,ENSP00000419692,ENSP00000420267…	BAD,BCL6,BPTF,CEBPA,CEBPB,DMRT1,FOXJ1,HES1,HEY1,HNF4A,HOXA10,HOXB13,HOXD10,LHX3,NOBOX,NR2F2,NR6A1,PAX5,PBX1,PITX2,RAD21,RXRA,SIX5,VDR,YY1,ZBTB16,ZNF35
GO:0030855	epithelial cell differentiation	19	649	1.58e-08	ENSP00000222726,ENSP00000232424,ENSP00000242462,ENSP00000244745,ENSP00000253968,ENSP00000263334,ENSP00000290295,ENSP00000295886,ENSP00000304169,ENSP00000305422,ENSP00000323880,ENSP00000327048,ENSP00000338272,ENSP00000360266,ENSP00000371711,ENSP00000377721,ENSP00000404100,ENSP00000419692,ENSP00000430432	BARX1,CEBPB,DMRT1,FOXJ1,HDAC2,HES1,HEY1,HOXA5,HOXB13,JUN,MAF,NEUROG3,NKX6-1,NR2F2,PAX6,PAX8,PITX2,RXRA,SOX4
GO:0048468	cell development	28	1493	1.75e-08	ENSP00000222726,ENSP00000232424,ENSP00000244745,ENSP00000249501,ENSP00000263253,ENSP00000265354,ENSP00000290295,ENSP00000295886,ENSP00000304169,ENSP00000316842,ENSP00000323880,ENSP00000327048,ENSP00000329170,ENSP00000338157,ENSP00000342931,ENSP00000346389,ENSP00000360266,ENSP00000360811,ENSP00000371711,ENSP00000384371,ENSP00000385675,ENSP00000404100,ENSP00000419457,ENSP00000427514,ENSP00000430432…	BCL6,CEBPA,DMRT1,EP300,FOXD1,FOXJ1,FOXP1,HDAC2,HES1,HOXA5,HOXB13,HOXD10,IL6,JUN,LHX3,MAF,MEF2A,NKX6-1,NOBOX,PAX6,PITX2,POU1F1,POU2F2,POU3F2,SIX5,SOX4,SRF,ZBTB16
GO:0002521	leukocyte differentiation	14	313	2.01e-08	ENSP00000244745,ENSP00000246657,ENSP00000257555,ENSP00000262965,ENSP00000263253,ENSP00000265354,ENSP00000284000,ENSP00000342931,ENSP00000360266,ENSP00000384371,ENSP00000385675,ENSP00000427514,ENSP00000431603,ENSP00000484803	BCL6,CCR7,CEBPA,CEBPG,EP300,FOXP1,HNF1A,IL6,JUN,POU1F1,POU2F2,SOX4,SRF,TCF3
GO:0048665	neuron fate specification	7	33	2.3e-08	ENSP00000249501,ENSP00000295886,ENSP00000329170,ENSP00000360811,ENSP00000383909,ENSP00000404100,ENSP00000436881	DBX1,DMRTA2,HOXD10,LHX3,NKX6-1,PAX6,POU3F2
GO:0008285	negative regulation of cell population proliferation	19	669	2.5e-08	ENSP00000232424,ENSP00000244745,ENSP00000265354,ENSP00000305422,ENSP00000311816,ENSP00000312987,ENSP00000316842,ENSP00000323880,ENSP00000338157,ENSP00000342931,ENSP00000354487,ENSP00000360266,ENSP00000377721,ENSP00000384371,ENSP00000385675,ENSP00000404100,ENSP00000427514,ENSP00000447173,ENSP00000479618	BCL6,CEBPA,CEBPB,FOXJ1,HES1,HNF4A,IL6,JUN,MYC,NR2F2,PAX6,POU1F1,REST,SIX5,SOX4,SRF,VDR,ZBTB16,ZEB1
GO:0048562	embryonic organ morphogenesis	13	279	5.15e-08	ENSP00000222726,ENSP00000232424,ENSP00000239461,ENSP00000249501,ENSP00000263334,ENSP00000265354,ENSP00000304169,ENSP00000304286,ENSP00000328928,ENSP00000350844,ENSP00000354487,ENSP00000362296,ENSP00000404100	FOXI1,HES1,HOXA5,HOXB4,HOXD10,PAX5,PAX6,PAX8,PITX2,POU3F4,PRRX1,SRF,ZEB1
GO:0003006	developmental process involved in reproduction	18	622	5.4e-08	ENSP00000232424,ENSP00000283921,ENSP00000290295,ENSP00000304169,ENSP00000305422,ENSP00000307208,ENSP00000312987,ENSP00000316842,ENSP00000338157,ENSP00000338272,ENSP00000360811,ENSP00000371711,ENSP00000377721,ENSP00000405890,ENSP00000419457,ENSP00000419692,ENSP00000427514,ENSP00000447173	BPTF,CEBPA,CEBPB,DMRT1,HES1,HEY1,HNF4A,HOXA10,HOXB13,LHX3,NOBOX,NR2F2,PBX1,PITX2,RXRA,SIX5,VDR,ZBTB16
GO:0030098	lymphocyte differentiation	12	226	5.41e-08	ENSP00000244745,ENSP00000246657,ENSP00000257555,ENSP00000262965,ENSP00000263253,ENSP00000265354,ENSP00000284000,ENSP00000342931,ENSP00000384371,ENSP00000385675,ENSP00000431603,ENSP00000484803	BCL6,CCR7,CEBPG,EP300,FOXP1,HNF1A,IL6,POU1F1,POU2F2,SOX4,SRF,TCF3
GO:0008284	positive regulation of cell population proliferation	21	878	5.73e-08	ENSP00000162391,ENSP00000232424,ENSP00000239461,ENSP00000244745,ENSP00000262965,ENSP00000304169,ENSP00000329170,ENSP00000329357,ENSP00000342931,ENSP00000344352,ENSP00000360266,ENSP00000369270,ENSP00000378040,ENSP00000383909,ENSP00000384371,ENSP00000385675,ENSP00000404100,ENSP00000405890,ENSP00000430432,ENSP00000479618,ENSP00000484803	ATF3,BAD,BCL6,DMRTA2,FOXJ2,FOXP1,HDAC2,HES1,IL6,JUN,MYC,PAX6,PBX1,PITX2,POU1F1,POU3F2,PRRX1,RREB1,SOX4,SP1,TCF3
GO:0010033	response to organic substance	38	2815	6.52e-08	ENSP00000231509,ENSP00000244745,ENSP00000246657,ENSP00000259915,ENSP00000262238,ENSP00000263253,ENSP00000263334,ENSP00000265354,ENSP00000290295,ENSP00000295886,ENSP00000304169,ENSP00000305422,ENSP00000311816,ENSP00000312987,ENSP00000329170,ENSP00000329357,ENSP00000339906,ENSP00000344352,ENSP00000346886,ENSP00000354487,ENSP00000359357,ENSP00000360266,ENSP00000360532,ENSP00000363390,ENSP00000377721…	ATF3,BAD,BCL6,CCR7,CDC5L,CEBPA,CEBPB,CEBPD,EP300,FOXP1,GABPA,GFI1,HDAC2,HNF4A,HOXB13,IL6,JUN,MYC,NKX6-1,NR2F2,NR3C1,NR6A1,PAX4,PAX6,PAX8,PITX2,POU3F2,POU5F1,REST,RXRA,SOX4,SP1,SRF,TRIM63,VDR,YY1,ZEB1,ZNF35
GO:0007517	muscle organ development	13	287	6.88e-08	ENSP00000249501,ENSP00000263253,ENSP00000304169,ENSP00000328720,ENSP00000344352,ENSP00000346389,ENSP00000350844,ENSP00000373895,ENSP00000377721,ENSP00000377747,ENSP00000383909,ENSP00000388940,ENSP00000419692	ATF3,DMRTA2,ENSG00000173575,EP300,FOXK1,HOXD10,MEF2A,NR2F2,PAX5,PITX2,POU6F1,RXRA,TCF12
GO:0030856	regulation of epithelial cell differentiation	10	137	6.93e-08	ENSP00000162391,ENSP00000232424,ENSP00000263334,ENSP00000295886,ENSP00000305422,ENSP00000323880,ENSP00000354487,ENSP00000378040,ENSP00000404100,ENSP00000447173	BAD,CEBPB,FOXJ1,FOXJ2,HES1,NKX6-1,PAX6,PAX8,VDR,ZEB1
GO:0051241	negative regulation of multicellular organismal process	23	1098	1.01e-07	ENSP00000162391,ENSP00000222726,ENSP00000232424,ENSP00000233638,ENSP00000262238,ENSP00000262305,ENSP00000263334,ENSP00000265354,ENSP00000295886,ENSP00000311816,ENSP00000323880,ENSP00000338157,ENSP00000343619,ENSP00000346886,ENSP00000359357,ENSP00000363390,ENSP00000377721,ENSP00000384371,ENSP00000385675,ENSP00000404100,ENSP00000405890,ENSP00000430432,ENSP00000479618	BCL6,FOXJ1,FOXJ2,GABPA,GFI1,HDAC2,HES1,HOXA5,HOXA9,IL6,MYC,NKX6-1,NR2F2,PAX6,PAX8,PBX1,RAB11FIP3,REST,SRF,TLX2,TRIM63,YY1,ZBTB16
GO:0071310	cellular response to organic substance	33	2219	1.07e-07	ENSP00000231509,ENSP00000244745,ENSP00000246657,ENSP00000259915,ENSP00000262238,ENSP00000263253,ENSP00000263334,ENSP00000265354,ENSP00000295886,ENSP00000305422,ENSP00000311816,ENSP00000312987,ENSP00000329170,ENSP00000329357,ENSP00000344352,ENSP00000346886,ENSP00000354487,ENSP00000359357,ENSP00000360266,ENSP00000360532,ENSP00000377721,ENSP00000378040,ENSP00000379368,ENSP00000384371,ENSP00000385675…	ATF3,BAD,BCL6,CCR7,CDC5L,CEBPA,CEBPB,CEBPD,EP300,GABPA,GFI1,HDAC2,HNF4A,IL6,JUN,MYC,NKX6-1,NR2F2,NR3C1,NR6A1,PAX6,PAX8,POU3F2,POU5F1,REST,RXRA,SOX4,SP1,SRF,VDR,YY1,ZEB1,ZNF35
GO:0033993	response to lipid	20	825	1.12e-07	ENSP00000231509,ENSP00000246657,ENSP00000262238,ENSP00000290295,ENSP00000304169,ENSP00000305422,ENSP00000311816,ENSP00000312987,ENSP00000359357,ENSP00000360266,ENSP00000363390,ENSP00000377721,ENSP00000378040,ENSP00000379368,ENSP00000385675,ENSP00000419692,ENSP00000420267,ENSP00000430432,ENSP00000447173,ENSP00000484803	BAD,CCR7,CEBPB,FOXP1,GFI1,HDAC2,HNF4A,HOXB13,IL6,JUN,NR2F2,NR3C1,NR6A1,PITX2,REST,RXRA,TRIM63,VDR,YY1,ZNF35
GO:0060284	regulation of cell development	20	846	1.69e-07	ENSP00000221996,ENSP00000232424,ENSP00000233638,ENSP00000239461,ENSP00000242462,ENSP00000262965,ENSP00000265354,ENSP00000295886,ENSP00000311816,ENSP00000329170,ENSP00000354487,ENSP00000359357,ENSP00000369270,ENSP00000378040,ENSP00000383909,ENSP00000384371,ENSP00000388940,ENSP00000404100,ENSP00000405890,ENSP00000430432	BAD,BCL6,CRX,DMRTA2,GFI1,HDAC2,HES1,NEUROG3,NKX6-1,PAX6,PBX1,POU3F2,PRRX1,REST,RREB1,SRF,TCF12,TCF3,TLX2,ZEB1
GO:0045664	regulation of neuron differentiation	17	595	1.78e-07	ENSP00000221996,ENSP00000232424,ENSP00000233638,ENSP00000239461,ENSP00000242462,ENSP00000262965,ENSP00000265354,ENSP00000295886,ENSP00000311816,ENSP00000329170,ENSP00000354487,ENSP00000359357,ENSP00000384371,ENSP00000388940,ENSP00000404100,ENSP00000405890,ENSP00000430432	BCL6,CRX,GFI1,HDAC2,HES1,NEUROG3,NKX6-1,PAX6,PBX1,POU3F2,PRRX1,REST,SRF,TCF12,TCF3,TLX2,ZEB1
GO:0009725	response to hormone	20	854	1.94e-07	ENSP00000231509,ENSP00000246657,ENSP00000262238,ENSP00000263334,ENSP00000265354,ENSP00000290295,ENSP00000295886,ENSP00000304169,ENSP00000311816,ENSP00000312987,ENSP00000329357,ENSP00000360266,ENSP00000360532,ENSP00000363390,ENSP00000377721,ENSP00000378040,ENSP00000385675,ENSP00000419692,ENSP00000420267,ENSP00000447173	BAD,CCR7,CDC5L,HNF4A,HOXB13,IL6,JUN,NKX6-1,NR2F2,NR3C1,NR6A1,PAX8,PITX2,REST,RXRA,SP1,SRF,TRIM63,VDR,YY1
GO:0048729	tissue morphogenesis	16	522	1.95e-07	ENSP00000222726,ENSP00000232424,ENSP00000233638,ENSP00000244745,ENSP00000263334,ENSP00000265354,ENSP00000290295,ENSP00000304169,ENSP00000326272,ENSP00000328928,ENSP00000338272,ENSP00000405890,ENSP00000419692,ENSP00000447173,ENSP00000479618,ENSP00000481581	FOXD1,FOXL1,HES1,HEY1,HOXA5,HOXB13,HOXB4,MYC,PAX8,PBX1,PITX2,RXRA,SOX4,SRF,TLX2,VDR
GO:0045596	negative regulation of cell differentiation	18	683	2.03e-07	ENSP00000162391,ENSP00000222726,ENSP00000232424,ENSP00000233638,ENSP00000295886,ENSP00000311816,ENSP00000323880,ENSP00000338157,ENSP00000343619,ENSP00000346886,ENSP00000354487,ENSP00000359357,ENSP00000384371,ENSP00000385675,ENSP00000404100,ENSP00000405890,ENSP00000430432,ENSP00000479618	BCL6,FOXJ1,FOXJ2,GABPA,GFI1,HDAC2,HES1,HOXA5,HOXA9,IL6,MYC,NKX6-1,PAX6,PBX1,REST,TLX2,ZBTB16,ZEB1
GO:0009719	response to endogenous stimulus	25	1353	2.12e-07	ENSP00000231509,ENSP00000246657,ENSP00000259915,ENSP00000262238,ENSP00000263334,ENSP00000265354,ENSP00000290295,ENSP00000295886,ENSP00000304169,ENSP00000305422,ENSP00000311816,ENSP00000312987,ENSP00000329357,ENSP00000346886,ENSP00000354487,ENSP00000360266,ENSP00000360532,ENSP00000363390,ENSP00000377721,ENSP00000378040,ENSP00000385675,ENSP00000419692,ENSP00000420267,ENSP00000430432,ENSP00000447173	BAD,CCR7,CDC5L,CEBPB,GABPA,HDAC2,HNF4A,HOXB13,IL6,JUN,NKX6-1,NR2F2,NR3C1,NR6A1,PAX8,PITX2,POU5F1,REST,RXRA,SP1,SRF,TRIM63,VDR,YY1,ZEB1
GO:0048706	embryonic skeletal system development	9	122	3.78e-07	ENSP00000222726,ENSP00000239461,ENSP00000249501,ENSP00000309439,ENSP00000328928,ENSP00000350844,ENSP00000354487,ENSP00000371686,ENSP00000405890	DMRT2,HOXA5,HOXB4,HOXB9,HOXD10,PAX5,PBX1,PRRX1,ZEB1
GO:0072359	circulatory system development	19	807	4.31e-07	ENSP00000232424,ENSP00000239461,ENSP00000244745,ENSP00000259915,ENSP00000263253,ENSP00000263334,ENSP00000265354,ENSP00000290295,ENSP00000304169,ENSP00000311816,ENSP00000323880,ENSP00000326272,ENSP00000338272,ENSP00000346389,ENSP00000360266,ENSP00000373895,ENSP00000377721,ENSP00000404100,ENSP00000419692	EP300,FOXJ1,FOXL1,HES1,HEY1,HOXB13,JUN,MEF2A,NR2F2,PAX6,PAX8,PITX2,POU5F1,POU6F1,PRRX1,REST,RXRA,SOX4,SRF
GO:0007507	heart development	15	485	5.12e-07	ENSP00000232424,ENSP00000244745,ENSP00000259915,ENSP00000263253,ENSP00000263334,ENSP00000265354,ENSP00000304169,ENSP00000311816,ENSP00000323880,ENSP00000326272,ENSP00000338272,ENSP00000346389,ENSP00000360266,ENSP00000373895,ENSP00000419692	EP300,FOXJ1,FOXL1,HES1,HEY1,JUN,MEF2A,PAX8,PITX2,POU5F1,POU6F1,REST,RXRA,SOX4,SRF
GO:0050767	regulation of neurogenesis	18	730	5.33e-07	ENSP00000221996,ENSP00000232424,ENSP00000233638,ENSP00000239461,ENSP00000242462,ENSP00000262965,ENSP00000265354,ENSP00000295886,ENSP00000311816,ENSP00000329170,ENSP00000354487,ENSP00000359357,ENSP00000383909,ENSP00000384371,ENSP00000388940,ENSP00000404100,ENSP00000405890,ENSP00000430432	BCL6,CRX,DMRTA2,GFI1,HDAC2,HES1,NEUROG3,NKX6-1,PAX6,PBX1,POU3F2,PRRX1,REST,SRF,TCF12,TCF3,TLX2,ZEB1
GO:0070887	cellular response to chemical stimulus	35	2672	7.26e-07	ENSP00000231509,ENSP00000244745,ENSP00000246657,ENSP00000259915,ENSP00000262238,ENSP00000263253,ENSP00000263334,ENSP00000265354,ENSP00000295886,ENSP00000305422,ENSP00000309439,ENSP00000311816,ENSP00000312987,ENSP00000329170,ENSP00000329357,ENSP00000344352,ENSP00000346389,ENSP00000346886,ENSP00000354487,ENSP00000359357,ENSP00000360266,ENSP00000360532,ENSP00000377721,ENSP00000378040,ENSP00000379368…	ATF3,BAD,BCL6,CCR7,CDC5L,CEBPA,CEBPB,CEBPD,EP300,GABPA,GFI1,HDAC2,HNF4A,HOXB9,IL6,JUN,MEF2A,MYC,NKX6-1,NR2F2,NR3C1,NR6A1,PAX6,PAX8,POU3F2,POU5F1,REST,RXRA,SOX4,SP1,SRF,VDR,YY1,ZEB1,ZNF35
GO:0046649	lymphocyte activation	13	358	7.71e-07	ENSP00000244745,ENSP00000246657,ENSP00000257555,ENSP00000262965,ENSP00000263253,ENSP00000265354,ENSP00000284000,ENSP00000305422,ENSP00000342931,ENSP00000384371,ENSP00000385675,ENSP00000431603,ENSP00000484803	BCL6,CCR7,CEBPB,CEBPG,EP300,FOXP1,HNF1A,IL6,POU1F1,POU2F2,SOX4,SRF,TCF3
GO:0030900	forebrain development	13	366	9.83e-07	ENSP00000232424,ENSP00000242462,ENSP00000265354,ENSP00000304169,ENSP00000329170,ENSP00000342931,ENSP00000350844,ENSP00000360811,ENSP00000362296,ENSP00000377721,ENSP00000378040,ENSP00000383909,ENSP00000404100	BAD,DMRTA2,HES1,LHX3,NEUROG3,NR2F2,PAX5,PAX6,PITX2,POU1F1,POU3F2,POU3F4,SRF
GO:0001890	placenta development	9	145	1.47e-06	ENSP00000232424,ENSP00000305422,ENSP00000307208,ENSP00000338272,ENSP00000360811,ENSP00000377721,ENSP00000419692,ENSP00000427514,ENSP00000447173	BPTF,CEBPA,CEBPB,HES1,HEY1,LHX3,NR2F2,RXRA,VDR
GO:0031018	endocrine pancreas development	6	38	1.53e-06	ENSP00000242462,ENSP00000244745,ENSP00000295886,ENSP00000339906,ENSP00000385675,ENSP00000404100	IL6,NEUROG3,NKX6-1,PAX4,PAX6,SOX4
GO:0035239	tube morphogenesis	16	615	1.65e-06	ENSP00000222726,ENSP00000232424,ENSP00000239461,ENSP00000244745,ENSP00000263334,ENSP00000265354,ENSP00000290295,ENSP00000304169,ENSP00000338272,ENSP00000354487,ENSP00000360266,ENSP00000377721,ENSP00000405890,ENSP00000447173,ENSP00000479618,ENSP00000481581	FOXD1,HES1,HEY1,HOXA5,HOXB13,JUN,MYC,NR2F2,PAX8,PBX1,PITX2,PRRX1,SOX4,SRF,VDR,ZEB1
GO:1901700	response to oxygen-containing compound	24	1427	2.39e-06	ENSP00000231509,ENSP00000244745,ENSP00000246657,ENSP00000262238,ENSP00000265354,ENSP00000290295,ENSP00000295886,ENSP00000305422,ENSP00000312987,ENSP00000329357,ENSP00000339906,ENSP00000346886,ENSP00000354487,ENSP00000359357,ENSP00000360266,ENSP00000360532,ENSP00000377721,ENSP00000378040,ENSP00000379368,ENSP00000385675,ENSP00000419692,ENSP00000430432,ENSP00000447173,ENSP00000484803	BAD,CCR7,CDC5L,CEBPB,FOXP1,GABPA,GFI1,HDAC2,HNF4A,HOXB13,IL6,JUN,NKX6-1,NR2F2,NR3C1,PAX4,RXRA,SOX4,SP1,SRF,VDR,YY1,ZEB1,ZNF35
GO:0031016	pancreas development	7	72	2.5e-06	ENSP00000232424,ENSP00000242462,ENSP00000244745,ENSP00000295886,ENSP00000339906,ENSP00000385675,ENSP00000404100	HES1,IL6,NEUROG3,NKX6-1,PAX4,PAX6,SOX4
GO:0051093	negative regulation of developmental process	19	910	2.55e-06	ENSP00000162391,ENSP00000222726,ENSP00000232424,ENSP00000233638,ENSP00000263334,ENSP00000295886,ENSP00000311816,ENSP00000323880,ENSP00000338157,ENSP00000343619,ENSP00000346886,ENSP00000354487,ENSP00000359357,ENSP00000384371,ENSP00000385675,ENSP00000404100,ENSP00000405890,ENSP00000430432,ENSP00000479618	BCL6,FOXJ1,FOXJ2,GABPA,GFI1,HDAC2,HES1,HOXA5,HOXA9,IL6,MYC,NKX6-1,PAX6,PAX8,PBX1,REST,TLX2,ZBTB16,ZEB1
GO:0051090	regulation of DNA-binding transcription factor activity	13	403	2.75e-06	ENSP00000242462,ENSP00000262965,ENSP00000263253,ENSP00000265354,ENSP00000284000,ENSP00000295886,ENSP00000323880,ENSP00000343535,ENSP00000359357,ENSP00000360266,ENSP00000385675,ENSP00000405890,ENSP00000430432	CEBPG,EP300,FOXJ1,GFI1,HDAC2,IL6,JUN,NEUROG3,NKX6-1,PBX1,SRF,TCF3,USP7
GO:0021983	pituitary gland development	6	43	2.84e-06	ENSP00000232424,ENSP00000304169,ENSP00000329170,ENSP00000342931,ENSP00000360811,ENSP00000404100	HES1,LHX3,PAX6,PITX2,POU1F1,POU3F2
GO:0048608	reproductive structure development	13	405	2.87e-06	ENSP00000232424,ENSP00000283921,ENSP00000290295,ENSP00000304169,ENSP00000305422,ENSP00000307208,ENSP00000338272,ENSP00000360811,ENSP00000371711,ENSP00000377721,ENSP00000419692,ENSP00000427514,ENSP00000447173	BPTF,CEBPA,CEBPB,DMRT1,HES1,HEY1,HOXA10,HOXB13,LHX3,NR2F2,PITX2,RXRA,VDR
GO:0061138	morphogenesis of a branching epithelium	9	160	3.07e-06	ENSP00000222726,ENSP00000263334,ENSP00000265354,ENSP00000290295,ENSP00000304169,ENSP00000405890,ENSP00000447173,ENSP00000479618,ENSP00000481581	FOXD1,HOXA5,HOXB13,MYC,PAX8,PBX1,PITX2,SRF,VDR
GO:0009987	cellular process	93	14652	3.16e-06	ENSP00000162391,ENSP00000221996,ENSP00000222584,ENSP00000222726,ENSP00000231509,ENSP00000231656,ENSP00000232424,ENSP00000233638,ENSP00000239461,ENSP00000242462,ENSP00000244745,ENSP00000246657,ENSP00000249501,ENSP00000253968,ENSP00000257555,ENSP00000259915,ENSP00000262238,ENSP00000262305,ENSP00000262965,ENSP00000263253,ENSP00000263334,ENSP00000265354,ENSP00000266304,ENSP00000283921,ENSP00000284000…	ACOT7,ATF3,BAD,BARX1,BCL6,BPTF,BSX,CCR7,CDC5L,CDX1,CEBPA,CEBPB,CEBPD,CEBPG,CRX,DBX1,DMRT1,DMRT2,DMRTA2,ENSG00000173575,EP300,FOXD1,FOXI1,FOXJ1,FOXJ2,FOXK1,FOXL1,FOXP1,GABPA,GFI1,GFI1B,HDAC2,HES1,HEY1,HNF1A,HNF4A,HOXA10,HOXA5,HOXA9,HOXB13,HOXB4,HOXB9,HOXD10,IL6,JUN,LHX3,MAF,MEF2A,MYC,NEUROG3,NKX6-1,NOBOX,NR2F2,NR3C1,NR6A1,PAX4,PAX5,PAX6,PAX8,PBX1,PITX2,POU1F1,POU2F2,POU3F2,POU3F4,POU5F1,POU6F1,PRR…
GO:0007420	brain development	16	650	3.21e-06	ENSP00000232424,ENSP00000242462,ENSP00000265354,ENSP00000304169,ENSP00000307208,ENSP00000323880,ENSP00000329170,ENSP00000342931,ENSP00000350844,ENSP00000360811,ENSP00000362296,ENSP00000373895,ENSP00000377721,ENSP00000378040,ENSP00000383909,ENSP00000404100	BAD,BPTF,DMRTA2,FOXJ1,HES1,LHX3,NEUROG3,NR2F2,PAX5,PAX6,PITX2,POU1F1,POU3F2,POU3F4,POU6F1,SRF
GO:0010720	positive regulation of cell development	14	491	3.65e-06	ENSP00000221996,ENSP00000232424,ENSP00000242462,ENSP00000262965,ENSP00000265354,ENSP00000295886,ENSP00000354487,ENSP00000369270,ENSP00000378040,ENSP00000383909,ENSP00000384371,ENSP00000388940,ENSP00000404100,ENSP00000430432	BAD,BCL6,CRX,DMRTA2,HDAC2,HES1,NEUROG3,NKX6-1,PAX6,RREB1,SRF,TCF12,TCF3,ZEB1
GO:0021517	ventral spinal cord development	6	46	3.92e-06	ENSP00000244745,ENSP00000249501,ENSP00000295886,ENSP00000360811,ENSP00000404100,ENSP00000436881	DBX1,HOXD10,LHX3,NKX6-1,PAX6,SOX4
GO:0030182	neuron differentiation	19	940	3.92e-06	ENSP00000232424,ENSP00000239461,ENSP00000244745,ENSP00000249501,ENSP00000265354,ENSP00000295886,ENSP00000304169,ENSP00000305422,ENSP00000329170,ENSP00000346389,ENSP00000360266,ENSP00000360811,ENSP00000362296,ENSP00000383909,ENSP00000385675,ENSP00000404100,ENSP00000430432,ENSP00000436881,ENSP00000481581	CEBPB,DBX1,DMRTA2,FOXD1,HDAC2,HES1,HOXD10,IL6,JUN,LHX3,MEF2A,NKX6-1,PAX6,PITX2,POU3F2,POU3F4,PRRX1,SOX4,SRF
GO:0060993	kidney morphogenesis	7	82	5.26e-06	ENSP00000232424,ENSP00000244745,ENSP00000263334,ENSP00000323880,ENSP00000405890,ENSP00000479618,ENSP00000481581	FOXD1,FOXJ1,HES1,MYC,PAX8,PBX1,SOX4
GO:0043010	camera-type eye development	11	292	5.7e-06	ENSP00000262238,ENSP00000265354,ENSP00000304169,ENSP00000316842,ENSP00000327048,ENSP00000339906,ENSP00000354487,ENSP00000360266,ENSP00000404100,ENSP00000419692,ENSP00000430432	HDAC2,JUN,MAF,PAX4,PAX6,PITX2,RXRA,SIX5,SRF,YY1,ZEB1
GO:0060173	limb development	9	174	5.7e-06	ENSP00000239461,ENSP00000244745,ENSP00000249501,ENSP00000283921,ENSP00000304169,ENSP00000338157,ENSP00000377721,ENSP00000405890,ENSP00000430432	HDAC2,HOXA10,HOXD10,NR2F2,PBX1,PITX2,PRRX1,SOX4,ZBTB16
GO:0014070	response to organic cyclic compound	18	873	6.22e-06	ENSP00000231509,ENSP00000290295,ENSP00000305422,ENSP00000311816,ENSP00000312987,ENSP00000339906,ENSP00000346886,ENSP00000360266,ENSP00000360532,ENSP00000363390,ENSP00000377721,ENSP00000378040,ENSP00000385675,ENSP00000419692,ENSP00000420267,ENSP00000427514,ENSP00000430432,ENSP00000447173	BAD,CDC5L,CEBPA,CEBPB,GABPA,HDAC2,HNF4A,HOXB13,IL6,JUN,NR2F2,NR3C1,NR6A1,PAX4,REST,RXRA,TRIM63,VDR
GO:0048839	inner ear development	9	177	6.43e-06	ENSP00000232424,ENSP00000239461,ENSP00000263334,ENSP00000304286,ENSP00000327048,ENSP00000354487,ENSP00000360811,ENSP00000362296,ENSP00000427514	CEBPA,FOXI1,HES1,LHX3,MAF,PAX8,POU3F4,PRRX1,ZEB1
GO:0021515	cell differentiation in spinal cord	6	52	7.19e-06	ENSP00000244745,ENSP00000249501,ENSP00000295886,ENSP00000360811,ENSP00000404100,ENSP00000436881	DBX1,HOXD10,LHX3,NKX6-1,PAX6,SOX4
GO:0001701	in utero embryonic development	11	306	8.59e-06	ENSP00000232424,ENSP00000259915,ENSP00000265354,ENSP00000304169,ENSP00000305422,ENSP00000307208,ENSP00000338272,ENSP00000346886,ENSP00000377721,ENSP00000419692,ENSP00000427514	BPTF,CEBPA,CEBPB,GABPA,HES1,HEY1,NR2F2,PITX2,POU5F1,RXRA,SRF
GO:0048754	branching morphogenesis of an epithelial tube	8	134	9.11e-06	ENSP00000222726,ENSP00000263334,ENSP00000265354,ENSP00000304169,ENSP00000405890,ENSP00000447173,ENSP00000479618,ENSP00000481581	FOXD1,HOXA5,MYC,PAX8,PBX1,PITX2,SRF,VDR
GO:0001823	mesonephros development	7	91	9.64e-06	ENSP00000232424,ENSP00000263334,ENSP00000323880,ENSP00000338157,ENSP00000405890,ENSP00000479618,ENSP00000481581	FOXD1,FOXJ1,HES1,MYC,PAX8,PBX1,ZBTB16
GO:0021521	ventral spinal cord interneuron specification	4	11	1.24e-05	ENSP00000295886,ENSP00000360811,ENSP00000404100,ENSP00000436881	DBX1,LHX3,NKX6-1,PAX6
GO:0030858	positive regulation of epithelial cell differentiation	6	59	1.38e-05	ENSP00000263334,ENSP00000295886,ENSP00000323880,ENSP00000378040,ENSP00000404100,ENSP00000447173	BAD,FOXJ1,NKX6-1,PAX6,PAX8,VDR
GO:0002376	immune system process	30	2370	1.71e-05	ENSP00000232424,ENSP00000244745,ENSP00000246657,ENSP00000253968,ENSP00000257555,ENSP00000262965,ENSP00000263253,ENSP00000265354,ENSP00000284000,ENSP00000293805,ENSP00000304169,ENSP00000305422,ENSP00000311816,ENSP00000323880,ENSP00000326272,ENSP00000328928,ENSP00000338157,ENSP00000342931,ENSP00000350844,ENSP00000354487,ENSP00000359357,ENSP00000360266,ENSP00000377747,ENSP00000384371,ENSP00000385675…	BARX1,BCL6,BCL6B,CCR7,CEBPA,CEBPB,CEBPG,ENSG00000173575,EP300,FOXJ1,FOXL1,FOXP1,GFI1,HES1,HNF1A,HOXB4,IL6,JUN,PAX5,PBX1,PITX2,POU1F1,POU2F2,REST,SOX4,SRF,TCF12,TCF3,ZBTB16,ZEB1
GO:0021522	spinal cord motor neuron differentiation	5	32	1.71e-05	ENSP00000244745,ENSP00000249501,ENSP00000295886,ENSP00000360811,ENSP00000404100	HOXD10,LHX3,NKX6-1,PAX6,SOX4
GO:0035108	limb morphogenesis	8	147	1.71e-05	ENSP00000239461,ENSP00000244745,ENSP00000249501,ENSP00000283921,ENSP00000304169,ENSP00000338157,ENSP00000405890,ENSP00000430432	HDAC2,HOXA10,HOXD10,PBX1,PITX2,PRRX1,SOX4,ZBTB16
GO:1903707	negative regulation of hemopoiesis	8	148	1.77e-05	ENSP00000222726,ENSP00000232424,ENSP00000323880,ENSP00000338157,ENSP00000343619,ENSP00000346886,ENSP00000384371,ENSP00000479618	BCL6,FOXJ1,GABPA,HES1,HOXA5,HOXA9,MYC,ZBTB16
GO:0030099	myeloid cell differentiation	9	203	1.78e-05	ENSP00000246657,ENSP00000263253,ENSP00000265354,ENSP00000284000,ENSP00000338157,ENSP00000360266,ENSP00000384371,ENSP00000427514,ENSP00000484803	BCL6,CCR7,CEBPA,CEBPG,EP300,FOXP1,JUN,SRF,ZBTB16
GO:0071396	cellular response to lipid	13	486	1.82e-05	ENSP00000231509,ENSP00000305422,ENSP00000311816,ENSP00000312987,ENSP00000359357,ENSP00000377721,ENSP00000378040,ENSP00000379368,ENSP00000385675,ENSP00000419692,ENSP00000420267,ENSP00000430432,ENSP00000447173	BAD,CEBPB,GFI1,HDAC2,HNF4A,IL6,NR2F2,NR3C1,NR6A1,REST,RXRA,VDR,ZNF35
GO:0021510	spinal cord development	7	103	1.98e-05	ENSP00000242462,ENSP00000244745,ENSP00000249501,ENSP00000295886,ENSP00000360811,ENSP00000404100,ENSP00000436881	DBX1,HOXD10,LHX3,NEUROG3,NKX6-1,PAX6,SOX4
GO:0035051	cardiocyte differentiation	7	103	1.98e-05	ENSP00000232424,ENSP00000259915,ENSP00000265354,ENSP00000304169,ENSP00000311816,ENSP00000346389,ENSP00000419692	HES1,MEF2A,PITX2,POU5F1,REST,RXRA,SRF
GO:0021520	spinal cord motor neuron cell fate specification	4	13	1.99e-05	ENSP00000249501,ENSP00000295886,ENSP00000360811,ENSP00000404100	HOXD10,LHX3,NKX6-1,PAX6
GO:0042221	response to chemical	42	4153	1.99e-05	ENSP00000231509,ENSP00000244745,ENSP00000246657,ENSP00000259915,ENSP00000262238,ENSP00000263253,ENSP00000263334,ENSP00000265354,ENSP00000290295,ENSP00000295886,ENSP00000304169,ENSP00000305422,ENSP00000309439,ENSP00000311816,ENSP00000312987,ENSP00000329170,ENSP00000329357,ENSP00000339906,ENSP00000344352,ENSP00000346389,ENSP00000346886,ENSP00000354487,ENSP00000359357,ENSP00000360266,ENSP00000360532…	ATF3,BAD,BCL6,CCR7,CDC5L,CEBPA,CEBPB,CEBPD,EP300,FOXD1,FOXP1,GABPA,GFI1,HDAC2,HNF4A,HOXB13,HOXB9,IL6,JUN,LHX3,MEF2A,MYC,NKX6-1,NR2F2,NR3C1,NR6A1,PAX4,PAX6,PAX8,PITX2,POU3F2,POU5F1,REST,RXRA,SOX4,SP1,SRF,TRIM63,VDR,YY1,ZEB1,ZNF35
GO:0002009	morphogenesis of an epithelium	12	414	2.07e-05	ENSP00000222726,ENSP00000232424,ENSP00000244745,ENSP00000263334,ENSP00000265354,ENSP00000290295,ENSP00000304169,ENSP00000328928,ENSP00000405890,ENSP00000447173,ENSP00000479618,ENSP00000481581	FOXD1,HES1,HOXA5,HOXB13,HOXB4,MYC,PAX8,PBX1,PITX2,SOX4,SRF,VDR
GO:0014706	striated muscle tissue development	10	271	2.09e-05	ENSP00000249501,ENSP00000263253,ENSP00000265354,ENSP00000304169,ENSP00000344352,ENSP00000346389,ENSP00000350844,ENSP00000377721,ENSP00000383909,ENSP00000419692	ATF3,DMRTA2,EP300,HOXD10,MEF2A,NR2F2,PAX5,PITX2,RXRA,SRF
GO:0050769	positive regulation of neurogenesis	12	425	2.66e-05	ENSP00000221996,ENSP00000232424,ENSP00000242462,ENSP00000262965,ENSP00000265354,ENSP00000295886,ENSP00000354487,ENSP00000383909,ENSP00000384371,ENSP00000388940,ENSP00000404100,ENSP00000430432	BCL6,CRX,DMRTA2,HDAC2,HES1,NEUROG3,NKX6-1,PAX6,SRF,TCF12,TCF3,ZEB1
GO:0030324	lung development	8	162	3.11e-05	ENSP00000222726,ENSP00000232424,ENSP00000263253,ENSP00000265354,ENSP00000304169,ENSP00000323880,ENSP00000360811,ENSP00000427514	CEBPA,EP300,FOXJ1,HES1,HOXA5,LHX3,PITX2,SRF
GO:0051704	multi-organism process	28	2222	4.37e-05	ENSP00000246657,ENSP00000249501,ENSP00000262238,ENSP00000263253,ENSP00000283921,ENSP00000305422,ENSP00000311816,ENSP00000316842,ENSP00000323880,ENSP00000329357,ENSP00000338157,ENSP00000343535,ENSP00000350844,ENSP00000359357,ENSP00000360266,ENSP00000371711,ENSP00000377721,ENSP00000378040,ENSP00000379368,ENSP00000384371,ENSP00000385675,ENSP00000419457,ENSP00000419692,ENSP00000420267,ENSP00000427514…	BAD,BCL6,CCR7,CEBPA,CEBPB,DMRT1,EP300,FOXJ1,FOXP1,GFI1,HDAC2,HOXA10,HOXD10,IL6,JUN,NOBOX,NR2F2,NR6A1,PAX5,REST,RXRA,SIX5,SP1,USP7,VDR,YY1,ZBTB16,ZNF35
GO:0060562	epithelial tube morphogenesis	10	298	4.52e-05	ENSP00000222726,ENSP00000232424,ENSP00000244745,ENSP00000263334,ENSP00000265354,ENSP00000304169,ENSP00000405890,ENSP00000447173,ENSP00000479618,ENSP00000481581	FOXD1,HES1,HOXA5,MYC,PAX8,PBX1,PITX2,SOX4,SRF,VDR
GO:0001655	urogenital system development	10	299	4.6e-05	ENSP00000232424,ENSP00000244745,ENSP00000263334,ENSP00000290295,ENSP00000323880,ENSP00000338157,ENSP00000405890,ENSP00000419692,ENSP00000479618,ENSP00000481581	FOXD1,FOXJ1,HES1,HOXB13,MYC,PAX8,PBX1,RXRA,SOX4,ZBTB16
GO:0060850	regulation of transcription involved in cell fate commitment	4	17	4.6e-05	ENSP00000295886,ENSP00000305422,ENSP00000377721,ENSP00000404100	CEBPB,NKX6-1,NR2F2,PAX6
GO:0007519	skeletal muscle tissue development	7	122	5.22e-05	ENSP00000249501,ENSP00000263253,ENSP00000304169,ENSP00000344352,ENSP00000350844,ENSP00000377721,ENSP00000383909	ATF3,DMRTA2,EP300,HOXD10,NR2F2,PAX5,PITX2
GO:0030326	embryonic limb morphogenesis	7	126	6.36e-05	ENSP00000239461,ENSP00000249501,ENSP00000283921,ENSP00000304169,ENSP00000338157,ENSP00000405890,ENSP00000430432	HDAC2,HOXA10,HOXD10,PBX1,PITX2,PRRX1,ZBTB16
GO:0050678	regulation of epithelial cell proliferation	10	311	6.36e-05	ENSP00000222726,ENSP00000232424,ENSP00000329357,ENSP00000360266,ENSP00000369270,ENSP00000377721,ENSP00000378040,ENSP00000404100,ENSP00000447173,ENSP00000479618	BAD,HES1,HOXA5,JUN,MYC,NR2F2,PAX6,RREB1,SP1,VDR
GO:0090596	sensory organ morphogenesis	9	248	7.57e-05	ENSP00000239461,ENSP00000262238,ENSP00000263334,ENSP00000304169,ENSP00000304286,ENSP00000354487,ENSP00000362296,ENSP00000404100,ENSP00000430432	FOXI1,HDAC2,PAX6,PAX8,PITX2,POU3F4,PRRX1,YY1,ZEB1
GO:0045637	regulation of myeloid cell differentiation	9	249	7.74e-05	ENSP00000222726,ENSP00000263253,ENSP00000305422,ENSP00000338157,ENSP00000343619,ENSP00000346886,ENSP00000360266,ENSP00000479618,ENSP00000484803	CEBPB,EP300,FOXP1,GABPA,HOXA5,HOXA9,JUN,MYC,ZBTB16
GO:0048545	response to steroid hormone	10	324	8.77e-05	ENSP00000231509,ENSP00000311816,ENSP00000312987,ENSP00000363390,ENSP00000377721,ENSP00000378040,ENSP00000385675,ENSP00000419692,ENSP00000420267,ENSP00000447173	BAD,HNF4A,IL6,NR2F2,NR3C1,NR6A1,REST,RXRA,TRIM63,VDR
GO:0001657	ureteric bud development	6	86	8.87e-05	ENSP00000232424,ENSP00000263334,ENSP00000323880,ENSP00000405890,ENSP00000479618,ENSP00000481581	FOXD1,FOXJ1,HES1,MYC,PAX8,PBX1
GO:0001892	embryonic placenta development	6	86	8.87e-05	ENSP00000232424,ENSP00000305422,ENSP00000307208,ENSP00000338272,ENSP00000377721,ENSP00000427514	BPTF,CEBPA,CEBPB,HES1,HEY1,NR2F2
GO:0048609	multicellular organismal reproductive process	15	766	9.42e-05	ENSP00000262238,ENSP00000283921,ENSP00000316842,ENSP00000323880,ENSP00000338157,ENSP00000350844,ENSP00000371711,ENSP00000377721,ENSP00000378040,ENSP00000379368,ENSP00000384371,ENSP00000419457,ENSP00000419692,ENSP00000420267,ENSP00000447173	BAD,BCL6,DMRT1,FOXJ1,HOXA10,NOBOX,NR2F2,NR6A1,PAX5,RXRA,SIX5,VDR,YY1,ZBTB16,ZNF35
GO:1902105	regulation of leukocyte differentiation	9	261	0.00011	ENSP00000305422,ENSP00000323880,ENSP00000338157,ENSP00000354487,ENSP00000360266,ENSP00000378040,ENSP00000384371,ENSP00000479618,ENSP00000484803	BAD,BCL6,CEBPB,FOXJ1,FOXP1,JUN,MYC,ZBTB16,ZEB1
GO:0002065	columnar/cuboidal epithelial cell differentiation	6	91	0.00012	ENSP00000222726,ENSP00000232424,ENSP00000244745,ENSP00000295886,ENSP00000404100,ENSP00000419692	HES1,HOXA5,NKX6-1,PAX6,RXRA,SOX4
GO:0048704	embryonic skeletal system morphogenesis	6	92	0.00012	ENSP00000222726,ENSP00000239461,ENSP00000249501,ENSP00000328928,ENSP00000350844,ENSP00000354487	HOXA5,HOXB4,HOXD10,PAX5,PRRX1,ZEB1
GO:0035019	somatic stem cell population maintenance	5	53	0.00013	ENSP00000232424,ENSP00000244745,ENSP00000259915,ENSP00000405890,ENSP00000484803	FOXP1,HES1,PBX1,POU5F1,SOX4
GO:0060675	ureteric bud morphogenesis	5	53	0.00013	ENSP00000232424,ENSP00000263334,ENSP00000405890,ENSP00000479618,ENSP00000481581	FOXD1,HES1,MYC,PAX8,PBX1
GO:0071407	cellular response to organic cyclic compound	12	505	0.00013	ENSP00000231509,ENSP00000305422,ENSP00000311816,ENSP00000312987,ENSP00000346886,ENSP00000360532,ENSP00000377721,ENSP00000419692,ENSP00000420267,ENSP00000427514,ENSP00000430432,ENSP00000447173	CDC5L,CEBPA,CEBPB,GABPA,HDAC2,HNF4A,NR2F2,NR3C1,NR6A1,REST,RXRA,VDR
GO:1901701	cellular response to oxygen-containing compound	16	896	0.00013	ENSP00000231509,ENSP00000244745,ENSP00000265354,ENSP00000295886,ENSP00000305422,ENSP00000329357,ENSP00000346886,ENSP00000354487,ENSP00000359357,ENSP00000360266,ENSP00000360532,ENSP00000378040,ENSP00000379368,ENSP00000385675,ENSP00000430432,ENSP00000447173	BAD,CDC5L,CEBPB,GABPA,GFI1,HDAC2,IL6,JUN,NKX6-1,NR3C1,SOX4,SP1,SRF,VDR,ZEB1,ZNF35
GO:0010817	regulation of hormone levels	12	511	0.00014	ENSP00000244745,ENSP00000257555,ENSP00000262305,ENSP00000263334,ENSP00000295886,ENSP00000311816,ENSP00000312987,ENSP00000359357,ENSP00000378040,ENSP00000385675,ENSP00000447173,ENSP00000481581	BAD,FOXD1,GFI1,HNF1A,HNF4A,IL6,NKX6-1,PAX8,RAB11FIP3,REST,SOX4,VDR
GO:0072009	nephron epithelium development	6	97	0.00016	ENSP00000232424,ENSP00000263334,ENSP00000323880,ENSP00000405890,ENSP00000479618,ENSP00000481581	FOXD1,FOXJ1,HES1,MYC,PAX8,PBX1
GO:0030183	B cell differentiation	6	99	0.00018	ENSP00000262965,ENSP00000263253,ENSP00000284000,ENSP00000342931,ENSP00000384371,ENSP00000431603	BCL6,CEBPG,EP300,POU1F1,POU2F2,TCF3
GO:0044703	multi-organism reproductive process	16	923	0.00019	ENSP00000249501,ENSP00000262238,ENSP00000283921,ENSP00000316842,ENSP00000323880,ENSP00000338157,ENSP00000350844,ENSP00000371711,ENSP00000377721,ENSP00000378040,ENSP00000379368,ENSP00000384371,ENSP00000419457,ENSP00000419692,ENSP00000420267,ENSP00000447173	BAD,BCL6,DMRT1,FOXJ1,HOXA10,HOXD10,NOBOX,NR2F2,NR6A1,PAX5,RXRA,SIX5,VDR,YY1,ZBTB16,ZNF35
GO:0043921	modulation by host of viral transcription	4	27	0.0002	ENSP00000263253,ENSP00000311816,ENSP00000329357,ENSP00000360266	EP300,JUN,REST,SP1
GO:0048844	artery morphogenesis	5	59	0.0002	ENSP00000232424,ENSP00000239461,ENSP00000244745,ENSP00000265354,ENSP00000338272	HES1,HEY1,PRRX1,SOX4,SRF
GO:0002682	regulation of immune system process	20	1391	0.00021	ENSP00000222726,ENSP00000232424,ENSP00000246657,ENSP00000262965,ENSP00000263253,ENSP00000305422,ENSP00000323880,ENSP00000338157,ENSP00000343619,ENSP00000346886,ENSP00000350844,ENSP00000354487,ENSP00000359357,ENSP00000360266,ENSP00000378040,ENSP00000384371,ENSP00000385675,ENSP00000388940,ENSP00000479618,ENSP00000484803	BAD,BCL6,CCR7,CEBPB,EP300,FOXJ1,FOXP1,GABPA,GFI1,HES1,HOXA5,HOXA9,IL6,JUN,MYC,PAX5,TCF12,TCF3,ZBTB16,ZEB1
GO:0048646	anatomical structure formation involved in morphogenesis	15	831	0.00022	ENSP00000233638,ENSP00000244745,ENSP00000259915,ENSP00000263253,ENSP00000263334,ENSP00000265354,ENSP00000290295,ENSP00000304169,ENSP00000338272,ENSP00000346389,ENSP00000360266,ENSP00000384371,ENSP00000404100,ENSP00000430432,ENSP00000481581	BCL6,EP300,FOXD1,HDAC2,HEY1,HOXB13,JUN,MEF2A,PAX6,PAX8,PITX2,POU5F1,SOX4,SRF,TLX2
GO:0035909	aorta morphogenesis	4	28	0.00023	ENSP00000232424,ENSP00000244745,ENSP00000265354,ENSP00000338272	HES1,HEY1,SOX4,SRF
GO:2000144	positive regulation of DNA-templated transcription, initiation	4	29	0.00025	ENSP00000257555,ENSP00000265354,ENSP00000360266,ENSP00000427514	CEBPA,HNF1A,JUN,SRF
GO:0051817	modification of morphology or physiology of other organism involved in symbiotic interaction	6	107	0.00026	ENSP00000263253,ENSP00000311816,ENSP00000329357,ENSP00000360266,ENSP00000378040,ENSP00000419692	BAD,EP300,JUN,REST,RXRA,SP1
GO:0003205	cardiac chamber development	7	166	0.0003	ENSP00000232424,ENSP00000244745,ENSP00000263334,ENSP00000265354,ENSP00000304169,ENSP00000338272,ENSP00000419692	HES1,HEY1,PAX8,PITX2,RXRA,SOX4,SRF
GO:0050863	regulation of T cell activation	9	302	0.0003	ENSP00000232424,ENSP00000246657,ENSP00000305422,ENSP00000323880,ENSP00000338157,ENSP00000354487,ENSP00000378040,ENSP00000384371,ENSP00000385675	BAD,BCL6,CCR7,CEBPB,FOXJ1,HES1,IL6,ZBTB16,ZEB1
GO:0021953	central nervous system neuron differentiation	7	169	0.00033	ENSP00000244745,ENSP00000249501,ENSP00000295886,ENSP00000360811,ENSP00000362296,ENSP00000404100,ENSP00000436881	DBX1,HOXD10,LHX3,NKX6-1,PAX6,POU3F4,SOX4
GO:0042593	glucose homeostasis	7	169	0.00033	ENSP00000244745,ENSP00000257555,ENSP00000265354,ENSP00000312987,ENSP00000378040,ENSP00000404100,ENSP00000427514	BAD,CEBPA,HNF1A,HNF4A,PAX6,SOX4,SRF
GO:2000736	regulation of stem cell differentiation	5	67	0.00034	ENSP00000232424,ENSP00000262965,ENSP00000311816,ENSP00000328928,ENSP00000388940	HES1,HOXB4,REST,TCF12,TCF3
GO:0019953	sexual reproduction	14	764	0.00035	ENSP00000249501,ENSP00000262238,ENSP00000283921,ENSP00000316842,ENSP00000323880,ENSP00000338157,ENSP00000350844,ENSP00000371711,ENSP00000377721,ENSP00000378040,ENSP00000379368,ENSP00000384371,ENSP00000419457,ENSP00000420267	BAD,BCL6,DMRT1,FOXJ1,HOXA10,HOXD10,NOBOX,NR2F2,NR6A1,PAX5,SIX5,YY1,ZBTB16,ZNF35
GO:0051145	smooth muscle cell differentiation	4	32	0.00035	ENSP00000232424,ENSP00000265354,ENSP00000304169,ENSP00000338272	HES1,HEY1,PITX2,SRF
GO:0007219	Notch signaling pathway	6	116	0.00038	ENSP00000232424,ENSP00000263253,ENSP00000338272,ENSP00000405890,ENSP00000427514,ENSP00000479618	CEBPA,EP300,HES1,HEY1,MYC,PBX1
GO:0051101	regulation of DNA binding	6	116	0.00038	ENSP00000232424,ENSP00000284000,ENSP00000304169,ENSP00000338272,ENSP00000360266,ENSP00000430432	CEBPG,HDAC2,HES1,HEY1,JUN,PITX2
GO:0003281	ventricular septum development	5	70	0.00041	ENSP00000232424,ENSP00000244745,ENSP00000263334,ENSP00000304169,ENSP00000338272	HES1,HEY1,PAX8,PITX2,SOX4
GO:0019827	stem cell population maintenance	6	118	0.00041	ENSP00000232424,ENSP00000239461,ENSP00000244745,ENSP00000259915,ENSP00000405890,ENSP00000484803	FOXP1,HES1,PBX1,POU5F1,PRRX1,SOX4
GO:0071495	cellular response to endogenous stimulus	17	1106	0.00041	ENSP00000231509,ENSP00000259915,ENSP00000263334,ENSP00000295886,ENSP00000305422,ENSP00000311816,ENSP00000312987,ENSP00000329357,ENSP00000346886,ENSP00000354487,ENSP00000360266,ENSP00000360532,ENSP00000377721,ENSP00000419692,ENSP00000420267,ENSP00000430432,ENSP00000447173	CDC5L,CEBPB,GABPA,HDAC2,HNF4A,JUN,NKX6-1,NR2F2,NR3C1,NR6A1,PAX8,POU5F1,REST,RXRA,SP1,VDR,ZEB1
GO:0032350	regulation of hormone metabolic process	4	34	0.00042	ENSP00000263334,ENSP00000311816,ENSP00000359357,ENSP00000447173	GFI1,PAX8,REST,VDR
GO:0048536	spleen development	4	34	0.00042	ENSP00000253968,ENSP00000304169,ENSP00000328928,ENSP00000405890	BARX1,HOXB4,PBX1,PITX2
GO:0051249	regulation of lymphocyte activation	10	401	0.00043	ENSP00000232424,ENSP00000246657,ENSP00000262965,ENSP00000305422,ENSP00000323880,ENSP00000338157,ENSP00000354487,ENSP00000378040,ENSP00000384371,ENSP00000385675	BAD,BCL6,CCR7,CEBPB,FOXJ1,HES1,IL6,TCF3,ZBTB16,ZEB1
GO:1902930	regulation of alcohol biosynthetic process	5	71	0.00043	ENSP00000311816,ENSP00000329357,ENSP00000342931,ENSP00000359357,ENSP00000447173	GFI1,POU1F1,REST,SP1,VDR
GO:0007283	spermatogenesis	11	490	0.00044	ENSP00000262238,ENSP00000283921,ENSP00000316842,ENSP00000323880,ENSP00000338157,ENSP00000350844,ENSP00000371711,ENSP00000378040,ENSP00000379368,ENSP00000384371,ENSP00000420267	BAD,BCL6,DMRT1,FOXJ1,HOXA10,NR6A1,PAX5,SIX5,YY1,ZBTB16,ZNF35
GO:0032870	cellular response to hormone stimulus	12	585	0.00045	ENSP00000231509,ENSP00000263334,ENSP00000295886,ENSP00000311816,ENSP00000312987,ENSP00000329357,ENSP00000360266,ENSP00000360532,ENSP00000377721,ENSP00000419692,ENSP00000420267,ENSP00000447173	CDC5L,HNF4A,JUN,NKX6-1,NR2F2,NR3C1,NR6A1,PAX8,REST,RXRA,SP1,VDR
GO:0001822	kidney development	8	251	0.0005	ENSP00000232424,ENSP00000244745,ENSP00000263334,ENSP00000323880,ENSP00000338157,ENSP00000405890,ENSP00000479618,ENSP00000481581	FOXD1,FOXJ1,HES1,MYC,PAX8,PBX1,SOX4,ZBTB16
GO:0003231	cardiac ventricle development	6	125	0.00053	ENSP00000232424,ENSP00000244745,ENSP00000263334,ENSP00000304169,ENSP00000338272,ENSP00000419692	HES1,HEY1,PAX8,PITX2,RXRA,SOX4
GO:0060218	hematopoietic stem cell differentiation	3	12	0.00056	ENSP00000265354,ENSP00000328928,ENSP00000377747	ENSG00000173575,HOXB4,SRF
GO:0002067	glandular epithelial cell differentiation	4	38	0.0006	ENSP00000222726,ENSP00000295886,ENSP00000404100,ENSP00000419692	HOXA5,NKX6-1,PAX6,RXRA
GO:0003206	cardiac chamber morphogenesis	6	128	0.0006	ENSP00000232424,ENSP00000244745,ENSP00000265354,ENSP00000304169,ENSP00000338272,ENSP00000419692	HES1,HEY1,PITX2,RXRA,SOX4,SRF
GO:0050768	negative regulation of neurogenesis	8	260	0.00061	ENSP00000232424,ENSP00000233638,ENSP00000295886,ENSP00000311816,ENSP00000359357,ENSP00000404100,ENSP00000405890,ENSP00000430432	GFI1,HDAC2,HES1,NKX6-1,PAX6,PBX1,REST,TLX2
GO:0034097	response to cytokine	16	1035	0.00062	ENSP00000246657,ENSP00000262238,ENSP00000265354,ENSP00000295886,ENSP00000305422,ENSP00000354487,ENSP00000360266,ENSP00000360532,ENSP00000363390,ENSP00000378040,ENSP00000384371,ENSP00000385675,ENSP00000386165,ENSP00000404100,ENSP00000427514,ENSP00000479618	BAD,BCL6,CCR7,CDC5L,CEBPA,CEBPB,CEBPD,IL6,JUN,MYC,NKX6-1,PAX6,SRF,TRIM63,YY1,ZEB1
GO:0043401	steroid hormone mediated signaling pathway	6	131	0.00066	ENSP00000231509,ENSP00000312987,ENSP00000377721,ENSP00000419692,ENSP00000420267,ENSP00000447173	HNF4A,NR2F2,NR3C1,NR6A1,RXRA,VDR
GO:0048863	stem cell differentiation	6	131	0.00066	ENSP00000232424,ENSP00000265354,ENSP00000304169,ENSP00000311816,ENSP00000328928,ENSP00000377747	ENSG00000173575,HES1,HOXB4,PITX2,REST,SRF
GO:0061029	eyelid development in camera-type eye	3	13	0.00066	ENSP00000265354,ENSP00000360266,ENSP00000430432	HDAC2,JUN,SRF
GO:0002244	hematopoietic progenitor cell differentiation	5	80	0.00068	ENSP00000244745,ENSP00000265354,ENSP00000311816,ENSP00000328928,ENSP00000377747	ENSG00000173575,HOXB4,REST,SOX4,SRF
GO:0071383	cellular response to steroid hormone stimulus	7	197	0.00074	ENSP00000231509,ENSP00000311816,ENSP00000312987,ENSP00000377721,ENSP00000419692,ENSP00000420267,ENSP00000447173	HNF4A,NR2F2,NR3C1,NR6A1,REST,RXRA,VDR
GO:0021984	adenohypophysis development	3	14	0.00078	ENSP00000232424,ENSP00000304169,ENSP00000342931	HES1,PITX2,POU1F1
GO:0035886	vascular smooth muscle cell differentiation	3	14	0.00078	ENSP00000232424,ENSP00000265354,ENSP00000304169	HES1,PITX2,SRF
GO:0007276	gamete generation	12	632	0.00086	ENSP00000262238,ENSP00000283921,ENSP00000316842,ENSP00000323880,ENSP00000338157,ENSP00000350844,ENSP00000371711,ENSP00000378040,ENSP00000379368,ENSP00000384371,ENSP00000419457,ENSP00000420267	BAD,BCL6,DMRT1,FOXJ1,HOXA10,NOBOX,NR6A1,PAX5,SIX5,YY1,ZBTB16,ZNF35
GO:0001709	cell fate determination	4	43	0.00088	ENSP00000232424,ENSP00000239461,ENSP00000259915,ENSP00000404100	HES1,PAX6,POU5F1,PRRX1
GO:0060412	ventricular septum morphogenesis	4	43	0.00088	ENSP00000232424,ENSP00000244745,ENSP00000304169,ENSP00000338272	HES1,HEY1,PITX2,SOX4
GO:0048705	skeletal system morphogenesis	7	204	0.00089	ENSP00000222726,ENSP00000231656,ENSP00000239461,ENSP00000249501,ENSP00000328928,ENSP00000350844,ENSP00000354487	CDX1,HOXA5,HOXB4,HOXD10,PAX5,PRRX1,ZEB1
GO:0045665	negative regulation of neuron differentiation	7	205	0.00091	ENSP00000232424,ENSP00000233638,ENSP00000311816,ENSP00000359357,ENSP00000404100,ENSP00000405890,ENSP00000430432	GFI1,HDAC2,HES1,PAX6,PBX1,REST,TLX2
GO:1903037	regulation of leukocyte cell-cell adhesion	8	278	0.00091	ENSP00000232424,ENSP00000246657,ENSP00000305422,ENSP00000323880,ENSP00000338157,ENSP00000378040,ENSP00000384371,ENSP00000385675	BAD,BCL6,CCR7,CEBPB,FOXJ1,HES1,IL6,ZBTB16
GO:0001658	branching involved in ureteric bud morphogenesis	4	45	0.001	ENSP00000263334,ENSP00000405890,ENSP00000479618,ENSP00000481581	FOXD1,MYC,PAX8,PBX1
GO:0002791	regulation of peptide secretion	10	452	0.001	ENSP00000244745,ENSP00000246657,ENSP00000262305,ENSP00000263334,ENSP00000295886,ENSP00000311816,ENSP00000312987,ENSP00000378040,ENSP00000385675,ENSP00000484803	BAD,CCR7,FOXP1,HNF4A,IL6,NKX6-1,PAX8,RAB11FIP3,REST,SOX4
GO:0002070	epithelial cell maturation	3	16	0.0011	ENSP00000222726,ENSP00000290295,ENSP00000295886	HOXA5,HOXB13,NKX6-1
GO:0048469	cell maturation	6	146	0.0011	ENSP00000222726,ENSP00000232424,ENSP00000290295,ENSP00000295886,ENSP00000427514,ENSP00000431603	CEBPA,HES1,HOXA5,HOXB13,NKX6-1,POU2F2
GO:0001568	blood vessel development	10	464	0.0012	ENSP00000232424,ENSP00000239461,ENSP00000244745,ENSP00000265354,ENSP00000290295,ENSP00000304169,ENSP00000338272,ENSP00000360266,ENSP00000377721,ENSP00000404100	HES1,HEY1,HOXB13,JUN,NR2F2,PAX6,PITX2,PRRX1,SOX4,SRF
GO:0042472	inner ear morphogenesis	5	92	0.0012	ENSP00000239461,ENSP00000263334,ENSP00000304286,ENSP00000354487,ENSP00000362296	FOXI1,PAX8,POU3F4,PRRX1,ZEB1
GO:0043923	positive regulation by host of viral transcription	3	17	0.0012	ENSP00000263253,ENSP00000329357,ENSP00000360266	EP300,JUN,SP1
GO:0045638	negative regulation of myeloid cell differentiation	5	93	0.0012	ENSP00000222726,ENSP00000338157,ENSP00000343619,ENSP00000346886,ENSP00000479618	GABPA,HOXA5,HOXA9,MYC,ZBTB16
GO:0022612	gland morphogenesis	5	94	0.0013	ENSP00000290295,ENSP00000305422,ENSP00000344285,ENSP00000404100,ENSP00000447173	BSX,CEBPB,HOXB13,PAX6,VDR
GO:0048514	blood vessel morphogenesis	9	381	0.0014	ENSP00000232424,ENSP00000239461,ENSP00000244745,ENSP00000265354,ENSP00000290295,ENSP00000304169,ENSP00000338272,ENSP00000360266,ENSP00000377721	HES1,HEY1,HOXB13,JUN,NR2F2,PITX2,PRRX1,SOX4,SRF
GO:0008283	cell population proliferation	12	676	0.0015	ENSP00000244745,ENSP00000295886,ENSP00000304169,ENSP00000305422,ENSP00000328928,ENSP00000329170,ENSP00000344782,ENSP00000354487,ENSP00000371711,ENSP00000378040,ENSP00000419692,ENSP00000420267	BAD,CEBPB,DMRT1,GFI1B,HOXB4,NKX6-1,NR6A1,PITX2,POU3F2,RXRA,SOX4,ZEB1
GO:0042981	regulation of apoptotic process	19	1501	0.0015	ENSP00000222726,ENSP00000244745,ENSP00000246657,ENSP00000263334,ENSP00000305422,ENSP00000311816,ENSP00000338157,ENSP00000339906,ENSP00000344352,ENSP00000360266,ENSP00000360811,ENSP00000362296,ENSP00000378040,ENSP00000384371,ENSP00000385675,ENSP00000430432,ENSP00000447173,ENSP00000479618,ENSP00000484803	ATF3,BAD,BCL6,CCR7,CEBPB,FOXP1,HDAC2,HOXA5,IL6,JUN,LHX3,MYC,PAX4,PAX8,POU3F4,REST,SOX4,VDR,ZBTB16
GO:0043433	negative regulation of DNA-binding transcription factor activity	6	157	0.0015	ENSP00000284000,ENSP00000323880,ENSP00000343535,ENSP00000359357,ENSP00000405890,ENSP00000430432	CEBPG,FOXJ1,GFI1,HDAC2,PBX1,USP7
GO:0045321	leukocyte activation	14	894	0.0015	ENSP00000244745,ENSP00000246657,ENSP00000257555,ENSP00000262965,ENSP00000263253,ENSP00000265354,ENSP00000284000,ENSP00000305422,ENSP00000342931,ENSP00000360266,ENSP00000384371,ENSP00000385675,ENSP00000431603,ENSP00000484803	BCL6,CCR7,CEBPB,CEBPG,EP300,FOXP1,HNF1A,IL6,JUN,POU1F1,POU2F2,SOX4,SRF,TCF3
GO:0045655	regulation of monocyte differentiation	3	19	0.0016	ENSP00000360266,ENSP00000479618,ENSP00000484803	FOXP1,JUN,MYC
GO:0055012	ventricular cardiac muscle cell differentiation	3	19	0.0016	ENSP00000304169,ENSP00000346389,ENSP00000419692	MEF2A,PITX2,RXRA
GO:0001775	cell activation	15	1024	0.0017	ENSP00000244745,ENSP00000246657,ENSP00000257555,ENSP00000262965,ENSP00000263253,ENSP00000265354,ENSP00000284000,ENSP00000305422,ENSP00000342931,ENSP00000343619,ENSP00000360266,ENSP00000384371,ENSP00000385675,ENSP00000431603,ENSP00000484803	BCL6,CCR7,CEBPB,CEBPG,EP300,FOXP1,HNF1A,HOXA9,IL6,JUN,POU1F1,POU2F2,SOX4,SRF,TCF3
GO:0021543	pallium development	6	163	0.0018	ENSP00000265354,ENSP00000329170,ENSP00000350844,ENSP00000378040,ENSP00000383909,ENSP00000404100	BAD,DMRTA2,PAX5,PAX6,POU3F2,SRF
GO:0061515	myeloid cell development	4	54	0.0018	ENSP00000263253,ENSP00000265354,ENSP00000384371,ENSP00000484803	BCL6,EP300,FOXP1,SRF
GO:0003007	heart morphogenesis	7	235	0.0019	ENSP00000232424,ENSP00000244745,ENSP00000265354,ENSP00000304169,ENSP00000338272,ENSP00000360266,ENSP00000419692	HES1,HEY1,JUN,PITX2,RXRA,SOX4,SRF
GO:0016477	cell migration	13	812	0.002	ENSP00000222726,ENSP00000232424,ENSP00000246657,ENSP00000265354,ENSP00000295886,ENSP00000304169,ENSP00000309439,ENSP00000323880,ENSP00000329170,ENSP00000371711,ENSP00000377721,ENSP00000385675,ENSP00000404100	CCR7,DMRT1,FOXJ1,HES1,HOXA5,HOXB9,IL6,NKX6-1,NR2F2,PAX6,PITX2,POU3F2,SRF
GO:0021537	telencephalon development	7	237	0.002	ENSP00000232424,ENSP00000265354,ENSP00000329170,ENSP00000350844,ENSP00000378040,ENSP00000383909,ENSP00000404100	BAD,DMRTA2,HES1,PAX5,PAX6,POU3F2,SRF
GO:0050896	response to stimulus	57	7824	0.002	ENSP00000221996,ENSP00000231509,ENSP00000232424,ENSP00000244745,ENSP00000246657,ENSP00000259915,ENSP00000262238,ENSP00000263253,ENSP00000263334,ENSP00000265354,ENSP00000284000,ENSP00000290295,ENSP00000293805,ENSP00000295886,ENSP00000297338,ENSP00000304169,ENSP00000305422,ENSP00000309439,ENSP00000311816,ENSP00000312987,ENSP00000323880,ENSP00000329170,ENSP00000329357,ENSP00000338272,ENSP00000339906…	ATF3,BAD,BCL6,BCL6B,CCR7,CDC5L,CEBPA,CEBPB,CEBPD,CEBPG,CRX,DMRT1,ENSG00000173575,EP300,FOXD1,FOXJ1,FOXP1,GABPA,GFI1,HDAC2,HES1,HEY1,HNF4A,HOXB13,HOXB9,IL6,JUN,LHX3,MEF2A,MYC,NKX6-1,NR2F2,NR3C1,NR6A1,PAX4,PAX5,PAX6,PAX8,PBX1,PITX2,POU2F2,POU3F2,POU5F1,RAD21,REST,RREB1,RXRA,SOX4,SP1,SRF,TCF12,TRIM63,USP7,VDR,YY1,ZEB1,ZNF35
GO:0060348	bone development	6	166	0.002	ENSP00000231656,ENSP00000263253,ENSP00000265354,ENSP00000304169,ENSP00000328928,ENSP00000484803	CDX1,EP300,FOXP1,HOXB4,PITX2,SRF
GO:0001101	response to acid chemical	8	323	0.0022	ENSP00000246657,ENSP00000262238,ENSP00000305422,ENSP00000354487,ENSP00000378040,ENSP00000379368,ENSP00000419692,ENSP00000430432	BAD,CCR7,CEBPB,HDAC2,RXRA,YY1,ZEB1,ZNF35
GO:0021912	regulation of transcription from RNA polymerase II promoter involved in spinal cord motor neuron fate specification	2	3	0.0022	ENSP00000295886,ENSP00000404100	NKX6-1,PAX6
GO:0043065	positive regulation of apoptotic process	11	604	0.0022	ENSP00000222726,ENSP00000244745,ENSP00000311816,ENSP00000338157,ENSP00000344352,ENSP00000360266,ENSP00000378040,ENSP00000384371,ENSP00000385675,ENSP00000447173,ENSP00000479618	ATF3,BAD,BCL6,HOXA5,IL6,JUN,MYC,REST,SOX4,VDR,ZBTB16
GO:0098751	bone cell development	3	22	0.0022	ENSP00000263253,ENSP00000265354,ENSP00000484803	EP300,FOXP1,SRF
GO:2000078	positive regulation of type B pancreatic cell development	2	3	0.0022	ENSP00000295886,ENSP00000378040	BAD,NKX6-1
GO:0021987	cerebral cortex development	5	109	0.0023	ENSP00000329170,ENSP00000350844,ENSP00000378040,ENSP00000383909,ENSP00000404100	BAD,DMRTA2,PAX5,PAX6,POU3F2
GO:0030522	intracellular receptor signaling pathway	6	173	0.0024	ENSP00000231509,ENSP00000312987,ENSP00000377721,ENSP00000419692,ENSP00000420267,ENSP00000447173	HNF4A,NR2F2,NR3C1,NR6A1,RXRA,VDR
GO:0030878	thyroid gland development	3	23	0.0025	ENSP00000222726,ENSP00000263334,ENSP00000265354	HOXA5,PAX8,SRF
GO:0048511	rhythmic process	7	250	0.0026	ENSP00000221996,ENSP00000263253,ENSP00000266304,ENSP00000329357,ENSP00000339906,ENSP00000360266,ENSP00000430432	CRX,EP300,HDAC2,JUN,PAX4,SP1,TEF
GO:0050708	regulation of protein secretion	9	422	0.0026	ENSP00000244745,ENSP00000246657,ENSP00000262305,ENSP00000295886,ENSP00000311816,ENSP00000312987,ENSP00000378040,ENSP00000385675,ENSP00000484803	BAD,CCR7,FOXP1,HNF4A,IL6,NKX6-1,RAB11FIP3,REST,SOX4
GO:0051091	positive regulation of DNA-binding transcription factor activity	7	250	0.0026	ENSP00000242462,ENSP00000262965,ENSP00000263253,ENSP00000265354,ENSP00000284000,ENSP00000295886,ENSP00000385675	CEBPG,EP300,IL6,NEUROG3,NKX6-1,SRF,TCF3
GO:0060548	negative regulation of cell death	14	953	0.0026	ENSP00000244745,ENSP00000246657,ENSP00000263334,ENSP00000305422,ENSP00000339906,ENSP00000360266,ENSP00000360811,ENSP00000362296,ENSP00000378040,ENSP00000384371,ENSP00000385675,ENSP00000430432,ENSP00000479618,ENSP00000484803	BAD,BCL6,CCR7,CEBPB,FOXP1,HDAC2,IL6,JUN,LHX3,MYC,PAX4,PAX8,POU3F4,SOX4
GO:0002683	negative regulation of immune system process	9	425	0.0027	ENSP00000222726,ENSP00000232424,ENSP00000305422,ENSP00000323880,ENSP00000338157,ENSP00000343619,ENSP00000346886,ENSP00000384371,ENSP00000479618	BCL6,CEBPB,FOXJ1,GABPA,HES1,HOXA5,HOXA9,MYC,ZBTB16
GO:0002064	epithelial cell development	6	179	0.0028	ENSP00000222726,ENSP00000290295,ENSP00000295886,ENSP00000323880,ENSP00000371711,ENSP00000404100	DMRT1,FOXJ1,HOXA5,HOXB13,NKX6-1,PAX6
GO:0045666	positive regulation of neuron differentiation	8	337	0.0028	ENSP00000221996,ENSP00000242462,ENSP00000262965,ENSP00000265354,ENSP00000295886,ENSP00000354487,ENSP00000384371,ENSP00000388940	BCL6,CRX,NEUROG3,NKX6-1,SRF,TCF12,TCF3,ZEB1
GO:0003171	atrioventricular valve development	3	25	0.003	ENSP00000244745,ENSP00000304169,ENSP00000338272	HEY1,PITX2,SOX4
GO:0009786	regulation of asymmetric cell division	2	4	0.003	ENSP00000259915,ENSP00000404100	PAX6,POU5F1
GO:0021913	regulation of transcription from RNA polymerase II promoter involved in ventral spinal cord interneuron specification	2	4	0.003	ENSP00000295886,ENSP00000404100	NKX6-1,PAX6
GO:0035910	ascending aorta morphogenesis	2	4	0.003	ENSP00000232424,ENSP00000244745	HES1,SOX4
GO:0046885	regulation of hormone biosynthetic process	3	25	0.003	ENSP00000311816,ENSP00000359357,ENSP00000447173	GFI1,REST,VDR
GO:0001764	neuron migration	5	118	0.0031	ENSP00000265354,ENSP00000295886,ENSP00000304169,ENSP00000377721,ENSP00000404100	NKX6-1,NR2F2,PAX6,PITX2,SRF
GO:0050864	regulation of B cell activation	5	118	0.0031	ENSP00000262965,ENSP00000323880,ENSP00000378040,ENSP00000384371,ENSP00000385675	BAD,BCL6,FOXJ1,IL6,TCF3
GO:0051128	regulation of cellular component organization	24	2306	0.0031	ENSP00000233638,ENSP00000239461,ENSP00000242462,ENSP00000246657,ENSP00000257555,ENSP00000259915,ENSP00000263253,ENSP00000265354,ENSP00000295886,ENSP00000297338,ENSP00000312987,ENSP00000326933,ENSP00000329170,ENSP00000343535,ENSP00000350844,ENSP00000359357,ENSP00000360266,ENSP00000369270,ENSP00000371711,ENSP00000378040,ENSP00000384371,ENSP00000427514,ENSP00000430432,ENSP00000479618	BAD,BCL6,CCR7,CEBPA,DMRT1,EP300,GFI1,HDAC2,HNF1A,HNF4A,JUN,MYC,NEUROG3,NKX6-1,PAX5,POU3F2,POU5F1,PRRX1,RAD21,RREB1,SERTAD2,SRF,TLX2,USP7
GO:0051251	positive regulation of lymphocyte activation	7	260	0.0031	ENSP00000232424,ENSP00000246657,ENSP00000262965,ENSP00000338157,ENSP00000378040,ENSP00000384371,ENSP00000385675	BAD,BCL6,CCR7,HES1,IL6,TCF3,ZBTB16
GO:0046883	regulation of hormone secretion	7	261	0.0032	ENSP00000244745,ENSP00000262305,ENSP00000263334,ENSP00000295886,ENSP00000311816,ENSP00000312987,ENSP00000378040	BAD,HNF4A,NKX6-1,PAX8,RAB11FIP3,REST,SOX4
GO:0045598	regulation of fat cell differentiation	5	120	0.0033	ENSP00000232424,ENSP00000305422,ENSP00000338157,ENSP00000385675,ENSP00000427514	CEBPA,CEBPB,HES1,IL6,ZBTB16
GO:0043618	regulation of transcription from RNA polymerase II promoter in response to stress	4	67	0.0035	ENSP00000263253,ENSP00000305422,ENSP00000344352,ENSP00000360266	ATF3,CEBPB,EP300,JUN
GO:0001889	liver development	5	123	0.0036	ENSP00000232424,ENSP00000284000,ENSP00000305422,ENSP00000360266,ENSP00000427514	CEBPA,CEBPB,CEBPG,HES1,JUN
GO:0030879	mammary gland development	5	123	0.0036	ENSP00000222726,ENSP00000305422,ENSP00000309439,ENSP00000344285,ENSP00000447173	BSX,CEBPB,HOXA5,HOXB9,VDR
GO:0043069	negative regulation of programmed cell death	13	873	0.0036	ENSP00000246657,ENSP00000263334,ENSP00000305422,ENSP00000339906,ENSP00000360266,ENSP00000360811,ENSP00000362296,ENSP00000378040,ENSP00000384371,ENSP00000385675,ENSP00000430432,ENSP00000479618,ENSP00000484803	BAD,BCL6,CCR7,CEBPB,FOXP1,HDAC2,IL6,JUN,LHX3,MYC,PAX4,PAX8,POU3F4
GO:0051098	regulation of binding	8	356	0.0038	ENSP00000232424,ENSP00000263253,ENSP00000265990,ENSP00000284000,ENSP00000304169,ENSP00000338272,ENSP00000360266,ENSP00000430432	BTAF1,CEBPG,EP300,HDAC2,HES1,HEY1,JUN,PITX2
GO:0003338	metanephros morphogenesis	3	28	0.0039	ENSP00000232424,ENSP00000263334,ENSP00000323880	FOXJ1,HES1,PAX8
GO:0050870	positive regulation of T cell activation	6	193	0.0039	ENSP00000232424,ENSP00000246657,ENSP00000338157,ENSP00000378040,ENSP00000384371,ENSP00000385675	BAD,BCL6,CCR7,HES1,IL6,ZBTB16
GO:0061448	connective tissue development	6	194	0.0039	ENSP00000222726,ENSP00000239461,ENSP00000265354,ENSP00000338157,ENSP00000354487,ENSP00000481581	FOXD1,HOXA5,PRRX1,SRF,ZBTB16,ZEB1
GO:0021523	somatic motor neuron differentiation	2	5	0.004	ENSP00000360811,ENSP00000404100	LHX3,PAX6
GO:0060126	somatotropin secreting cell differentiation	2	5	0.004	ENSP00000304169,ENSP00000342931	PITX2,POU1F1
GO:0072049	comma-shaped body morphogenesis	2	5	0.004	ENSP00000232424,ENSP00000263334	HES1,PAX8
GO:0051726	regulation of cell cycle	15	1129	0.0041	ENSP00000232424,ENSP00000244745,ENSP00000262305,ENSP00000262965,ENSP00000263253,ENSP00000297338,ENSP00000360266,ENSP00000360532,ENSP00000371711,ENSP00000377721,ENSP00000378040,ENSP00000384371,ENSP00000405890,ENSP00000427514,ENSP00000479618	BAD,BCL6,CDC5L,CEBPA,DMRT1,EP300,HES1,JUN,MYC,NR2F2,PBX1,RAB11FIP3,RAD21,SOX4,TCF3
GO:0045580	regulation of T cell differentiation	5	130	0.0045	ENSP00000323880,ENSP00000338157,ENSP00000354487,ENSP00000378040,ENSP00000384371	BAD,BCL6,FOXJ1,ZBTB16,ZEB1
GO:0030217	T cell differentiation	5	131	0.0046	ENSP00000244745,ENSP00000246657,ENSP00000265354,ENSP00000385675,ENSP00000484803	CCR7,FOXP1,IL6,SOX4,SRF
GO:0040011	locomotion	15	1144	0.0046	ENSP00000222726,ENSP00000232424,ENSP00000246657,ENSP00000265354,ENSP00000295886,ENSP00000304169,ENSP00000309439,ENSP00000323880,ENSP00000329170,ENSP00000360811,ENSP00000371711,ENSP00000377721,ENSP00000385675,ENSP00000404100,ENSP00000481581	CCR7,DMRT1,FOXD1,FOXJ1,HES1,HOXA5,HOXB9,IL6,LHX3,NKX6-1,NR2F2,PAX6,PITX2,POU3F2,SRF
GO:0001893	maternal placenta development	3	31	0.0049	ENSP00000377721,ENSP00000419692,ENSP00000447173	NR2F2,RXRA,VDR
GO:0009749	response to glucose	5	133	0.0049	ENSP00000244745,ENSP00000265354,ENSP00000295886,ENSP00000312987,ENSP00000378040	BAD,HNF4A,NKX6-1,SOX4,SRF
GO:0009954	proximal/distal pattern formation	3	31	0.0049	ENSP00000249501,ENSP00000283921,ENSP00000405890	HOXA10,HOXD10,PBX1
GO:0060674	placenta blood vessel development	3	31	0.0049	ENSP00000232424,ENSP00000338272,ENSP00000377721	HES1,HEY1,NR2F2
GO:0090276	regulation of peptide hormone secretion	6	204	0.0049	ENSP00000244745,ENSP00000263334,ENSP00000295886,ENSP00000311816,ENSP00000312987,ENSP00000378040	BAD,HNF4A,NKX6-1,PAX8,REST,SOX4
GO:0050670	regulation of lymphocyte proliferation	6	205	0.005	ENSP00000232424,ENSP00000262965,ENSP00000305422,ENSP00000323880,ENSP00000384371,ENSP00000385675	BCL6,CEBPB,FOXJ1,HES1,IL6,TCF3
GO:0061309	cardiac neural crest cell development involved in outflow tract morphogenesis	2	6	0.0051	ENSP00000232424,ENSP00000304169	HES1,PITX2
GO:2000027	regulation of animal organ morphogenesis	6	207	0.0051	ENSP00000232424,ENSP00000259915,ENSP00000263334,ENSP00000419692,ENSP00000447173,ENSP00000479618	HES1,MYC,PAX8,POU5F1,RXRA,VDR
GO:0072210	metanephric nephron development	3	32	0.0052	ENSP00000232424,ENSP00000263334,ENSP00000481581	FOXD1,HES1,PAX8
GO:0007623	circadian rhythm	5	137	0.0054	ENSP00000221996,ENSP00000263253,ENSP00000339906,ENSP00000360266,ENSP00000430432	CRX,EP300,HDAC2,JUN,PAX4
GO:0051384	response to glucocorticoid	5	138	0.0055	ENSP00000231509,ENSP00000311816,ENSP00000363390,ENSP00000378040,ENSP00000385675	BAD,IL6,NR3C1,REST,TRIM63
GO:0055007	cardiac muscle cell differentiation	4	79	0.0058	ENSP00000265354,ENSP00000304169,ENSP00000346389,ENSP00000419692	MEF2A,PITX2,RXRA,SRF
GO:0048661	positive regulation of smooth muscle cell proliferation	4	80	0.006	ENSP00000162391,ENSP00000360266,ENSP00000385675,ENSP00000484803	FOXJ2,FOXP1,IL6,JUN
GO:0050871	positive regulation of B cell activation	4	80	0.006	ENSP00000262965,ENSP00000378040,ENSP00000384371,ENSP00000385675	BAD,BCL6,IL6,TCF3
GO:0032496	response to lipopolysaccharide	7	298	0.0061	ENSP00000246657,ENSP00000305422,ENSP00000359357,ENSP00000360266,ENSP00000385675,ENSP00000430432,ENSP00000484803	CCR7,CEBPB,FOXP1,GFI1,HDAC2,IL6,JUN
GO:0002069	columnar/cuboidal epithelial cell maturation	2	7	0.0062	ENSP00000222726,ENSP00000295886	HOXA5,NKX6-1
GO:0010742	macrophage derived foam cell differentiation	2	7	0.0062	ENSP00000263253,ENSP00000356591	EP300,SOAT1
GO:0021796	cerebral cortex regionalization	2	7	0.0062	ENSP00000383909,ENSP00000404100	DMRTA2,PAX6
GO:0060558	regulation of calcidiol 1-monooxygenase activity	2	7	0.0062	ENSP00000359357,ENSP00000447173	GFI1,VDR
GO:0072050	S-shaped body morphogenesis	2	7	0.0062	ENSP00000232424,ENSP00000263334	HES1,PAX8
GO:1902893	regulation of pri-miRNA transcription by RNA polymerase II	3	35	0.0063	ENSP00000262238,ENSP00000265354,ENSP00000360266	JUN,SRF,YY1
GO:0001656	metanephros development	4	83	0.0066	ENSP00000232424,ENSP00000263334,ENSP00000323880,ENSP00000481581	FOXD1,FOXJ1,HES1,PAX8
GO:0045778	positive regulation of ossification	4	83	0.0066	ENSP00000305422,ENSP00000338157,ENSP00000385675,ENSP00000427514	CEBPA,CEBPB,IL6,ZBTB16
GO:0110110	positive regulation of animal organ morphogenesis	4	83	0.0066	ENSP00000259915,ENSP00000263334,ENSP00000447173,ENSP00000479618	MYC,PAX8,POU5F1,VDR
GO:0120035	regulation of plasma membrane bounded cell projection organization	10	600	0.0066	ENSP00000233638,ENSP00000239461,ENSP00000242462,ENSP00000246657,ENSP00000265354,ENSP00000295886,ENSP00000329170,ENSP00000359357,ENSP00000369270,ENSP00000430432	CCR7,GFI1,HDAC2,NEUROG3,NKX6-1,POU3F2,PRRX1,RREB1,SRF,TLX2
GO:0010464	regulation of mesenchymal cell proliferation	3	36	0.0068	ENSP00000239461,ENSP00000354487,ENSP00000479618	MYC,PRRX1,ZEB1
GO:0031076	embryonic camera-type eye development	3	36	0.0068	ENSP00000304169,ENSP00000354487,ENSP00000404100	PAX6,PITX2,ZEB1
GO:0035137	hindlimb morphogenesis	3	36	0.0068	ENSP00000249501,ENSP00000304169,ENSP00000338157	HOXD10,PITX2,ZBTB16
GO:0050810	regulation of steroid biosynthetic process	4	84	0.0068	ENSP00000311816,ENSP00000329357,ENSP00000359357,ENSP00000447173	GFI1,REST,SP1,VDR
GO:0051216	cartilage development	5	147	0.0068	ENSP00000222726,ENSP00000239461,ENSP00000265354,ENSP00000338157,ENSP00000354487	HOXA5,PRRX1,SRF,ZBTB16,ZEB1
GO:1901532	regulation of hematopoietic progenitor cell differentiation	3	36	0.0068	ENSP00000232424,ENSP00000262965,ENSP00000388940	HES1,TCF12,TCF3
GO:0071345	cellular response to cytokine stimulus	13	953	0.0069	ENSP00000246657,ENSP00000262238,ENSP00000295886,ENSP00000305422,ENSP00000354487,ENSP00000360532,ENSP00000378040,ENSP00000384371,ENSP00000385675,ENSP00000386165,ENSP00000404100,ENSP00000427514,ENSP00000479618	BAD,BCL6,CCR7,CDC5L,CEBPA,CEBPB,CEBPD,IL6,MYC,NKX6-1,PAX6,YY1,ZEB1
GO:0035690	cellular response to drug	7	310	0.0071	ENSP00000231509,ENSP00000311816,ENSP00000346886,ENSP00000378040,ENSP00000385675,ENSP00000430432,ENSP00000479618	BAD,GABPA,HDAC2,IL6,MYC,NR3C1,REST
GO:0035710	CD4-positive, alpha-beta T cell activation	3	37	0.0071	ENSP00000305422,ENSP00000385675,ENSP00000484803	CEBPB,FOXP1,IL6
GO:0045058	T cell selection	3	37	0.0071	ENSP00000246657,ENSP00000265354,ENSP00000385675	CCR7,IL6,SRF
GO:0045687	positive regulation of glial cell differentiation	3	37	0.0071	ENSP00000232424,ENSP00000295886,ENSP00000430432	HDAC2,HES1,NKX6-1
GO:0042110	T cell activation	6	225	0.0072	ENSP00000244745,ENSP00000246657,ENSP00000265354,ENSP00000305422,ENSP00000385675,ENSP00000484803	CCR7,CEBPB,FOXP1,IL6,SOX4,SRF
GO:0035912	dorsal aorta morphogenesis	2	8	0.0073	ENSP00000265354,ENSP00000338272	HEY1,SRF
GO:0044342	type B pancreatic cell proliferation	2	8	0.0073	ENSP00000295886,ENSP00000378040	BAD,NKX6-1
GO:0045602	negative regulation of endothelial cell differentiation	2	8	0.0073	ENSP00000162391,ENSP00000354487	FOXJ2,ZEB1
GO:0060534	trachea cartilage development	2	8	0.0073	ENSP00000222726,ENSP00000265354	HOXA5,SRF
GO:0072282	metanephric nephron tubule morphogenesis	2	8	0.0073	ENSP00000232424,ENSP00000263334	HES1,PAX8
GO:0001817	regulation of cytokine production	10	615	0.0074	ENSP00000246657,ENSP00000262238,ENSP00000263253,ENSP00000284000,ENSP00000305422,ENSP00000323880,ENSP00000384371,ENSP00000385675,ENSP00000430432,ENSP00000484803	BCL6,CCR7,CEBPB,CEBPG,EP300,FOXJ1,FOXP1,HDAC2,IL6,YY1
GO:0033044	regulation of chromosome organization	7	313	0.0074	ENSP00000259915,ENSP00000297338,ENSP00000343535,ENSP00000350844,ENSP00000359357,ENSP00000384371,ENSP00000479618	BCL6,GFI1,MYC,PAX5,POU5F1,RAD21,USP7
GO:0002790	peptide secretion	5	153	0.0078	ENSP00000246657,ENSP00000257555,ENSP00000385675,ENSP00000431603,ENSP00000484803	CCR7,FOXP1,HNF1A,IL6,POU2F2
GO:0042692	muscle cell differentiation	6	230	0.0078	ENSP00000232424,ENSP00000265354,ENSP00000304169,ENSP00000338272,ENSP00000346389,ENSP00000419692	HES1,HEY1,MEF2A,PITX2,RXRA,SRF
GO:0009798	axis specification	4	89	0.0079	ENSP00000231656,ENSP00000265354,ENSP00000304169,ENSP00000404100	CDX1,PAX6,PITX2,SRF
GO:0010001	glial cell differentiation	5	154	0.0079	ENSP00000232424,ENSP00000244745,ENSP00000295886,ENSP00000329170,ENSP00000404100	HES1,NKX6-1,PAX6,POU3F2,SOX4
GO:0030857	negative regulation of epithelial cell differentiation	3	39	0.0079	ENSP00000162391,ENSP00000232424,ENSP00000354487	FOXJ2,HES1,ZEB1
GO:0030155	regulation of cell adhesion	10	623	0.008	ENSP00000232424,ENSP00000246657,ENSP00000265354,ENSP00000305422,ENSP00000323880,ENSP00000338157,ENSP00000369270,ENSP00000378040,ENSP00000384371,ENSP00000385675	BAD,BCL6,CCR7,CEBPB,FOXJ1,HES1,IL6,RREB1,SRF,ZBTB16
GO:0045786	negative regulation of cell cycle	9	517	0.0082	ENSP00000244745,ENSP00000263253,ENSP00000297338,ENSP00000360532,ENSP00000371711,ENSP00000377721,ENSP00000384371,ENSP00000427514,ENSP00000479618	BCL6,CDC5L,CEBPA,DMRT1,EP300,MYC,NR2F2,RAD21,SOX4
GO:0000902	cell morphogenesis	10	626	0.0083	ENSP00000232424,ENSP00000263253,ENSP00000265354,ENSP00000346389,ENSP00000360811,ENSP00000371711,ENSP00000384371,ENSP00000404100,ENSP00000447173,ENSP00000481581	BCL6,DMRT1,EP300,FOXD1,HES1,LHX3,MEF2A,PAX6,SRF,VDR
GO:0090184	positive regulation of kidney development	3	40	0.0083	ENSP00000263334,ENSP00000479618,ENSP00000481581	FOXD1,MYC,PAX8
GO:0008593	regulation of Notch signaling pathway	4	91	0.0084	ENSP00000232424,ENSP00000263253,ENSP00000338272,ENSP00000384371	BCL6,EP300,HES1,HEY1
GO:0043066	negative regulation of apoptotic process	12	859	0.0084	ENSP00000246657,ENSP00000263334,ENSP00000305422,ENSP00000339906,ENSP00000360266,ENSP00000360811,ENSP00000362296,ENSP00000384371,ENSP00000385675,ENSP00000430432,ENSP00000479618,ENSP00000484803	BCL6,CCR7,CEBPB,FOXP1,HDAC2,IL6,JUN,LHX3,MYC,PAX4,PAX8,POU3F4
GO:0002634	regulation of germinal center formation	2	9	0.0085	ENSP00000323880,ENSP00000384371	BCL6,FOXJ1
GO:0048664	neuron fate determination	2	9	0.0085	ENSP00000232424,ENSP00000239461	HES1,PRRX1
GO:0061004	pattern specification involved in kidney development	2	9	0.0085	ENSP00000263334,ENSP00000481581	FOXD1,PAX8
GO:0061072	iris morphogenesis	2	9	0.0085	ENSP00000304169,ENSP00000404100	PAX6,PITX2
GO:0070933	histone H4 deacetylation	2	9	0.0085	ENSP00000311816,ENSP00000430432	HDAC2,REST
GO:0030334	regulation of cell migration	11	753	0.0093	ENSP00000246657,ENSP00000265354,ENSP00000295886,ENSP00000304169,ENSP00000329357,ENSP00000360266,ENSP00000369270,ENSP00000377721,ENSP00000385675,ENSP00000404100,ENSP00000484803	CCR7,FOXP1,IL6,JUN,NKX6-1,NR2F2,PAX6,PITX2,RREB1,SP1,SRF
GO:0006367	transcription initiation from RNA polymerase II promoter	5	162	0.0094	ENSP00000231509,ENSP00000312987,ENSP00000419692,ENSP00000420267,ENSP00000447173	HNF4A,NR3C1,NR6A1,RXRA,VDR
GO:0010646	regulation of cell communication	29	3327	0.0094	ENSP00000232424,ENSP00000239461,ENSP00000244745,ENSP00000246657,ENSP00000253968,ENSP00000259915,ENSP00000262305,ENSP00000263253,ENSP00000263334,ENSP00000265354,ENSP00000295886,ENSP00000311816,ENSP00000312987,ENSP00000326272,ENSP00000338272,ENSP00000342931,ENSP00000344352,ENSP00000350844,ENSP00000354487,ENSP00000359357,ENSP00000360266,ENSP00000371711,ENSP00000378040,ENSP00000384371,ENSP00000385675…	ATF3,BAD,BARX1,BCL6,CCR7,DMRT1,EP300,FOXD1,FOXL1,FOXP1,GFI1,HDAC2,HES1,HEY1,HNF4A,IL6,JUN,MYC,NKX6-1,PAX5,PAX8,POU1F1,POU5F1,PRRX1,RAB11FIP3,REST,SOX4,SRF,ZEB1
GO:0048666	neuron development	11	758	0.0097	ENSP00000232424,ENSP00000249501,ENSP00000265354,ENSP00000329170,ENSP00000346389,ENSP00000360266,ENSP00000360811,ENSP00000385675,ENSP00000404100,ENSP00000430432,ENSP00000481581	FOXD1,HDAC2,HES1,HOXD10,IL6,JUN,LHX3,MEF2A,PAX6,POU3F2,SRF
GO:0014807	regulation of somitogenesis	2	10	0.0098	ENSP00000231656,ENSP00000371686	CDX1,DMRT2
GO:0032353	negative regulation of hormone biosynthetic process	2	10	0.0098	ENSP00000311816,ENSP00000359357	GFI1,REST
GO:0042035	regulation of cytokine biosynthetic process	4	96	0.0098	ENSP00000284000,ENSP00000305422,ENSP00000323880,ENSP00000385675	CEBPB,CEBPG,FOXJ1,IL6
GO:0042118	endothelial cell activation	2	10	0.0098	ENSP00000343619,ENSP00000484803	FOXP1,HOXA9
GO:0048483	autonomic nervous system development	3	43	0.0098	ENSP00000232424,ENSP00000233638,ENSP00000244745	HES1,SOX4,TLX2
GO:0060379	cardiac muscle cell myoblast differentiation	2	10	0.0098	ENSP00000265354,ENSP00000311816	REST,SRF
GO:0060433	bronchus development	2	10	0.0098	ENSP00000222726,ENSP00000265354	HOXA5,SRF
GO:0061005	cell differentiation involved in kidney development	3	43	0.0098	ENSP00000232424,ENSP00000263334,ENSP00000323880	FOXJ1,HES1,PAX8
GO:2001054	negative regulation of mesenchymal cell apoptotic process	2	10	0.0098	ENSP00000263334,ENSP00000362296	PAX8,POU3F4
GO:0048538	thymus development	3	44	0.0102	ENSP00000232424,ENSP00000265354,ENSP00000405890	HES1,PBX1,SRF
GO:0060425	lung morphogenesis	3	44	0.0102	ENSP00000222726,ENSP00000265354,ENSP00000304169	HOXA5,PITX2,SRF
GO:0051270	regulation of cellular component movement	12	886	0.0103	ENSP00000246657,ENSP00000265354,ENSP00000295886,ENSP00000304169,ENSP00000329357,ENSP00000360266,ENSP00000369270,ENSP00000377721,ENSP00000384371,ENSP00000385675,ENSP00000404100,ENSP00000484803	BCL6,CCR7,FOXP1,IL6,JUN,NKX6-1,NR2F2,PAX6,PITX2,RREB1,SP1,SRF
GO:0023051	regulation of signaling	29	3360	0.0106	ENSP00000232424,ENSP00000239461,ENSP00000244745,ENSP00000246657,ENSP00000253968,ENSP00000259915,ENSP00000262305,ENSP00000263253,ENSP00000263334,ENSP00000265354,ENSP00000295886,ENSP00000311816,ENSP00000312987,ENSP00000326272,ENSP00000338272,ENSP00000342931,ENSP00000344352,ENSP00000350844,ENSP00000354487,ENSP00000359357,ENSP00000360266,ENSP00000371711,ENSP00000378040,ENSP00000384371,ENSP00000385675…	ATF3,BAD,BARX1,BCL6,CCR7,DMRT1,EP300,FOXD1,FOXL1,FOXP1,GFI1,HDAC2,HES1,HEY1,HNF4A,IL6,JUN,MYC,NKX6-1,PAX5,PAX8,POU1F1,POU5F1,PRRX1,RAB11FIP3,REST,SOX4,SRF,ZEB1
GO:0090102	cochlea development	3	45	0.0107	ENSP00000232424,ENSP00000354487,ENSP00000362296	HES1,POU3F4,ZEB1
GO:0002890	negative regulation of immunoglobulin mediated immune response	2	11	0.0112	ENSP00000323880,ENSP00000384371	BCL6,FOXJ1
GO:0007548	sex differentiation	6	252	0.0112	ENSP00000283921,ENSP00000304169,ENSP00000305422,ENSP00000312987,ENSP00000371711,ENSP00000405890	CEBPB,DMRT1,HNF4A,HOXA10,PBX1,PITX2
GO:0010870	positive regulation of receptor biosynthetic process	2	11	0.0112	ENSP00000222726,ENSP00000430432	HDAC2,HOXA5
GO:0010975	regulation of neuron projection development	8	443	0.0112	ENSP00000233638,ENSP00000239461,ENSP00000242462,ENSP00000265354,ENSP00000295886,ENSP00000329170,ENSP00000359357,ENSP00000430432	GFI1,HDAC2,NEUROG3,NKX6-1,POU3F2,PRRX1,SRF,TLX2
GO:0042092	type 2 immune response	2	11	0.0112	ENSP00000293805,ENSP00000384371	BCL6,BCL6B
GO:0060525	prostate glandular acinus development	2	11	0.0112	ENSP00000290295,ENSP00000419692	HOXB13,RXRA
GO:0050796	regulation of insulin secretion	5	172	0.0115	ENSP00000244745,ENSP00000295886,ENSP00000311816,ENSP00000312987,ENSP00000378040	BAD,HNF4A,NKX6-1,REST,SOX4
GO:0002262	myeloid cell homeostasis	4	102	0.0116	ENSP00000265354,ENSP00000284000,ENSP00000384371,ENSP00000385675	BCL6,CEBPG,IL6,SRF
GO:0002573	myeloid leukocyte differentiation	4	102	0.0116	ENSP00000246657,ENSP00000360266,ENSP00000427514,ENSP00000484803	CCR7,CEBPA,FOXP1,JUN
GO:0030010	establishment of cell polarity	4	102	0.0116	ENSP00000232424,ENSP00000246657,ENSP00000323880,ENSP00000404100	CCR7,FOXJ1,HES1,PAX6
GO:0002066	columnar/cuboidal epithelial cell development	3	47	0.0117	ENSP00000222726,ENSP00000295886,ENSP00000404100	HOXA5,NKX6-1,PAX6
GO:2000107	negative regulation of leukocyte apoptotic process	3	48	0.0124	ENSP00000246657,ENSP00000384371,ENSP00000484803	BCL6,CCR7,FOXP1
GO:1903530	regulation of secretion by cell	10	672	0.0125	ENSP00000244745,ENSP00000246657,ENSP00000262305,ENSP00000263334,ENSP00000295886,ENSP00000311816,ENSP00000312987,ENSP00000378040,ENSP00000385675,ENSP00000484803	BAD,CCR7,FOXP1,HNF4A,IL6,NKX6-1,PAX8,RAB11FIP3,REST,SOX4
GO:0002903	negative regulation of B cell apoptotic process	2	12	0.0127	ENSP00000384371,ENSP00000484803	BCL6,FOXP1
GO:0021903	rostrocaudal neural tube patterning	2	12	0.0127	ENSP00000232424,ENSP00000404100	HES1,PAX6
GO:0043922	negative regulation by host of viral transcription	2	12	0.0127	ENSP00000311816,ENSP00000360266	JUN,REST
GO:0048505	regulation of timing of cell differentiation	2	12	0.0127	ENSP00000232424,ENSP00000404100	HES1,PAX6
GO:0060742	epithelial cell differentiation involved in prostate gland development	2	12	0.0127	ENSP00000290295,ENSP00000419692	HOXB13,RXRA
GO:1903708	positive regulation of hemopoiesis	5	177	0.0127	ENSP00000222726,ENSP00000338157,ENSP00000360266,ENSP00000378040,ENSP00000384371	BAD,BCL6,HOXA5,JUN,ZBTB16
GO:1990440	positive regulation of transcription from RNA polymerase II promoter in response to endoplasmic reticulum stress	2	12	0.0127	ENSP00000305422,ENSP00000344352	ATF3,CEBPB
GO:0035094	response to nicotine	3	49	0.0128	ENSP00000295886,ENSP00000378040,ENSP00000430432	BAD,HDAC2,NKX6-1
GO:0050679	positive regulation of epithelial cell proliferation	5	178	0.0128	ENSP00000329357,ENSP00000360266,ENSP00000369270,ENSP00000378040,ENSP00000479618	BAD,JUN,MYC,RREB1,SP1
GO:0055013	cardiac muscle cell development	3	49	0.0128	ENSP00000265354,ENSP00000304169,ENSP00000346389	MEF2A,PITX2,SRF
GO:0010769	regulation of cell morphogenesis involved in differentiation	6	263	0.0131	ENSP00000233638,ENSP00000242462,ENSP00000265354,ENSP00000295886,ENSP00000329170,ENSP00000369270	NEUROG3,NKX6-1,POU3F2,RREB1,SRF,TLX2
GO:0051302	regulation of cell division	5	179	0.0131	ENSP00000259915,ENSP00000262305,ENSP00000371711,ENSP00000404100,ENSP00000479618	DMRT1,MYC,PAX6,POU5F1,RAB11FIP3
GO:0051716	cellular response to stimulus	45	6212	0.0136	ENSP00000231509,ENSP00000232424,ENSP00000244745,ENSP00000246657,ENSP00000259915,ENSP00000262238,ENSP00000263253,ENSP00000263334,ENSP00000265354,ENSP00000295886,ENSP00000297338,ENSP00000304169,ENSP00000305422,ENSP00000309439,ENSP00000311816,ENSP00000312987,ENSP00000329170,ENSP00000329357,ENSP00000338272,ENSP00000343535,ENSP00000344352,ENSP00000346389,ENSP00000346886,ENSP00000354487,ENSP00000359357…	ATF3,BAD,BCL6,CCR7,CDC5L,CEBPA,CEBPB,CEBPD,DMRT1,ENSG00000173575,EP300,GABPA,GFI1,HDAC2,HES1,HEY1,HNF4A,HOXB9,IL6,JUN,MEF2A,MYC,NKX6-1,NR2F2,NR3C1,NR6A1,PAX6,PAX8,PBX1,PITX2,POU3F2,POU5F1,RAD21,REST,RREB1,RXRA,SOX4,SP1,SRF,TRIM63,USP7,VDR,YY1,ZEB1,ZNF35
GO:0030278	regulation of ossification	5	181	0.0137	ENSP00000305422,ENSP00000338157,ENSP00000385675,ENSP00000405890,ENSP00000427514	CEBPA,CEBPB,IL6,PBX1,ZBTB16
GO:0048593	camera-type eye morphogenesis	4	109	0.014	ENSP00000262238,ENSP00000304169,ENSP00000354487,ENSP00000404100	PAX6,PITX2,YY1,ZEB1
GO:0055015	ventricular cardiac muscle cell development	2	13	0.0141	ENSP00000304169,ENSP00000346389	MEF2A,PITX2
GO:1901654	response to ketone	5	183	0.0141	ENSP00000231509,ENSP00000246657,ENSP00000290295,ENSP00000360532,ENSP00000378040	BAD,CCR7,CDC5L,HOXB13,NR3C1
GO:1902894	negative regulation of pri-miRNA transcription by RNA polymerase II	2	13	0.0141	ENSP00000262238,ENSP00000265354	SRF,YY1
GO:1902931	negative regulation of alcohol biosynthetic process	2	13	0.0141	ENSP00000311816,ENSP00000359357	GFI1,REST
GO:0035914	skeletal muscle cell differentiation	3	52	0.0146	ENSP00000344352,ENSP00000350844,ENSP00000383909	ATF3,DMRTA2,PAX5
GO:0043392	negative regulation of DNA binding	3	52	0.0146	ENSP00000338272,ENSP00000360266,ENSP00000430432	HDAC2,HEY1,JUN
GO:0042542	response to hydrogen peroxide	4	112	0.0152	ENSP00000360266,ENSP00000378040,ENSP00000385675,ENSP00000430432	BAD,HDAC2,IL6,JUN
GO:0043388	positive regulation of DNA binding	3	53	0.0153	ENSP00000232424,ENSP00000284000,ENSP00000304169	CEBPG,HES1,PITX2
GO:0060485	mesenchyme development	5	187	0.0153	ENSP00000222726,ENSP00000232424,ENSP00000304169,ENSP00000338272,ENSP00000481581	FOXD1,HES1,HEY1,HOXA5,PITX2
GO:0072216	positive regulation of metanephros development	2	14	0.0156	ENSP00000263334,ENSP00000479618	MYC,PAX8
GO:1902337	regulation of apoptotic process involved in morphogenesis	2	14	0.0156	ENSP00000263334,ENSP00000447173	PAX8,VDR
GO:1903351	cellular response to dopamine	2	14	0.0156	ENSP00000346886,ENSP00000430432	GABPA,HDAC2
GO:0000302	response to reactive oxygen species	5	189	0.0158	ENSP00000246657,ENSP00000360266,ENSP00000378040,ENSP00000385675,ENSP00000430432	BAD,CCR7,HDAC2,IL6,JUN
GO:0019216	regulation of lipid metabolic process	7	373	0.016	ENSP00000246657,ENSP00000311816,ENSP00000312987,ENSP00000329357,ENSP00000359357,ENSP00000419692,ENSP00000447173	CCR7,GFI1,HNF4A,REST,RXRA,SP1,VDR
GO:0045785	positive regulation of cell adhesion	7	375	0.0164	ENSP00000232424,ENSP00000246657,ENSP00000338157,ENSP00000369270,ENSP00000378040,ENSP00000384371,ENSP00000385675	BAD,BCL6,CCR7,HES1,IL6,RREB1,ZBTB16
GO:0061180	mammary gland epithelium development	3	55	0.0165	ENSP00000222726,ENSP00000305422,ENSP00000447173	CEBPB,HOXA5,VDR
GO:0002761	regulation of myeloid leukocyte differentiation	4	116	0.0166	ENSP00000305422,ENSP00000360266,ENSP00000479618,ENSP00000484803	CEBPB,FOXP1,JUN,MYC
GO:0045787	positive regulation of cell cycle	7	376	0.0166	ENSP00000232424,ENSP00000244745,ENSP00000262965,ENSP00000263253,ENSP00000297338,ENSP00000371711,ENSP00000405890	DMRT1,EP300,HES1,PBX1,RAD21,SOX4,TCF3
GO:0031400	negative regulation of protein modification process	9	592	0.0167	ENSP00000244745,ENSP00000344352,ENSP00000350844,ENSP00000360266,ENSP00000377721,ENSP00000404100,ENSP00000427514,ENSP00000430432,ENSP00000479618	ATF3,CEBPA,HDAC2,JUN,MYC,NR2F2,PAX5,PAX6,SOX4
GO:0006928	movement of cell or subcellular component	15	1355	0.0169	ENSP00000222726,ENSP00000232424,ENSP00000246657,ENSP00000265354,ENSP00000295886,ENSP00000304169,ENSP00000309439,ENSP00000323880,ENSP00000329170,ENSP00000360811,ENSP00000371711,ENSP00000377721,ENSP00000385675,ENSP00000404100,ENSP00000481581	CCR7,DMRT1,FOXD1,FOXJ1,HES1,HOXA5,HOXB9,IL6,LHX3,NKX6-1,NR2F2,PAX6,PITX2,POU3F2,SRF
GO:0048872	homeostasis of number of cells	5	193	0.0169	ENSP00000246657,ENSP00000265354,ENSP00000284000,ENSP00000384371,ENSP00000385675	BCL6,CCR7,CEBPG,IL6,SRF
GO:0035855	megakaryocyte development	2	15	0.0171	ENSP00000263253,ENSP00000265354	EP300,SRF
GO:0045408	regulation of interleukin-6 biosynthetic process	2	15	0.0171	ENSP00000305422,ENSP00000323880	CEBPB,FOXJ1
GO:0060347	heart trabecula formation	2	15	0.0171	ENSP00000265354,ENSP00000338272	HEY1,SRF
GO:0007154	cell communication	39	5219	0.0175	ENSP00000222726,ENSP00000231509,ENSP00000232424,ENSP00000244745,ENSP00000246657,ENSP00000253968,ENSP00000257555,ENSP00000259915,ENSP00000263253,ENSP00000263334,ENSP00000265354,ENSP00000295886,ENSP00000304169,ENSP00000305422,ENSP00000309439,ENSP00000312987,ENSP00000326272,ENSP00000338272,ENSP00000344352,ENSP00000346389,ENSP00000354487,ENSP00000360266,ENSP00000360532,ENSP00000363390,ENSP00000369270…	ATF3,BAD,BARX1,BCL6,CCR7,CDC5L,CEBPA,CEBPB,CEBPD,DMRT1,EP300,FOXD1,FOXL1,HES1,HEY1,HNF1A,HNF4A,HOXA5,HOXB9,IL6,JUN,MEF2A,MYC,NKX6-1,NR2F2,NR3C1,NR6A1,PAX6,PAX8,PBX1,PITX2,POU5F1,RREB1,RXRA,SOX4,SRF,TRIM63,VDR,ZEB1
GO:0045669	positive regulation of osteoblast differentiation	3	58	0.0186	ENSP00000305422,ENSP00000385675,ENSP00000427514	CEBPA,CEBPB,IL6
GO:0033599	regulation of mammary gland epithelial cell proliferation	2	16	0.0189	ENSP00000222726,ENSP00000369270	HOXA5,RREB1
GO:0055003	cardiac myofibril assembly	2	16	0.0189	ENSP00000265354,ENSP00000346389	MEF2A,SRF
GO:0072148	epithelial cell fate commitment	2	16	0.0189	ENSP00000232424,ENSP00000377721	HES1,NR2F2
GO:0045600	positive regulation of fat cell differentiation	3	59	0.0193	ENSP00000305422,ENSP00000338157,ENSP00000427514	CEBPA,CEBPB,ZBTB16
GO:0042531	positive regulation of tyrosine phosphorylation of STAT protein	3	60	0.0202	ENSP00000232424,ENSP00000385675,ENSP00000430432	HDAC2,HES1,IL6
GO:0043903	regulation of symbiosis, encompassing mutualism through parasitism	5	203	0.0202	ENSP00000263253,ENSP00000311816,ENSP00000329357,ENSP00000360266,ENSP00000378040	BAD,EP300,JUN,REST,SP1
GO:0031175	neuron projection development	9	616	0.0207	ENSP00000232424,ENSP00000265354,ENSP00000346389,ENSP00000360266,ENSP00000360811,ENSP00000385675,ENSP00000404100,ENSP00000430432,ENSP00000481581	FOXD1,HDAC2,HES1,IL6,JUN,LHX3,MEF2A,PAX6,SRF
GO:0045061	thymic T cell selection	2	17	0.0207	ENSP00000246657,ENSP00000265354	CCR7,SRF
GO:0045995	regulation of embryonic development	4	125	0.0207	ENSP00000231656,ENSP00000232424,ENSP00000312987,ENSP00000371686	CDX1,DMRT2,HES1,HNF4A
GO:0060644	mammary gland epithelial cell differentiation	2	17	0.0207	ENSP00000222726,ENSP00000305422	CEBPB,HOXA5
GO:1901698	response to nitrogen compound	12	988	0.0209	ENSP00000246657,ENSP00000295886,ENSP00000305422,ENSP00000329357,ENSP00000339906,ENSP00000346886,ENSP00000354487,ENSP00000360266,ENSP00000360532,ENSP00000378040,ENSP00000385675,ENSP00000430432	BAD,CCR7,CDC5L,CEBPB,GABPA,HDAC2,IL6,JUN,NKX6-1,PAX4,SP1,ZEB1
GO:0023052	signaling	38	5108	0.0214	ENSP00000222726,ENSP00000231509,ENSP00000232424,ENSP00000244745,ENSP00000246657,ENSP00000253968,ENSP00000257555,ENSP00000259915,ENSP00000263253,ENSP00000263334,ENSP00000295886,ENSP00000304169,ENSP00000305422,ENSP00000309439,ENSP00000312987,ENSP00000326272,ENSP00000338272,ENSP00000344352,ENSP00000346389,ENSP00000354487,ENSP00000360266,ENSP00000360532,ENSP00000363390,ENSP00000369270,ENSP00000371711…	ATF3,BAD,BARX1,BCL6,CCR7,CDC5L,CEBPA,CEBPB,CEBPD,DMRT1,EP300,FOXD1,FOXL1,HES1,HEY1,HNF1A,HNF4A,HOXA5,HOXB9,IL6,JUN,MEF2A,MYC,NKX6-1,NR2F2,NR3C1,NR6A1,PAX6,PAX8,PBX1,PITX2,POU5F1,RREB1,RXRA,SOX4,TRIM63,VDR,ZEB1
GO:0010632	regulation of epithelial cell migration	5	209	0.0224	ENSP00000329357,ENSP00000360266,ENSP00000369270,ENSP00000377721,ENSP00000484803	FOXP1,JUN,NR2F2,RREB1,SP1
GO:0021872	forebrain generation of neurons	3	63	0.0224	ENSP00000232424,ENSP00000362296,ENSP00000404100	HES1,PAX6,POU3F4
GO:0002068	glandular epithelial cell development	2	18	0.0225	ENSP00000295886,ENSP00000404100	NKX6-1,PAX6
GO:0003309	type B pancreatic cell differentiation	2	18	0.0225	ENSP00000295886,ENSP00000404100	NKX6-1,PAX6
GO:0007221	positive regulation of transcription of Notch receptor target	2	18	0.0225	ENSP00000263253,ENSP00000405890	EP300,PBX1
GO:0006974	cellular response to DNA damage stimulus	10	749	0.023	ENSP00000244745,ENSP00000262238,ENSP00000263253,ENSP00000297338,ENSP00000343535,ENSP00000360532,ENSP00000377747,ENSP00000378040,ENSP00000384371,ENSP00000479618	BAD,BCL6,CDC5L,ENSG00000173575,EP300,MYC,RAD21,SOX4,USP7,YY1
GO:0050671	positive regulation of lymphocyte proliferation	4	130	0.023	ENSP00000232424,ENSP00000262965,ENSP00000384371,ENSP00000385675	BCL6,HES1,IL6,TCF3
GO:1905330	regulation of morphogenesis of an epithelium	4	130	0.023	ENSP00000263334,ENSP00000369270,ENSP00000419692,ENSP00000484803	FOXP1,PAX8,RREB1,RXRA
GO:0033554	cellular response to stress	16	1553	0.0231	ENSP00000244745,ENSP00000262238,ENSP00000263253,ENSP00000265354,ENSP00000297338,ENSP00000305422,ENSP00000343535,ENSP00000344352,ENSP00000360266,ENSP00000360532,ENSP00000377747,ENSP00000378040,ENSP00000384371,ENSP00000385675,ENSP00000430432,ENSP00000479618	ATF3,BAD,BCL6,CDC5L,CEBPB,ENSG00000173575,EP300,HDAC2,IL6,JUN,MYC,RAD21,SOX4,SRF,USP7,YY1
GO:0010243	response to organonitrogen compound	11	876	0.0233	ENSP00000295886,ENSP00000305422,ENSP00000329357,ENSP00000339906,ENSP00000346886,ENSP00000354487,ENSP00000360266,ENSP00000360532,ENSP00000378040,ENSP00000385675,ENSP00000430432	BAD,CDC5L,CEBPB,GABPA,HDAC2,IL6,JUN,NKX6-1,PAX4,SP1,ZEB1
GO:0002684	positive regulation of immune system process	11	882	0.0243	ENSP00000222726,ENSP00000232424,ENSP00000246657,ENSP00000262965,ENSP00000263253,ENSP00000323880,ENSP00000338157,ENSP00000360266,ENSP00000378040,ENSP00000384371,ENSP00000385675	BAD,BCL6,CCR7,EP300,FOXJ1,HES1,HOXA5,IL6,JUN,TCF3,ZBTB16
GO:0010560	positive regulation of glycoprotein biosynthetic process	2	19	0.0243	ENSP00000246657,ENSP00000356591	CCR7,SOAT1
GO:0030220	platelet formation	2	19	0.0243	ENSP00000263253,ENSP00000265354	EP300,SRF
GO:0009306	protein secretion	4	134	0.025	ENSP00000246657,ENSP00000257555,ENSP00000431603,ENSP00000484803	CCR7,FOXP1,HNF1A,POU2F2
GO:0002088	lens development in camera-type eye	3	68	0.0262	ENSP00000316842,ENSP00000327048,ENSP00000404100	MAF,PAX6,SIX5
GO:0007422	peripheral nervous system development	3	68	0.0262	ENSP00000242462,ENSP00000249501,ENSP00000329170	HOXD10,NEUROG3,POU3F2
GO:0010634	positive regulation of epithelial cell migration	4	136	0.0262	ENSP00000329357,ENSP00000360266,ENSP00000369270,ENSP00000484803	FOXP1,JUN,RREB1,SP1
GO:0023019	signal transduction involved in regulation of gene expression	2	20	0.0262	ENSP00000312987,ENSP00000404100	HNF4A,PAX6
GO:0042789	mRNA transcription by RNA polymerase II	2	20	0.0262	ENSP00000259915,ENSP00000265354	POU5F1,SRF
GO:0060716	labyrinthine layer blood vessel development	2	20	0.0262	ENSP00000232424,ENSP00000338272	HES1,HEY1
GO:0090092	regulation of transmembrane receptor protein serine/threonine kinase signaling pathway	5	220	0.0262	ENSP00000232424,ENSP00000259915,ENSP00000354487,ENSP00000371711,ENSP00000481581	DMRT1,FOXD1,HES1,POU5F1,ZEB1
GO:2000737	negative regulation of stem cell differentiation	2	20	0.0262	ENSP00000232424,ENSP00000311816	HES1,REST
GO:0055001	muscle cell development	4	137	0.0264	ENSP00000232424,ENSP00000265354,ENSP00000304169,ENSP00000346389	HES1,MEF2A,PITX2,SRF
GO:0044403	symbiont process	9	650	0.0272	ENSP00000263253,ENSP00000311816,ENSP00000329357,ENSP00000343535,ENSP00000359357,ENSP00000360266,ENSP00000378040,ENSP00000419692,ENSP00000427514	BAD,CEBPA,EP300,GFI1,JUN,REST,RXRA,SP1,USP7
GO:0042493	response to drug	11	900	0.0273	ENSP00000231509,ENSP00000246657,ENSP00000295886,ENSP00000311816,ENSP00000339906,ENSP00000346886,ENSP00000360266,ENSP00000378040,ENSP00000385675,ENSP00000430432,ENSP00000479618	BAD,CCR7,GABPA,HDAC2,IL6,JUN,MYC,NKX6-1,NR3C1,PAX4,REST
GO:0055123	digestive system development	4	139	0.0276	ENSP00000222726,ENSP00000253968,ENSP00000304169,ENSP00000326272	BARX1,FOXL1,HOXA5,PITX2
GO:1902107	positive regulation of leukocyte differentiation	4	139	0.0276	ENSP00000338157,ENSP00000360266,ENSP00000378040,ENSP00000384371	BAD,BCL6,JUN,ZBTB16
GO:0002052	positive regulation of neuroblast proliferation	2	21	0.028	ENSP00000383909,ENSP00000404100	DMRTA2,PAX6
GO:0021854	hypothalamus development	2	21	0.028	ENSP00000304169,ENSP00000329170	PITX2,POU3F2
GO:0032024	positive regulation of insulin secretion	3	70	0.028	ENSP00000244745,ENSP00000295886,ENSP00000378040	BAD,NKX6-1,SOX4
GO:0032652	regulation of interleukin-1 production	3	70	0.028	ENSP00000246657,ENSP00000430432,ENSP00000484803	CCR7,FOXP1,HDAC2
GO:0060261	positive regulation of transcription initiation from RNA polymerase II promoter	2	21	0.028	ENSP00000257555,ENSP00000265354	HNF1A,SRF
GO:0060972	left/right pattern formation	2	21	0.028	ENSP00000304169,ENSP00000323880	FOXJ1,PITX2
GO:1903020	positive regulation of glycoprotein metabolic process	2	21	0.028	ENSP00000246657,ENSP00000356591	CCR7,SOAT1
GO:0003151	outflow tract morphogenesis	3	71	0.0285	ENSP00000232424,ENSP00000304169,ENSP00000360266	HES1,JUN,PITX2
GO:0007166	cell surface receptor signaling pathway	20	2198	0.0285	ENSP00000232424,ENSP00000244745,ENSP00000246657,ENSP00000259915,ENSP00000263253,ENSP00000295886,ENSP00000304169,ENSP00000309439,ENSP00000312987,ENSP00000338272,ENSP00000354487,ENSP00000360266,ENSP00000378040,ENSP00000384371,ENSP00000385675,ENSP00000386165,ENSP00000404100,ENSP00000405890,ENSP00000427514,ENSP00000479618	BAD,BCL6,CCR7,CEBPA,CEBPD,EP300,HES1,HEY1,HNF4A,HOXB9,IL6,JUN,MYC,NKX6-1,PAX6,PBX1,PITX2,POU5F1,SOX4,ZEB1
GO:0051246	regulation of protein metabolic process	23	2668	0.0285	ENSP00000232424,ENSP00000244745,ENSP00000246657,ENSP00000263253,ENSP00000284000,ENSP00000305422,ENSP00000311816,ENSP00000323880,ENSP00000343535,ENSP00000344352,ENSP00000350844,ENSP00000356591,ENSP00000359357,ENSP00000360266,ENSP00000377721,ENSP00000378040,ENSP00000384371,ENSP00000385675,ENSP00000404100,ENSP00000419692,ENSP00000427514,ENSP00000430432,ENSP00000479618	ATF3,BAD,BCL6,CCR7,CEBPA,CEBPB,CEBPG,EP300,FOXJ1,GFI1,HDAC2,HES1,IL6,JUN,MYC,NR2F2,PAX5,PAX6,REST,RXRA,SOAT1,SOX4,USP7
GO:0003208	cardiac ventricle morphogenesis	3	72	0.0296	ENSP00000244745,ENSP00000338272,ENSP00000419692	HEY1,RXRA,SOX4
GO:0007224	smoothened signaling pathway	3	72	0.0296	ENSP00000232424,ENSP00000295886,ENSP00000404100	HES1,NKX6-1,PAX6
GO:0001836	release of cytochrome c from mitochondria	2	22	0.0297	ENSP00000360266,ENSP00000378040	BAD,JUN
GO:0003181	atrioventricular valve morphogenesis	2	22	0.0297	ENSP00000244745,ENSP00000338272	HEY1,SOX4
GO:0097150	neuronal stem cell population maintenance	2	22	0.0297	ENSP00000232424,ENSP00000239461	HES1,PRRX1
GO:0072422	signal transduction involved in DNA damage checkpoint	3	73	0.0304	ENSP00000244745,ENSP00000263253,ENSP00000360532	CDC5L,EP300,SOX4
GO:0009611	response to wounding	8	547	0.0305	ENSP00000259915,ENSP00000265354,ENSP00000290295,ENSP00000312987,ENSP00000360266,ENSP00000385675,ENSP00000404100,ENSP00000430432	HDAC2,HNF4A,HOXB13,IL6,JUN,PAX6,POU5F1,SRF
GO:0010894	negative regulation of steroid biosynthetic process	2	23	0.0318	ENSP00000311816,ENSP00000359357	GFI1,REST
GO:0043368	positive T cell selection	2	23	0.0318	ENSP00000265354,ENSP00000385675	IL6,SRF
GO:0045686	negative regulation of glial cell differentiation	2	23	0.0318	ENSP00000232424,ENSP00000295886	HES1,NKX6-1
GO:0062012	regulation of small molecule metabolic process	6	332	0.0318	ENSP00000311816,ENSP00000329357,ENSP00000342931,ENSP00000359357,ENSP00000378040,ENSP00000447173	BAD,GFI1,POU1F1,REST,SP1,VDR
GO:1901522	positive regulation of transcription from RNA polymerase II promoter involved in cellular response to chemical stimulus	2	23	0.0318	ENSP00000263253,ENSP00000419692	EP300,RXRA
GO:0046879	hormone secretion	3	75	0.032	ENSP00000257555,ENSP00000385675,ENSP00000481581	FOXD1,HNF1A,IL6
GO:0051147	regulation of muscle cell differentiation	4	148	0.0324	ENSP00000262965,ENSP00000265354,ENSP00000346389,ENSP00000354487	MEF2A,SRF,TCF3,ZEB1
GO:0030218	erythrocyte differentiation	3	76	0.033	ENSP00000265354,ENSP00000284000,ENSP00000384371	BCL6,CEBPG,SRF
GO:0048596	embryonic camera-type eye morphogenesis	2	24	0.0338	ENSP00000354487,ENSP00000404100	PAX6,ZEB1
GO:0090103	cochlea morphogenesis	2	24	0.0338	ENSP00000354487,ENSP00000362296	POU3F4,ZEB1
GO:0042129	regulation of T cell proliferation	4	151	0.0344	ENSP00000232424,ENSP00000305422,ENSP00000323880,ENSP00000385675	CEBPB,FOXJ1,HES1,IL6
GO:0048583	regulation of response to stimulus	30	3882	0.0344	ENSP00000232424,ENSP00000239461,ENSP00000244745,ENSP00000246657,ENSP00000253968,ENSP00000259915,ENSP00000263253,ENSP00000284000,ENSP00000293805,ENSP00000312987,ENSP00000323880,ENSP00000326272,ENSP00000338272,ENSP00000342931,ENSP00000344352,ENSP00000346389,ENSP00000350844,ENSP00000354487,ENSP00000359357,ENSP00000360266,ENSP00000363390,ENSP00000369270,ENSP00000371711,ENSP00000378040,ENSP00000384371…	ATF3,BAD,BARX1,BCL6,BCL6B,CCR7,CEBPG,DMRT1,EP300,FOXD1,FOXJ1,FOXL1,FOXP1,GFI1,HDAC2,HES1,HEY1,HNF4A,IL6,JUN,MEF2A,MYC,PAX5,POU1F1,POU5F1,PRRX1,RREB1,SOX4,TRIM63,ZEB1
GO:0006325	chromatin organization	9	683	0.0346	ENSP00000231509,ENSP00000263253,ENSP00000307208,ENSP00000311816,ENSP00000343535,ENSP00000344782,ENSP00000377747,ENSP00000430432,ENSP00000479618	BPTF,ENSG00000173575,EP300,GFI1B,HDAC2,MYC,NR3C1,REST,USP7
GO:0007267	cell-cell signaling	12	1073	0.0346	ENSP00000222726,ENSP00000232424,ENSP00000244745,ENSP00000253968,ENSP00000257555,ENSP00000259915,ENSP00000304169,ENSP00000309439,ENSP00000326272,ENSP00000385675,ENSP00000479618,ENSP00000481581	BARX1,FOXD1,FOXL1,HES1,HNF1A,HOXA5,HOXB9,IL6,MYC,PITX2,POU5F1,SOX4
GO:0034644	cellular response to UV	3	78	0.0349	ENSP00000262238,ENSP00000263253,ENSP00000479618	EP300,MYC,YY1
GO:0045582	positive regulation of T cell differentiation	3	78	0.0349	ENSP00000338157,ENSP00000378040,ENSP00000384371	BAD,BCL6,ZBTB16
GO:0051248	negative regulation of protein metabolic process	12	1075	0.0349	ENSP00000244745,ENSP00000323880,ENSP00000343535,ENSP00000344352,ENSP00000350844,ENSP00000360266,ENSP00000377721,ENSP00000385675,ENSP00000404100,ENSP00000427514,ENSP00000430432,ENSP00000479618	ATF3,CEBPA,FOXJ1,HDAC2,IL6,JUN,MYC,NR2F2,PAX5,PAX6,SOX4,USP7
GO:0031334	positive regulation of protein complex assembly	5	241	0.035	ENSP00000246657,ENSP00000257555,ENSP00000265354,ENSP00000360266,ENSP00000427514	CCR7,CEBPA,HNF1A,JUN,SRF
GO:0033081	regulation of T cell differentiation in thymus	2	25	0.0357	ENSP00000323880,ENSP00000354487	FOXJ1,ZEB1
GO:0060765	regulation of androgen receptor signaling pathway	2	25	0.0357	ENSP00000263253,ENSP00000484803	EP300,FOXP1
GO:1902895	positive regulation of pri-miRNA transcription by RNA polymerase II	2	25	0.0357	ENSP00000265354,ENSP00000360266	JUN,SRF
GO:0032088	negative regulation of NF-kappaB transcription factor activity	3	80	0.0368	ENSP00000323880,ENSP00000343535,ENSP00000359357	FOXJ1,GFI1,USP7
GO:0002675	positive regulation of acute inflammatory response	2	26	0.038	ENSP00000246657,ENSP00000385675	CCR7,IL6
GO:0042093	T-helper cell differentiation	2	26	0.038	ENSP00000385675,ENSP00000484803	FOXP1,IL6
GO:1902036	regulation of hematopoietic stem cell differentiation	2	26	0.038	ENSP00000262965,ENSP00000388940	TCF12,TCF3
GO:0008202	steroid metabolic process	5	248	0.0385	ENSP00000356591,ENSP00000405890,ENSP00000419692,ENSP00000427514,ENSP00000447173	CEBPA,PBX1,RXRA,SOAT1,VDR
GO:0070542	response to fatty acid	3	82	0.0389	ENSP00000246657,ENSP00000262238,ENSP00000378040	BAD,CCR7,YY1
GO:0043902	positive regulation of multi-organism process	4	159	0.0396	ENSP00000263253,ENSP00000329357,ENSP00000360266,ENSP00000378040	BAD,EP300,JUN,SP1
GO:0050673	epithelial cell proliferation	3	83	0.04	ENSP00000295886,ENSP00000305422,ENSP00000378040	BAD,CEBPB,NKX6-1
GO:0051100	negative regulation of binding	4	161	0.0408	ENSP00000265990,ENSP00000338272,ENSP00000360266,ENSP00000430432	BTAF1,HDAC2,HEY1,JUN
GO:1902275	regulation of chromatin organization	4	162	0.0416	ENSP00000259915,ENSP00000350844,ENSP00000359357,ENSP00000384371	BCL6,GFI1,PAX5,POU5F1
GO:0002053	positive regulation of mesenchymal cell proliferation	2	28	0.0423	ENSP00000239461,ENSP00000479618	MYC,PRRX1
GO:0035116	embryonic hindlimb morphogenesis	2	28	0.0423	ENSP00000304169,ENSP00000338157	PITX2,ZBTB16
GO:0050873	brown fat cell differentiation	2	28	0.0423	ENSP00000305422,ENSP00000427514	CEBPA,CEBPB
GO:0042036	negative regulation of cytokine biosynthetic process	2	29	0.0447	ENSP00000323880,ENSP00000385675	FOXJ1,IL6
GO:0048821	erythrocyte development	2	29	0.0447	ENSP00000265354,ENSP00000384371	BCL6,SRF
GO:0051491	positive regulation of filopodium assembly	2	29	0.0447	ENSP00000246657,ENSP00000265354	CCR7,SRF
GO:0060428	lung epithelium development	2	29	0.0447	ENSP00000222726,ENSP00000323880	FOXJ1,HOXA5
GO:1904837	beta-catenin-TCF complex assembly	2	29	0.0447	ENSP00000263253,ENSP00000479618	EP300,MYC
GO:2000171	negative regulation of dendrite development	2	29	0.0447	ENSP00000233638,ENSP00000430432	HDAC2,TLX2
GO:0001569	branching involved in blood vessel morphogenesis	2	30	0.047	ENSP00000265354,ENSP00000304169	PITX2,SRF
GO:0002828	regulation of type 2 immune response	2	30	0.047	ENSP00000384371,ENSP00000385675	BCL6,IL6
GO:0045736	negative regulation of cyclin-dependent protein serine/threonine kinase activity	2	30	0.047	ENSP00000377721,ENSP00000427514	CEBPA,NR2F2
GO:0051272	positive regulation of cellular component movement	7	482	0.0474	ENSP00000246657,ENSP00000329357,ENSP00000360266,ENSP00000369270,ENSP00000384371,ENSP00000385675,ENSP00000484803	BCL6,CCR7,FOXP1,IL6,JUN,RREB1,SP1
GO:0044093	positive regulation of molecular function	16	1713	0.0477	ENSP00000232424,ENSP00000242462,ENSP00000246657,ENSP00000262965,ENSP00000263253,ENSP00000265354,ENSP00000284000,ENSP00000295886,ENSP00000304169,ENSP00000311816,ENSP00000323880,ENSP00000360266,ENSP00000378040,ENSP00000385675,ENSP00000447173,ENSP00000479618	BAD,CCR7,CEBPG,EP300,FOXJ1,HES1,IL6,JUN,MYC,NEUROG3,NKX6-1,PITX2,REST,SRF,TCF3,VDR
GO:0048878	chemical homeostasis	11	995	0.0483	ENSP00000244745,ENSP00000246657,ENSP00000257555,ENSP00000265354,ENSP00000312987,ENSP00000356591,ENSP00000378040,ENSP00000404100,ENSP00000427514,ENSP00000447173,ENSP00000479618	BAD,CCR7,CEBPA,HNF1A,HNF4A,MYC,PAX6,SOAT1,SOX4,SRF,VDR
GO:0071417	cellular response to organonitrogen compound	7	485	0.0486	ENSP00000295886,ENSP00000305422,ENSP00000329357,ENSP00000346886,ENSP00000354487,ENSP00000360532,ENSP00000430432	CDC5L,CEBPB,GABPA,HDAC2,NKX6-1,SP1,ZEB1
GO:0043900	regulation of multi-organism process	6	372	0.0488	ENSP00000263253,ENSP00000311816,ENSP00000329357,ENSP00000360266,ENSP00000378040,ENSP00000484803	BAD,EP300,FOXP1,JUN,REST,SP1
GO:0051099	positive regulation of binding	4	172	0.049	ENSP00000232424,ENSP00000263253,ENSP00000284000,ENSP00000304169	CEBPG,EP300,HES1,PITX2
GO:0003209	cardiac atrium morphogenesis	2	31	0.0492	ENSP00000244745,ENSP00000304169	PITX2,SOX4
GO:0006979	response to oxidative stress	6	373	0.0492	ENSP00000246657,ENSP00000329357,ENSP00000360266,ENSP00000378040,ENSP00000385675,ENSP00000430432	BAD,CCR7,HDAC2,IL6,JUN,SP1
GO:0007346	regulation of mitotic cell cycle	8	608	0.0492	ENSP00000232424,ENSP00000244745,ENSP00000262965,ENSP00000263253,ENSP00000297338,ENSP00000371711,ENSP00000384371,ENSP00000405890	BCL6,DMRT1,EP300,HES1,PBX1,RAD21,SOX4,TCF3
GO:0050869	negative regulation of B cell activation	2	31	0.0492	ENSP00000323880,ENSP00000384371	BCL6,FOXJ1
